# Supplementary material for: Diastereoselective multi-component tandem condensation: synthesis of 2-amino-4-(2-furanone)-4H-chromene-3-carbonitriles
Source: Royal Society of Chemistry journal article supplement (doi:10.1039/c9ob01345h), 2019-01-01
Supplement: c9ob01345h1.pdf [file c9ob01345h1.pdf]

## **Diastereoselective Multi-Component tandem condensation: Synthesis of 2-amino-4-(2-furanone)-4*H*-chromene-3-carbonitriles**

**Vijay Gupta,<sup>a</sup> Debashish Sahu,<sup>a</sup> Shailja Jain,<sup>b</sup> Kumar Vanka,<sup>b</sup> Ravi P. Singh<sup>\*a</sup>**

*<sup>a</sup>Department of Chemistry, Indian Institute of technology, Delhi, Hauz Khas, New Delhi-11016, India  
ravips@chemistry.iitd.ac .in*

### **Supporting Information**

#### **Content**

|                                                          |     |
|----------------------------------------------------------|-----|
| 1. General Information.....                              | S2  |
| 2. Characterizations of Products.....                    | S3  |
| 3. Single Crystal X-ray Structures.....                  | S20 |
| 4. References.....                                       | S21 |
| 5. Copies of <sup>1</sup> H and <sup>13</sup> C NMR..... | S22 |
| 6. HPLC Data                                             |     |
| 7. Computational Details.....                            | S50 |

**1. General Information:** Bruker 300 MHz or 400 MHz have been used to record  $^1\text{H}$  NMR and  $^{13}\text{C}$  NMR in deuterated solvents with residual protonated solvent signal as internal signal.  $^1\text{H}$  NMR data are reported as follows: Chemical shifts are reported in parts per million ( $\delta$ , ppm), multiplicity (s = singlet, d = doublet, t = triplet, q = quartet, m = multiplet, br = broad), integration, coupling constant ( $J$ ) in hertz (Hz).  $^{13}\text{C}$  NMR are recorded in terms of chemical shifts ( $\delta$ , ppm). Column chromatography were carried out on silica gel (100-200 mesh). Perkin Elmer FT-IR spectrometer used to record infrared spectra on KBr pellets and data are reported in terms of frequency of absorption. All solvents were dried and stored over microwave activated  $4\text{\AA}$  molecular sieves. Melting points were obtained with open capillary tubes and are uncorrected. Commercially available compounds were used without further purification.

**Materials:** Salicylaldehydes **1a-n** and **1s** were purchased from commercial source and used without further purification. Malononitrile **2** and  $\alpha$ -Angelica **3a** lactone were purchased from Sigma Aldrich and Alfa Aesar respectively and used without purification.  $\gamma$ -crotonolactone **5a** was purchased from TCI company. Salicylaldehydes **1o-r** was prepared according to the Suzuki-Miyaura coupling reaction of **1c** with corresponding aryl boronic acids.<sup>1</sup> Unsaturated  $\beta,\gamma$ -butenolides **3b-d**,<sup>2</sup> **3e**<sup>3</sup> and  $\alpha,\beta$ -butenolides **5a-b**<sup>2</sup> and **5c**<sup>4</sup> were prepared according to the known literature procedure.<sup>2</sup>

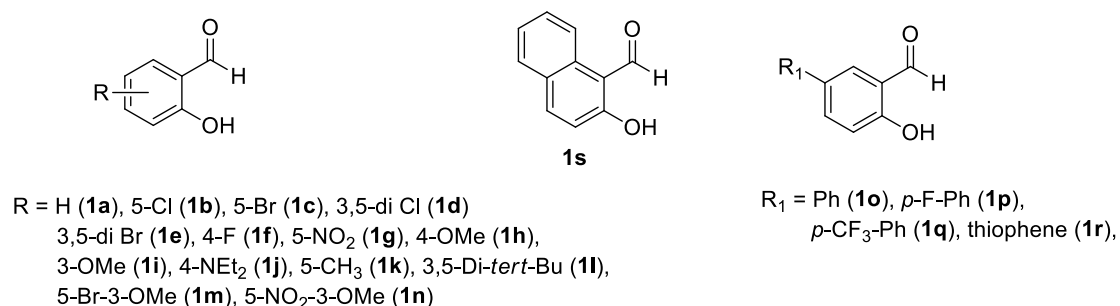

**Figure S1.** Structure of salicylaldehydes **1**

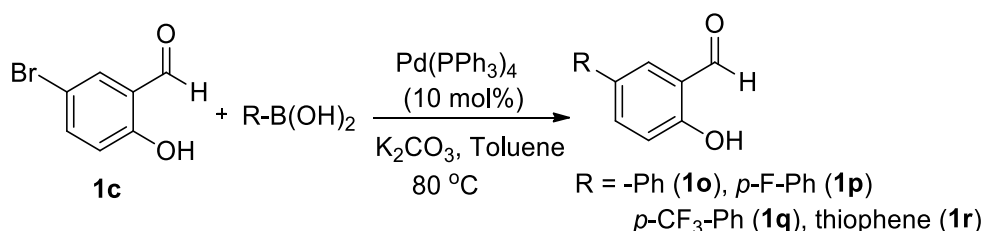

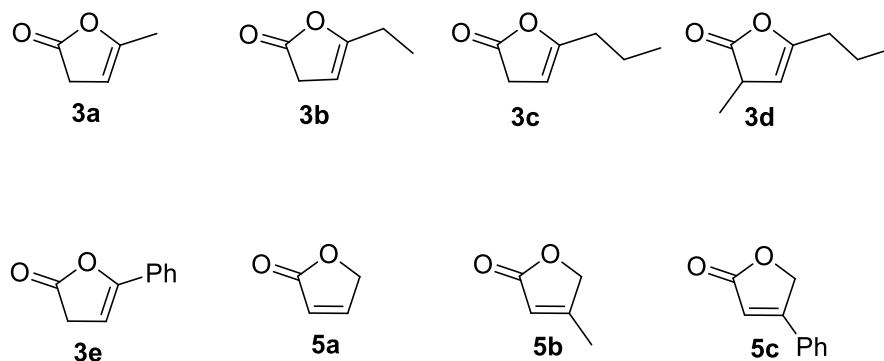

**Figure S2.** Structure of  $\gamma$ -butenolides

## 2. Characterizations of Products

### 2-amino-4-(2-methyl-5-oxo-2,5-dihydrofuran-2-yl)-4*H*-chromene-3-carbonitrile (4a).

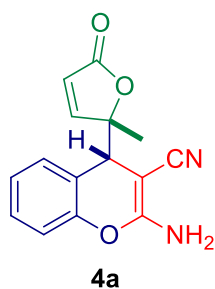

Salicylaldehyde **1a** (24.4 mg, 0.2 mmol), malononitrile (13.2 mg, 0.2 mmol) and  $\alpha$ -Angelica lactone **3a** (27  $\mu$ L, 0.3 mmol) were taken in 1 ml of dry 1,4-dioxane. To this, sodium tert-butoxide (19.2 mg, 0.2 mmol) was added under nitrogen gas atmosphere. The reaction was run for 16 h. The reaction was quenched by adding water (5 ml) and the product was extracted with ethyl acetate (10 ml x 3). The ratio of diastereomers were determined by <sup>1</sup>H NMR analysis of crude reaction mixture ( $\delta$  major: 3.68 ppm,  $\delta$  minor: 3.84 ppm) and found to be 7.33:1 (major *syn* adduct). The crude mixture was purified by column chromatography on silica gel (eluent: ethylacetate/DCM = 1/3, v/v) afforded inseparable mixture of diastereomers as white solid (43 mg, 81% yield, mp 132-134 °C). <sup>1</sup>H-NMR (300 MHz, DMSO-*d*<sub>6</sub>)  $\delta$  7.66 (d, *J* = 5.7 Hz, 1H), 7.30 (t, *J* = 8.5 Hz, 2H), 7.18 (s, 2H), 7.14 (d, *J* = 7.4 Hz, 1H), 7.02 (d, *J* = 8.0 Hz, 1H), 6.02 (d, *J* = 5.7 Hz, 1H), 3.88 (s, 1H), 1.40 (s, 3H). <sup>13</sup>C-NMR (75 MHz, CDCl<sub>3</sub>)  $\delta$  171.7, 163.1, 158.7, 150.5, 130.6, 129.4, 125.2, 121.9, 120.4, 118.9, 116.5, 92.2, 54.1, 44.9, 19.5. FTIR (KBr) cm<sup>-1</sup>: 3392, 3316, 2928, 2188, 1741, 1643, 1608, 1412, 1267, 1224, 1110, 1049, 822, 762. HRMS-ESI [M+Na]<sup>+</sup>, calcd for C<sub>15</sub>H<sub>12</sub>N<sub>2</sub>NaO<sub>3</sub> 291.0740, found 291.0740.

### 2-amino-6-chloro-4-(2-methyl-5-oxo-2,5-dihydrofuran-2-yl)-4H-chromene-3-carbonitrile (4b).

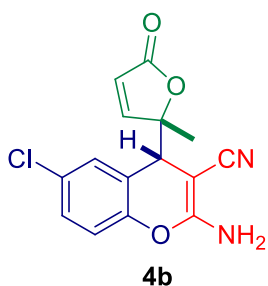

**carbonitrile (4b).** Salicylaldehyde **1b** (31.3 mg, 0.2 mmol), malononitrile (13.2 mg, 0.2 mmol) and  $\alpha$ -Angelica lactone **3a** (27  $\mu$ L, 0.3 mmol) were taken in 1ml of dry 1,4-dioxane. To this, sodium *tert*-butoxide (19.2 mg, 0.2 mmol) was added under nitrogen gas atmosphere. The reaction was run for 16 h. The reaction was quenched by adding water (5 ml) and the product was

extracted with ethyl acetate (10 ml x 3). The ratio of diastereomers were determined by  $^1\text{H}$  NMR analysis of crude reaction mixture ( $\delta$  major: 3.62 ppm,  $\delta$  minor: 3.78 ppm) and found to be 6.14:1 (major *syn* adduct). The crude mixture was purified by column chromatography on silica gel (eluent: ethylacetate/DCM = 1/3, v/v) afforded inseparable mixture of diastereomer as white solid (38 mg, 63% yield, mp 145-147  $^{\circ}\text{C}$ ).  $^1\text{H}$ -NMR (400 MHz, DMSO- $d_6$ )  $\delta$  7.72 (d,  $J$  = 5.2 Hz, 1H), 7.34 (d,  $J$  = 8.6 Hz, 1H), 7.29-7.25 (m, 3H), 7.06 (d,  $J$  = 8.6 Hz, 1H), 6.08 (d,  $J$  = 5.3 Hz, 1H), 3.92 (s, 1H), 1.41 (s, 3H).  $^{13}\text{C}$ -NMR (100 MHz, DMSO- $d_6$ )  $\delta$  171.3, 163.5, 159.7, 149.4, 129.4, 128.6, 127.4, 122.1, 121.0, 120.7, 117.8, 91.8, 49.3, 42.7, 20.5. FTIR (KBr)  $\text{cm}^{-1}$ : 3388, 3316, 3190, 2926, 2186, 1750, 1646, 1606, 1420, 1187, 1111, 824. HRMS-ESI  $[\text{M}+\text{Na}]^+$ , calcd for  $\text{C}_{15}\text{H}_{11}\text{ClN}_2\text{NaO}_3$  325.0350, found 325.0344.

### 2-amino-6-bromo-4-(2-methyl-5-oxo-2,5-dihydrofuran-2-yl)-4H-chromene-3-carbonitrile (4c).

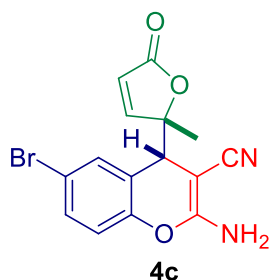

**carbonitrile (4c).** Salicylaldehyde **1c** (40 mg, 0.2 mmol), malononitrile (13.2 mg, 0.2 mmol) and  $\alpha$ -Angelica lactone **3a** (27  $\mu$ L, 0.3 mmol) were taken in 1ml of dry 1,4-dioxane. To this, sodium *tert*-butoxide (19.2 mg, 0.2 mmol) was added under nitrogen gas atmosphere. The reaction was run for 16 h. The reaction was quenched by adding water (5 ml) and the product

was extracted with ethyl acetate (10 ml x 3). The ratio of diastereomers were determined by  $^1\text{H}$  NMR analysis of crude reaction mixture ( $\delta$  major: 3.64 ppm,  $\delta$  minor: 3.78 ppm) and found to be 5.25:1 (major *syn* adduct). The crude mixture was purified by column chromatography on silica gel (eluent: ethylacetate/DCM = 1/3, v/v) afforded inseparable mixture of diastereomers as white solid (45 mg, 65% yield, mp 160-163  $^{\circ}\text{C}$ ).  $^1\text{H}$ -NMR (400 MHz, DMSO- $d_6$ )  $\delta$  7.72 (d,  $J$  = 5.7 Hz, 1H), 7.47 (dd,  $J$  = 8.7, 2.3 Hz, 1H), 7.42 (d,  $J$  = 2.2 Hz, 1H), 7.32 (s, 2H), 7.01 (d,  $J$  = 8.7 Hz, 1H), 6.08 (d,  $J$  = 5.7 Hz, 1H), 3.92 (s, 1H), 1.41 (s, 3H).  $^{13}\text{C}$ -NMR (75 MHz, DMSO- $d_6$ )  $\delta$  171.4, 163.5, 159.7, 149.9, 132.3, 131.5, 122.5, 121.0

120.7, 118.2, 115.4, 91.9, 49.3, 42.6, 20.6. FTIR (KBr)  $\text{cm}^{-1}$ : 3395, 3323, 3099, 2927, 2852, 2187, 1751, 1642, 1605, 1412, 1262, 1188, 1109, 914, 823. HRMS-ESI  $[\text{M}+\text{Na}]^+$ , calcd for  $\text{C}_{15}\text{H}_{11}\text{BrN}_2\text{NaO}_3$  368.9845, found 368.9869.

### 2-amino-6,8-dichloro-4-(2-methyl-5-oxo-2,5-dihydrofuran-2-yl)-4*H*-chromene-3-

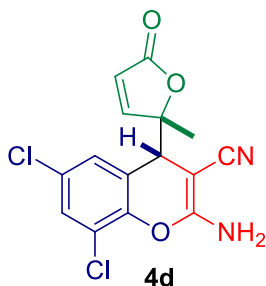

**carbonitrile (4d).** Salicylaldehyde **1d** (38 mg, 0.2 mmol), malononitrile (13.2 mg, 0.2 mmol) and  $\alpha$ -Angelica lactone **3a** (27  $\mu\text{L}$ , 0.3 mmol) were taken in 1ml of dry DCM. To this, sodium tert-butoxide (19.2 mg, 0.2 mmol) was added under nitrogen gas atmosphere. The reaction was run for 16 h. The reaction was quenched by adding water (5 ml) and the product was extracted with dichloromethane (10 ml x 3). The ratio of diastereomers were determined by  $^1\text{H}$  NMR analysis of crude reaction mixture ( $\delta$  major: 3.63 ppm,  $\delta$  minor: 3.81 ppm) and found to be 7.33:1 (major syn adduct). The crude mixture was purified by column chromatography on silica gel (eluent: ethylacetate/DCM = 1/3, v/v) afforded inseparable mixture of diastereomer as white solid (48 mg, 64% yield, mp 155-157  $^\circ\text{C}$ ).  $^1\text{H}$ -NMR (300 MHz,  $\text{DMSO}-d_6$ )  $\delta$  7.74 (d,  $J$  = 5.8 Hz, 1H), 7.67 (s, 1H), 7.47 (s, 2H), 7.30 (s, 1H), 6.09 (d,  $J$  = 5.3 Hz, 1H), 4.00 (s, 1H), 1.43 (s, 3H).  $^{13}\text{C}$ -NMR (100 MHz,  $\text{CDCl}_3$ )  $\delta$  171.2, 162.6, 158.1, 145.2, 130.3, 129.9, 128.7, 122.7, 122.4, 122.2, 119.5, 91.6, 54.2, 45.3, 19.4. FTIR (KBr)  $\text{cm}^{-1}$ : 3402, 3345, 3202, 2925, 2850, 2187, 1745, 1647, 1608, 1418, 1234, 1167, 1112, 962, 828. HRMS-ESI  $[\text{M}+\text{Na}]^+$ , calcd for  $\text{C}_{15}\text{H}_{10}\text{Cl}_2\text{N}_2\text{NaO}_3$  358.9960, found 358.9964.

### 2-amino-6,8-dibromo-4-(2-methyl-5-oxo-2,5-dihydrofuran-2-yl)-4*H*-chromene-3-

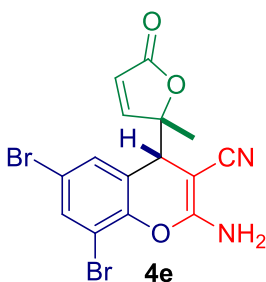

**carbonitrile (4e).** Salicylaldehyde **1e** (60 mg, 0.2 mmol), malononitrile (13.2 mg, 0.2 mmol) and  $\alpha$ -Angelica lactone **3a** (27  $\mu\text{L}$ , 0.3 mmol) were taken in 1ml of dry DCM. To this, sodium tert-butoxide (19.2 mg, 0.2 mmol) was added under nitrogen gas atmosphere. The reaction was run for 16 h. The reaction was quenched by adding water (5 ml) and the product was extracted with dichloromethane (10 ml x 3). The ratio of diastereomers were determined by  $^1\text{H}$  NMR analysis of crude reaction mixture ( $\delta$  major: 3.66 ppm,  $\delta$  minor: 3.80 ppm) and found to be 4.88:1 (major syn adduct). The crude mixture was purified by column chromatography on silica gel (eluent: ethylacetate/DCM = 1/3, v/v) afforded inseparable mixture of diastereomers as white solid (61 mg, 71% yield, mp 109-111  $^\circ\text{C}$ ).  $^1\text{H}$ -NMR (300

MHz, DMSO- $d_6$ )  $\delta$  7.83 (d,  $J$  = 3 Hz, 1H), 7.72 (d,  $J$  = 5.7 Hz, 1H), 7.50-7.39 (m, 3H), 6.08 (d,  $J$  = 5.7 Hz, 1H), 3.99 (s, 1H), 1.41 (s, 3H).  $^{13}\text{C}$ -NMR (75 MHz, DMSO- $d_6$ )  $\delta$  171.3, 163.1, 159.5, 147.0, 134.0, 131.8, 123.9, 120.8, 120.5, 115.5, 110.5, 91.7, 49.7, 43.0, 20.6. FTIR (KBr)  $\text{cm}^{-1}$ : 3455, 3346, 3201, 2926, 2853, 2187, 1742, 1645, 1520, 1415, 1245, 1173, 1078, 912. HRMS-ESI  $[\text{M}+\text{Na}]^+$ , calcd for  $\text{C}_{15}\text{H}_{10}\text{Br}_2\text{N}_2\text{NaO}_3$  446.8950, found 446.8946.

### 2-amino-7-fluoro-4-(2-methyl-5-oxo-2,5-dihydrofuran-2-yl)-4H-chromene-3-carbonitrile (4f).

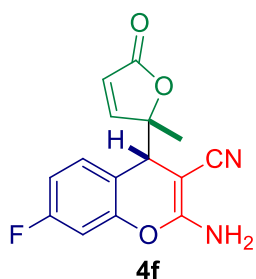

Salicylaldehyde **1f** (28 mg, 0.2 mmol), malononitrile (13.2 mg, 0.2 mmol) and  $\alpha$ -Angelica lactone **3a** (27  $\mu\text{L}$ , 0.3 mmol) were taken in 1ml of dry 1,4-dioxane. To this, sodium *tert*-butoxide (19.2 mg, 0.2 mmol) was added under nitrogen gas atmosphere. The reaction was run for 16 h. The reaction was quenched by adding water (5 ml) and the product was extracted with ethyl acetate (10 ml x 3). The ratio of diastereomers

were determined by  $^1\text{H}$  NMR analysis of crude reaction mixture ( $\delta$  major: 3.67 ppm,  $\delta$  minor: 3.76 ppm) and found to be 4.55:1 (major syn adduct). The crude mixture was purified by column chromatography on silica gel (eluent: ethylacetate/DCM = 1/3, v/v) afforded inseparable mixture of diastereomer as white solid (35 mg, 61% yield, mp 154-157  $^\circ\text{C}$ ).  $^1\text{H}$ -NMR (400 MHz, DMSO- $d_6$ )  $\delta$  7.68 (d,  $J$  = 5.7 Hz, 1H), 7.26 (s, 2H), 7.23 (dd,  $J$  = 8.4, 6.7 Hz, 1H), 7.01 (td,  $J$  = 8.6, 2.4 Hz, 1H), 6.93 (dd,  $J$  = 9.4, 2.3 Hz, 1H), 6.03 (d,  $J$  = 5.7 Hz, 1H), 3.90 (s, 1H), 1.41 (s, 3H).  $^{13}\text{C}$ -NMR (100 MHz, DMSO- $d_6$ )  $\delta$  171.5, 163.4, 162.7 ( $J_{\text{C-F}}$  = 243 Hz), 159.8, 151.3 (d,  $J_{\text{C-F}}$  = 12.4 Hz), 131.5 (d,  $J_{\text{C-F}}$  = 9.6 Hz), 121.1, 120.7, 116.4 (d,  $J_{\text{C-F}}$  = 3.1 Hz), 111.0 (d,  $J_{\text{C-F}}$  = 21 Hz), 103.6 (d,  $J_{\text{C-F}}$  = 26 Hz), 92.0, 49.9, 42.5, 20.6. FTIR (KBr)  $\text{cm}^{-1}$ : 3476, 3314, 3191, 2924, 2196, 1745, 1648, 1501, 1409, 1294, 1145, 1112, 960, 839. HRMS-ESI  $[\text{M}+\text{Na}]^+$ , calcd for  $\text{C}_{15}\text{H}_{11}\text{FN}_2\text{NaO}_3$  309.0646, found 309.0660.

### 2-amino-4-(2-methyl-5-oxo-2,5-dihydrofuran-2-yl)-6-nitro-4H-chromene-3-carbonitrile (4g).

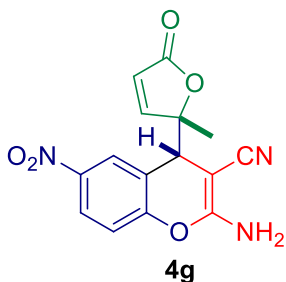

Salicylaldehyde **1g** (33.4 mg, 0.2 mmol), malononitrile (13.2 mg, 0.2 mmol) and  $\alpha$ -Angelica lactone **3a** (27  $\mu\text{L}$ , 0.3 mmol) were taken in 1ml of dry 1,4-dioxane. To this, sodium *tert*-butoxide (19.2 mg, 0.2 mmol) was added under nitrogen gas atmosphere. The reaction was run for 16 h. The reaction was quenched by adding water (5 ml) and the product was extracted with ethyl

acetate (10 ml x 3). The ratio of diastereomers were determined by  $^1\text{H}$  NMR analysis of

crude reaction mixture ( $\delta$  major: 3.77 ppm,  $\delta$  major: 3.90 ppm) and found to be 1.22:1 (major *syn* adduct). The crude mixture was purified by column chromatography on silica gel (eluent: ethylacetate/DCM = 1/3, v/v) afforded inseparable mixture of diastereomer as yellow solid (28 mg, 46% yield, mp 184-186 °C).  $^1\text{H-NMR}$  (300 MHz, DMSO- $d_6$ )  $\delta$  8.20-8.15 (m, 2H), 7.79 (d,  $J$  = 5.6 Hz, 1H), 7.47 (s, 2H), 7.29 (d,  $J$  = 8.5 Hz, 1H), 6.04 (d,  $J$  = 5.6 Hz, 1H), 4.14 (s, 1H), 1.45 (s, 3H).  $^{13}\text{C-NMR}$  (75 MHz, DMSO- $d_6$ )  $\delta$  171.2, 162.9, 159.5, 155.0, 143.0, 125.8, 124.6, 121.3, 120.9, 120.6, 117.3, 91.8, 49.3, 42.3, 20.4. FTIR (KBr)  $\text{cm}^{-1}$ : 3419, 3323, 3205, 2926, 2191, 1740, 1649, 1525, 1413, 1344, 1257, 1094, 959, 828. HRMS-ESI  $[\text{M}+\text{Na}]^+$ , calcd for  $\text{C}_{15}\text{H}_{11}\text{N}_3\text{NaO}_5$  336.0591, found 336.0591.

### 2-amino-7-methoxy-4-(2-methyl-5-oxo-2,5-dihydrofuran-2-yl)-4H-chromene-3-

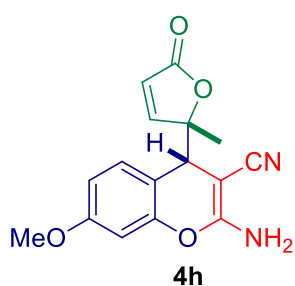

**carbonitrile (4h).** Salicylaldehyde **1h** (30.4 mg, 0.2 mmol), malononitrile (13.2 mg, 0.2 mmol) and  $\alpha$ -Angelica lactone **3a** (27  $\mu\text{L}$ , 0.3 mmol) were taken in 1ml of dry 1,4-dioxane. To this, sodium *tert*-butoxide (19.2 mg, 0.2 mmol) was added under nitrogen gas atmosphere. The reaction was run for 16 h. The reaction was quenched by adding water (5 ml) and the product was

extracted with ethyl acetate (10 ml x 3). The ratio of diastereomers were determined by  $^1\text{H}$  NMR analysis of crude reaction mixture ( $\delta$  major: 3.62 ppm,  $\delta$  minor: 3.75 ppm) and found to be 4.2:1 (major *syn* adduct). The crude mixture was purified by column chromatography on silica gel (eluent: ethylacetate/DCM = 1/3, v/v) afforded inseparable mixture of diastereomer as white solid (43 mg, 72% yield, mp 152-154 °C).  $^1\text{H-NMR}$  (300 MHz, DMSO- $d_6$ )  $\delta$  7.63 (d,  $J$  = 5.7 Hz, 1H), 7.13 (s, 2H), 7.09 (d,  $J$  = 8.6 Hz, 1H), 6.72 (dd,  $J$  = 8.5, 2.6 Hz, 1H), 6.53 (d,  $J$  = 2.5 Hz, 1H), 6.03 (d,  $J$  = 5.7 Hz, 1H), 3.90 (s, 1H), 3.78 (s, 3H), 1.39 (s, 3H).  $^{13}\text{C-NMR}$  (75 MHz, DMSO- $d_6$ )  $\delta$  171.5, 163.6, 159.8, 159.4, 151.3, 130.6, 121.3, 120.7, 111.9, 110.2, 101.1, 92.2, 55.4, 50.1, 42.6, 20.6. FTIR (KBr)  $\text{cm}^{-1}$ : 3446, 3331, 3213, 2924, 2851, 2183, 1744, 1654, 1507, 1409, 1254, 1160, 1112, 961, 815. HRMS-ESI  $[\text{M}+\text{Na}]^+$ , calcd for  $\text{C}_{16}\text{H}_{14}\text{N}_2\text{NaO}_4$  321.0846, found 321.0852.

### 2-amino-8-methoxy-4-(2-methyl-5-oxo-2,5-dihydrofuran-2-yl)-4H-chromene-3-

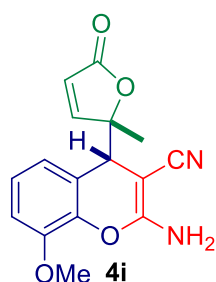

**carbonitrile (4i).** Salicylaldehyde **1i** (30.4 mg, 0.2 mmol), malononitrile (13.2 mg, 0.2 mmol) and  $\alpha$ -Angelica lactone **3a** (27  $\mu\text{L}$ , 0.3 mmol) were taken in 1ml of dry 1,4-dioxane. To this, sodium *tert*-butoxide (19.2 mg, 0.2 mmol) was added under nitrogen gas

atmosphere. The reaction was run for 16 h. The reaction was quenched by adding water (5 ml) and the product was extracted with ethyl acetate (10 ml x 3). The ratio of diastereomers were determined by  $^1\text{H}$  NMR analysis of crude reaction mixture ( $\delta$  major: 3.62 ppm,  $\delta$  minor: 3.78 ppm) and found to be 1.70:1 (major *syn* adduct). The crude mixture was purified by column chromatography on silica gel (eluent: ethylacetate/DCM = 1/3, v/v) afforded inseparable mixture of diastereomer as white solid (45 mg, 75% yield, mp 179-181 °C).

$^1\text{H}$ -NMR (400 MHz, DMSO- $d_6$ )  $\delta$  7.63 (d,  $J$  = 4.7 Hz, 1H), 7.18 (s, 2H), 7.12 – 6.95 (m, 2H), 6.76 (d,  $J$  = 6.6 Hz, 1H), 6.02 (d,  $J$  = 4.6 Hz, 1H), 3.85 (s, 1H), 3.80 (s, 3H), 1.40 (s, 3H).  $^{13}\text{C}$ -NMR (100 MHz, DMSO- $d_6$ )  $\delta$  171.5, 163.7, 159.7, 147.0, 139.9, 123.7, 121.2, 121.0, 120.6, 111.6, 92.0, 55.7, 49.6, 43.3, 20.8. FTIR (KBr)  $\text{cm}^{-1}$ : 3362, 3333, 3203, 2923, 2854, 2192, 1746, 1652, 1584, 1422, 1279, 1206, 1108, 963, 826. HRMS-ESI  $[\text{M}+\text{Na}]^+$ , calcd for  $\text{C}_{16}\text{H}_{14}\text{N}_2\text{NaO}_4$  321.0846, found 321.0849.

### 2-amino-6-methyl-4-(2-methyl-5-oxo-2,5-dihydrofuran-2-yl)-4H-chromene-3-

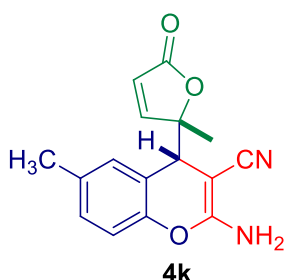

**carbonitrile (4k).** Salicylaldehyde **1k** (27.2 mg, 0.2 mmol), malononitrile (13.2 mg, 0.2 mmol) and  $\alpha$ -Angelica lactone **3a** (27  $\mu\text{L}$ , 0.3 mmol) were taken in 1ml of dry 1,4-dioxane. To this, sodium *tert*-butoxide (19.2 mg, 0.2 mmol) was added under nitrogen gas atmosphere. The reaction was run for 16 h. The reaction was quenched by adding water (5 ml) and the product was extracted with ethyl acetate (10 ml x 3). The ratio of

diastereomers were determined by  $^1\text{H}$  NMR analysis of crude reaction mixture ( $\delta$  major: 3.65 ppm,  $\delta$  minor: 3.82 ppm) and found to be 9:1 (major *syn* adduct). The crude mixture was purified by column chromatography on silica gel (eluent: ethylacetate/DCM = 1/3, v/v) afforded inseparable mixture of diastereomers as white solid (41 mg, 72% yield, mp 161-163 °C).  $^1\text{H}$ -NMR (400 MHz, DMSO- $d_6$ )  $\delta$  7.63 (d,  $J$  = 5.6 Hz, 1H), 7.15 (s, 2H), 7.15–7.07 (m, 1H), 7.00 (s, 1H), 6.91 (d,  $J$  = 8.3 Hz, 1H), 6.05 (d,  $J$  = 5.6 Hz, 1H), 3.81 (s, 1H), 2.26 (s, 3H), 1.39 (s, 3H).  $^{13}\text{C}$ -NMR (75 MHz, DMSO- $d_6$ )  $\delta$  171.5, 163.8, 159.7, 148.6, 132.9, 130.1, 129.2, 121.3, 120.7, 119.8, 115.6, 92.1, 49.6, 43.3, 20.7, 20.4. FTIR (KBr)  $\text{cm}^{-1}$ : 3418, 3328, 3205, 2927, 2856, 2188, 1749, 1648, 1428, 1255, 1189, 1107, 962, 823. HRMS-ESI  $[\text{M}+\text{Na}]^+$ , calcd for  $\text{C}_{16}\text{H}_{14}\text{N}_2\text{NaO}_3$  305.0897, found 305.0888.

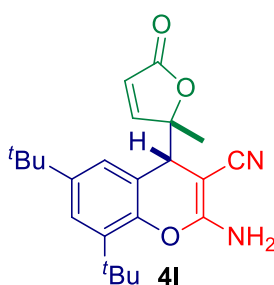

**2-amino-6,8-di-*tert*-butyl-4-(2-methyl-5-oxo-2,5-dihydrofuran-2-yl)-4H-chromene-3-carbonitrile (4l).** Salicylaldehyde **1l** (46.8

mg, 0.2 mmol), malononitrile (13.2 mg, 0.2 mmol) and  $\alpha$ -Angelica lactone **3a** (27  $\mu$ L, 0.3 mmol) were taken in 1ml of dry THF. To this, sodium *tert*-butoxide (19.2 mg, 0.2 mmol) was added under nitrogen gas atmosphere. The reaction was run for 16 h. The reaction was quenched by adding water (5 ml) and the product was extracted with ethyl acetate (10 ml x 3). The ratio of diastereomers was determined by  $^1\text{H}$  NMR analysis of crude reaction mixture ( $\delta$  major: 3.71 ppm,  $\delta$  minor: 3.81 ppm) and found to be 11.5:1 (major *syn* adduct). The crude mixture was purified by column chromatography on silica gel (eluent: ethylacetate/DCM = 1/3, v/v) afforded inseparable mixture of diastereomer as white solid (48 mg, 64% yield, mp 139-141  $^{\circ}\text{C}$ ).  $^1\text{H}$ -NMR (400 MHz,  $\text{CDCl}_3$ )  $\delta$  7.45 (d,  $J$  = 5.3 Hz, 1H), 7.29 (s, 1H), 7.01 (s, 1H), 5.99 (d,  $J$  = 5.3 Hz, 1H), 4.80 (s, 2H), 3.68 (s, 1H), 1.56 (s, 3H), 1.40 (s, 9H), 1.30 (s, 9H).  $^{13}\text{C}$ -NMR (100 MHz,  $\text{CDCl}_3$ )  $\delta$  171.7, 162.9, 158.3, 147.4, 147.1, 136.8, 125.4, 123.7, 121.9, 120.3, 119.0, 92.3, 54.6, 45.6, 35.1, 34.7, 31.5, 30.4, 20.2. FTIR (KBr)  $\text{cm}^{-1}$ : 3394, 3329, 3207, 2959, 2869, 2188, 1752, 1648, 1590, 1408, 1225, 1168, 1109, 957, 821. HRMS-ESI  $[\text{M}+\text{Na}]^+$ , calcd for  $\text{C}_{23}\text{H}_{28}\text{N}_2\text{NaO}_3$  403.1992, found 403.1995.

**2-amino-6-bromo-8-methoxy-4-(2-methyl-5-oxo-2,5-dihydrofuran-2-yl)-4H-chromene-3-carbonitrile (4m).**

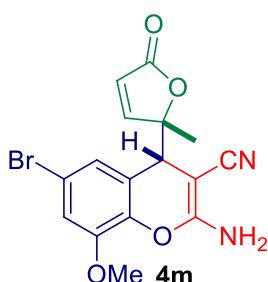

Salicylaldehyde **1m** (46.2 mg, 0.2 mmol), malononitrile (13.2 mg, 0.2 mmol) and  $\alpha$ -Angelica lactone **3a** (27  $\mu$ L, 0.3 mmol) were taken in 1ml of dry 1,4-dioxane. To this, sodium *tert*-butoxide (19.2 mg, 0.2 mmol) was added under nitrogen gas atmosphere. The reaction was run for 16 h. The reaction was quenched by adding water (5 ml) and the product was extracted with ethyl acetate (10 ml x 3). The ratio of diastereomers

was determined by  $^1\text{H}$  NMR analysis of crude reaction mixture ( $\delta$  major: 3.61 ppm,  $\delta$  minor: 3.78 ppm) and found to be 2.1:1 (major *syn* adduct). The crude mixture was purified by column chromatography on silica gel (eluent: ethylacetate/DCM = 1/3, v/v) afforded inseparable mixture of diastereomers as white solid (41 mg, 70% yield, mp 138-140  $^{\circ}\text{C}$ ).  $^1\text{H}$ -NMR (300 MHz,  $\text{DMSO}-d_6$ )  $\delta$  7.69 (d,  $J$  = 5.7 Hz, 1H), 7.29 (s, 2H), 7.20 (d,  $J$  = 2.0 Hz, 1H), 6.99 (d,  $J$  = 2.0 Hz, 1H), 6.08 (d,  $J$  = 5.7 Hz, 1H), 3.88 (s, 1H), 3.83 (s, 3H), 1.40 (s, 3H).  $^{13}\text{C}$ -NMR (100 MHz,  $\text{DMSO}-d_6$ )  $\delta$  171.9, 164.0, 160.1, 148.4, 139.8, 123.9, 123.3, 121.4, 121.1, 115.7, 115.2, 92.3, 56.7, 49.8, 43.3, 21.1. FTIR (KBr)  $\text{cm}^{-1}$ : 3404, 3325, 3203, 2925, 2854, 2187, 1752, 1651, 1575, 1483, 1421, 1263, 2114, 1098, 961, 824. HRMS-ESI  $[\text{M}+\text{Na}]^+$ , calcd for  $\text{C}_{16}\text{H}_{13}\text{BrN}_2\text{NaO}_4$  398.9951, found 398.9956.

### 2-amino-8-methoxy-4-(2-methyl-5-oxo-2,5-dihydrofuran-2-yl)-6-nitro-4H-chromene-3-carbonitrile (**4n**).

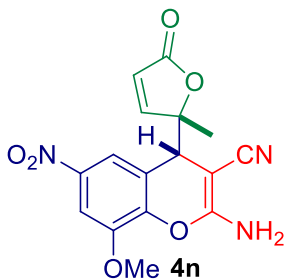

Salicylaldehyde **1n** (39.4 mg, 0.2 mmol), malononitrile (13.2 mg, 0.2 mmol) and  $\alpha$ -Angelica lactone **3a** (27  $\mu$ L, 0.3 mmol) were taken in 1ml of dry 1,4-dioxane. To this, sodium *tert*-butoxide (19.2 mg, 0.2 mmol) was added under nitrogen gas atmosphere. The reaction was run for 16 h. The reaction was quenched by adding water (5 ml) and the product was extracted with ethyl acetate (10 ml x 3). The ratio of

diastereomers were determined by  $^1\text{H}$  NMR analysis of crude reaction mixture ( $\delta$  major: 3.74 ppm,  $\delta$  minor: 3.87 ppm) and found to be 1.86:1 (major *syn* adduct). The crude mixture was purified by column chromatography on silica gel (eluent: ethylacetate/DCM = 1/3, v/v) afforded inseparable mixture of diastereomer as yellow solid (31 mg, 45% yield, mp 186-188  $^\circ\text{C}$ ).  $^1\text{H}$ -NMR (300 MHz, DMSO- $d_6$ )  $\delta$  7.78 (dd,  $J$  = 7.4, 4.1 Hz, 3H), 7.49 (s, 2H), 6.05 (d,  $J$  = 5.7 Hz, 1H), 4.11 (s, 1H), 3.94 (s, 3H), 1.44 (s, 3H).  $^{13}\text{C}$ -NMR (75 MHz, DMSO- $d_6$ )  $\delta$  171.3, 162.9, 159.5, 147.5, 144.7, 142.8, 121.5, 120.8, 120.6, 117.1, 106.6, 91.7, 56.5, 49.4, 42.6, 20.5. FTIR (KBr) cm $^{-1}$ : 3381, 3329, 2924, 2854, 2194, 1746, 1655, 1529, 1416, 1344, 1227, 1104, 960, 825. HRMS-ESI  $[\text{M}+\text{Na}]^+$ , calcd for  $\text{C}_{16}\text{H}_{13}\text{N}_3\text{NaO}_6$  366.0697, found 366.0708.

### 2-amino-4-(2-methyl-5-oxo-2,5-dihydrofuran-2-yl)-6-phenyl-4H-chromene-3-carbonitrile (**4o**).

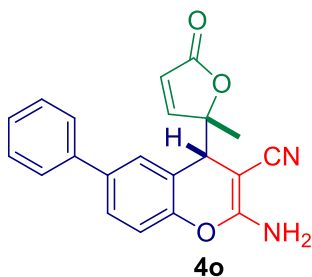

Salicylaldehyde **1o** (30.4 mg, 0.2 mmol), malononitrile (13.2 mg, 0.2 mmol) and  $\alpha$ -Angelica lactone **3a** (27  $\mu$ L, 0.3 mmol) were taken in 1ml of dry 1,4-dioxane. To this, sodium *tert*-butoxide (19.2 mg, 0.2 mmol) was added under nitrogen gas atmosphere. The reaction was run for 5 h. The reaction was quenched by adding water (5 ml) and the product

was extracted with ethyl acetate (10 ml x 3). The ratio of diastereomers were determined by  $^1\text{H}$  NMR analysis of crude reaction mixture ( $\delta$  major: 3.68 ppm,  $\delta$  minor: 3.85 ppm) and found to be 4.6:1 (major *syn* adduct). The crude mixture was purified by column chromatography on silica gel (eluent: ethylacetate/DCM = 1/3, v/v) afforded inseparable mixture of diastereomer as yellow solid (49 mg, 72% yield, mp 152-154  $^\circ\text{C}$ ).  $^1\text{H}$ -NMR (300 MHz, DMSO- $d_6$ )  $\delta$  7.77 (d,  $J$  = 5.6 Hz, 1H), 7.59 (t,  $J$  = 8.9 Hz, 3H), 7.53 – 7.40 (m, 3H), 7.37 (d,  $J$  = 6.5 Hz, 1H), 7.25 (s, 2H), 7.11 (d,  $J$  = 8.5 Hz, 1H), 6.05 (d,  $J$  = 5.6 Hz, 1H), 3.97 (s, 1H), 1.46 (s, 3H).  $^{13}\text{C}$ -NMR (75 MHz, DMSO- $d_6$ )  $\delta$  171.5, 163.7, 159.9, 150.1, 139.2,

135.8, 129.0, 128.3, 127.4, 127.0, 126.6, 126.5, 121.2, 120.6, 120.4, 116.3, 92.1, 49.6, 43.2, 20.8. FTIR (KBr)  $\text{cm}^{-1}$ : 3395, 3323, 3198, 2985, 2928, 2189, 1746, 1644, 1577, 1455, 1409, 1345, 1287, 1110, 1049, 961, 822. HRMS-ESI  $[\text{M}+\text{Na}]^+$ , calcd for  $\text{C}_{21}\text{H}_{16}\text{N}_2\text{NaO}_3$  367.1053, found 367.1064.

**2-amino-6-(4-fluorophenyl)-4-(2-methyl-5-oxo-2,5-dihydrofuran-2-yl)-4H-chromene-3-carbonitrile (4p).**

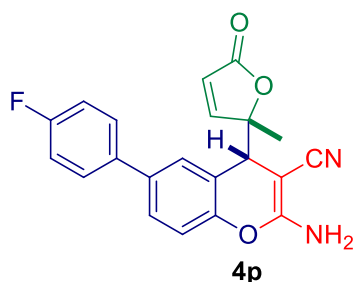

Salicylaldehyde **1p** (43.2 mg, 0.2 mmol), malononitrile (13.2 mg, 0.2 mmol) and  $\alpha$ -Angelica lactone **3a** (27  $\mu\text{L}$ , 0.3 mmol) were taken in 1ml of dry 1,4-dioxane. To this, sodium *tert*-butoxide (19.2 mg, 0.2 mmol) was added under nitrogen gas atmosphere. The reaction was run for 5 h. The reaction was quenched by adding water (5 ml) and the

product was extracted with ethyl acetate (10 ml x 3). The ratio of diastereomers were determined by  $^1\text{H}$  NMR analysis of crude reaction mixture ( $\delta$  major: 3.71 ppm,  $\delta$  minor: 3.91 ppm) and found to be 4.9:1 (major syn adduct). The crude mixture was purified by column chromatography on silica gel (eluent: ethylacetate/DCM = 1/3, v/v) afforded inseparable mixture of diastereomer as white solid (47 mg, 65% yield, mp 167-169  $^\circ\text{C}$ ).  $^1\text{H}$ -NMR (400 MHz,  $\text{DMSO-d}_6$ )  $\delta$  7.76 (d,  $J$  = 5.5 Hz, 1H), 7.64 (d,  $J$  = 2.5 Hz, 2H), 7.58 – 7.50 (m, 1H), 7.47 (s, 1H), 7.30 (t,  $J$  = 8.7 Hz, 2H), 7.24 (s, 2H), 7.11 (d,  $J$  = 8.4 Hz, 1H), 6.05 (d,  $J$  = 5.5 Hz, 1H), 3.95 (s, 1H), 1.46 (s, 3H).  $^{13}\text{C}$ -NMR (75 MHz,  $\text{DMSO-d}_6$ )  $\delta$  171.47, 163.68, 163.41 (d,  $J_{\text{C-F}}$  = 240 Hz), 159.89, 150.09, 135.7 (d,  $J_{\text{C-F}}$  = 3 Hz), 134.8, 128.6, 128.5, 128.2, 127.0, 121.2, 120.6 (d,  $J_{\text{C-F}}$  = 9.8 Hz), 116.4, 115.9 (d,  $J_{\text{C-F}}$  = 22 Hz), 92.0, 62.0, 49.6, 43.2, 20.8. FTIR (KBr)  $\text{cm}^{-1}$ : 3476, 3315, 3202, 2923, 2855, 2189, 1746, 1645, 1520, 1408, 1295, 1174, 1108, 962, 822. HRMS-ESI  $[\text{M}+\text{Na}]^+$ , calcd for  $\text{C}_{21}\text{H}_{15}\text{FN}_2\text{NaO}_3$  385.0959, found 385.0954.

**2-amino-4-(2-methyl-5-oxo-2,5-dihydrofuran-2-yl)-6-(4-(trifluoromethyl)phenyl)-4H-chromene-3-carbonitrile (4q).**

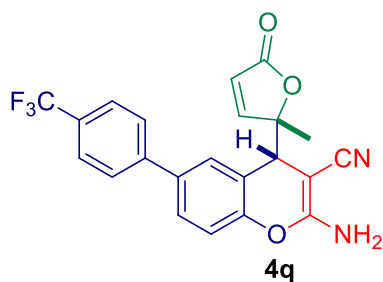

Salicylaldehyde **1q** (53.2 mg, 0.2 mmol), malononitrile (13.2 mg, 0.2 mmol) and  $\alpha$ -Angelica lactone (27  $\mu\text{L}$ , 0.3 mmol) were taken in 1ml of dry 1,4-dioxane. To this, sodium *tert*-butoxide (19.2 mg, 0.2 mmol) was added under nitrogen gas atmosphere. The reaction was run for 5 h. The reaction was quenched by

adding water (5 ml) and the product was extracted with ethyl acetate (10 ml x 3). The ratio of diastereomers were determined by  $^1\text{H}$  NMR analysis of crude reaction mixture ( $\delta$  major: 3.77

ppm,  $\delta$  minor: 3.97 ppm) and found to be 7.3:1 (major *syn* adduct). The crude mixture was purified by column chromatography on silica gel (eluent: ethylacetate/DCM = 1/3, v/v) afforded inseparable mixture of diastereomer as white solid (62 mg, 75% yield, mp 165 °C).  $^1\text{H-NMR}$  (400 MHz, DMSO- $d_6$ )  $\delta$  7.91–7.78 (m, 4H), 7.77 (d,  $J$  = 5.7 Hz, 1H), 7.67 (dd,  $J$  = 8.5, 1.9 Hz, 1H), 7.58 (d,  $J$  = 2.0 Hz, 1H), 7.28 (s, 2H), 7.16 (d,  $J$  = 8.5 Hz, 1H), 6.04 (d,  $J$  = 5.7 Hz, 1H), 3.99 (s, 1H), 1.47 (s, 3H).  $^{13}\text{C-NMR}$  (75 MHz, DMSO- $d_6$ )  $\delta$  171.5, 163.6, 159.9, 150.8, 143.1, 134.1, 128.8, 128.0, 127.5, 127.3, 126.1, 125.9 (q,  $J_{\text{C-F}}$  = 3.75 Hz), 122.5, 121.2, 120.7, 120.6, 116.6, 92.0, 62.0, 49.6, 43.1, 20.7. FTIR (KBr)  $\text{cm}^{-1}$ : 3478, 3314, 3191, 2924, 2855, 2188, 1745, 1644, 1502, 1410, 1298, 1148, 1112, 1040, 961. 841. HRMS-ESI  $[\text{M}+\text{K}]^+$ , calcd for  $\text{C}_{22}\text{H}_{15}\text{F}_3\text{N}_2\text{KO}_3$  451.0666, found 3451.0653.

### 2-amino-4-(2-methyl-5-oxo-2,5-dihydrofuran-2-yl)-6-(thiophen-2-yl)-4H-chromene-3-

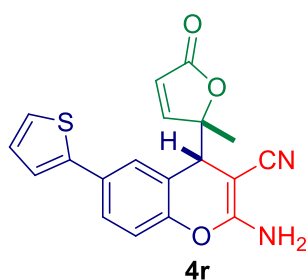

**carbonitrile (4r).** Salicylaldehyde **1r** (40.8 mg, 0.2 mmol), malononitrile (13.2 mg, 0.2 mmol) and  $\alpha$ -Angelica lactone (27  $\mu\text{L}$ , 0.3 mmol) were taken in 1ml of dry 1,4-dioxane. To this, sodium *tert*-butoxide (19.2 mg, 0.2 mmol) was added under nitrogen gas atmosphere. The reaction was run for 24 h. The reaction was quenched by adding water (5 ml) and the product

was extracted with ethyl acetate (10 ml x 3). The ratio of diastereomers were determined by  $^1\text{H}$  NMR analysis of crude reaction mixture ( $\delta$  major: ppm,  $\delta$  minor: ppm) and found to be 5.66:1 (major *syn* adduct). The crude mixture was purified by column chromatography on silica gel (eluent: ethylacetate/DCM = 1/3, v/v) afforded inseparable mixture of diastereomer as yellow solid (49 mg, 70% yield, mp 148-150 °C).  $^1\text{H-NMR}$  (300 MHz, DMSO- $d_6$ )  $\delta$  7.74 (d,  $J$  = 5.7 Hz, 1H), 7.58 – 7.52 (m, 2H), 7.48 (s, 1H), 7.42 (d,  $J$  = 2.8 Hz, 1H), 7.23 (s, 2H), 7.14 – 7.12 (m, 1H), 7.07 (d,  $J$  = 8.5 Hz, 1H), 6.04 (d,  $J$  = 5.6 Hz, 1H), 3.95 (s, 1H), 1.45 (s, 3H).  $^{13}\text{C-NMR}$  (75 MHz, DMSO- $d_6$ )  $\delta$  171.4, 163.6, 159.8, 149.9, 142.3, 129.5, 128.5, 126.9, 125.9, 125.7, 123.7, 121.1, 120.7, 120.6, 116.6, 92.0, 49.5, 43.0, 20.7. FTIR (KBr)  $\text{cm}^{-1}$ : 3458, 3338, 3198, 2923, 2854, 2183, 1747, 1645, 1504, 1410, 1291, 1142, 961, 840. HRMS-ESI  $[\text{M}+\text{Na}]^+$ , calcd for  $\text{C}_{19}\text{H}_{14}\text{N}_2\text{NaO}_3\text{S}$  373.0617, found 373.0628.

### 3-amino-1-(2-methyl-5-oxo-2,5-dihydrofuran-2-yl)-1H-benzo[f]chromene-2-carbonitrile

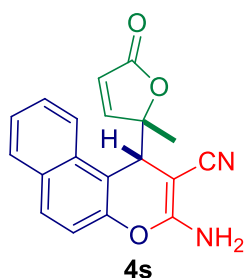

**(4s).** Salicylaldehyde **1s** (30.4 mg, 0.2 mmol), malononitrile (13.2 mg, 0.2 mmol) and  $\alpha$ -Angelica lactone **3a** (27  $\mu\text{L}$ , 0.3 mmol) were taken in 1ml of dry 1,4-dioxane. To this, sodium *tert*-butoxide (19.2

mg, 0.2 mmol) was added under nitrogen gas atmosphere. The reaction was run for 24 h. The reaction was quenched by adding water (5 ml) and the product was extracted with ethyl acetate (10 ml x 3). The ratio of diastereomers was determined by  $^1\text{H}$  NMR analysis of crude reaction mixture ( $\delta$  major: 4.57 ppm,  $\delta$  minor: 4.47 ppm) and found to be 4:1 (major syn adduct). The crude mixture was purified by column chromatography on silica gel (eluent: ethylacetate/DCM = 1/3, v/v) afforded inseparable mixture of diastereomer as yellow solid (34 mg, 54% yield, mp 146-148 °C).  $^1\text{H}$ -NMR (400 MHz, DMSO- $d_6$ )  $\delta$  8.22 (d,  $J$  = 8.3 Hz, 1H), 7.98–7.80 (m, 2H), 7.60 (d,  $J$  = 4.7 Hz, 2H), 7.48 (d,  $J$  = 6.4 Hz, 1H), 7.31 (s, 2H), 7.24 (d,  $J$  = 8.6 Hz, 1H), 5.61 (d,  $J$  = 5.0 Hz, 1H), 4.62 (s, 1H), 1.54 (s, 3H).  $^{13}\text{C}$ -NMR (100 MHz, DMSO- $d_6$ )  $\delta$  171.4, 164.1, 159.2, 149.0, 130.7, 130.4, 129.4, 128.4, 126.9, 124.9, 123.9, 121.4, 119.3, 116.6, 113.8, 93.0, 50.4, 39.0, 21.0. FTIR (KBr)  $\text{cm}^{-1}$ : 3446, 3325, 3205, 2925, 2854, 2183, 1744, 1643, 1585, 1415, 1243, 1107, 959, 818. HRMS-ESI  $[\text{M}+\text{Na}]^+$ , calcd for  $\text{C}_{19}\text{H}_{14}\text{N}_2\text{NaO}_3$  341.0896, found 341.0902.

#### 2-amino-4-(2-ethyl-5-oxo-2,5-dihydrofuran-2-yl)-6-methyl-4H-chromene-3-carbonitrile

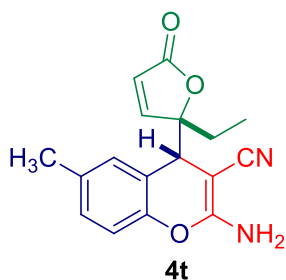

(**4t**). Salicylaldehyde **1k** (27.2 mg, 0.2 mmol), malononitrile (13.2 mg, 0.2 mmol) and 5-ethylfuran-2(3*H*)-one **3b** (33.6 mg, 0.3 mmol) were taken in 1ml of dry 1,4-dioxane. To this, sodium tert-butoxide (19.2 mg, 0.2 mmol) was added under nitrogen gas atmosphere. The reaction was run for 16 h. The reaction was quenched by adding water (5 ml) and the product

was extracted with ethyl acetate (10 ml x 3). The ratio of diastereomers were determined by  $^1\text{H}$  NMR analysis of crude reaction mixture ( $\delta$  major: 3.68 ppm,  $\delta$  minor: 3.85 ppm) and found to be 4:1 (major syn adduct). The crude mixture was purified by column chromatography on silica gel (eluent: ethylacetate/DCM = 1/3, v/v) afforded inseparable mixture of diastereomer as sticky solid (35 mg, 60% yield).  $^1\text{H}$ -NMR (400 MHz,  $\text{CDCl}_3$ )  $\delta$  7.40 (d,  $J$  = 5.3 Hz, 1H), 6.99 (s, 2H), 6.84 (d,  $J$  = 8.0 Hz, 1H), 4.81 (s, 2H), 3.61 (s, 1H), 2.27 (s, 3H), 2.08 – 1.82 (m, 2H), 0.63 (t,  $J$  = 7.1 Hz, 3H).  $^{13}\text{C}$ -NMR (100 MHz,  $\text{CDCl}_3$ )  $\delta$  171.1, 163.3, 157.2, 155.7, 148.7, 134.9, 134.7, 130.6, 129.9, 129.7, 124.1, 123.2, 118.8, 116.1, 115.9, 95.1, 54.3, 44.9, 29.8, 21.0, 7.3. FTIR (KBr)  $\text{cm}^{-1}$ : 3448, 3325, 3199, 2924, 2854, 2188, 1749, 1648, 1428, 1255, 1189, 1107, 962, 823. HRMS-ESI  $[\text{M}+\text{Na}]^+$ , calcd for  $\text{C}_{16}\text{H}_{14}\text{N}_2\text{NaO}_3$  305.0897, found 305.0896.

### 2-amino-6-methyl-4-(5-oxo-2-propyl-2,5-dihydrofuran-2-yl)-4H-chromene-3-

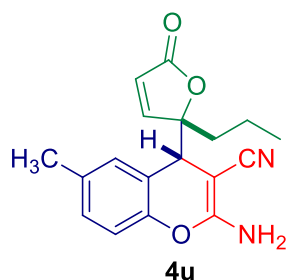

**carbonitrile (4u).** Salicylaldehyde **1k** (27.2 mg, 0.2 mmol), malononitrile (13.2 mg, 0.2 mmol) and 5-propylfuran-2(3H)-one **3c** (37.8 mg, 0.3 mmol) were taken in 1ml of dry 1,4-dioxane. To this, sodium *tert*-butoxide (19.2 mg, 0.2 mmol) was added under nitrogen gas atmosphere. The reaction was run for 12 h. The reaction was quenched by adding water (5 ml) and the product was extracted with ethyl acetate (10 ml x 3). The ratio of

diastereomers were determined by  $^1\text{H}$  NMR analysis of crude reaction mixture ( $\delta$  major: 3.65 ppm,  $\delta$  minor: 3.78 ppm) and found to be 7.33:1 (major syn adduct). The crude mixture was purified by column chromatography on silica gel (eluent: ethylacetate/DCM = 1/3, v/v) afforded inseparable mixture of diastereomer as sticky solid (43 mg, 65% yield).  $^1\text{H}$ -NMR (400 MHz,  $\text{CDCl}_3$ )  $\delta$  7.50 (d,  $J$  = 5.2 Hz, 1H), 7.10 – 7.05 (m, 2H), 6.91 (d,  $J$  = 8.1 Hz, 1H), 6.11 (d,  $J$  = 5.5 Hz, 1H), 4.95 (s, 2H), 3.65 (s, 1H), 2.34 (s, 3H), 1.76-1.54 (m, 2H), 1.31 – 1.04 (m, 2H), 0.82 (t,  $J$  = 7.0 Hz, 3H).  $^{13}\text{C}$ -NMR (100 MHz,  $\text{CDCl}_3$ )  $\delta$  172.1, 163.4, 157.6, 148.7, 134.9, 130.6, 129.9, 122.8, 120.5, 118.8, 116.2, 94.9, 54.3, 45.1, 33.5, 21.0, 16.5, 14.2. FTIR (KBr)  $\text{cm}^{-1}$ : 3444, 3332, 3216, 2928, 2852, 2184, 1744, 1655, 1616, 1508, 1408, 1256, 1162, 961, 825. HRMS-ESI  $[\text{M}+\text{Na}]^+$ , calcd for  $\text{C}_{18}\text{H}_{18}\text{N}_2\text{NaO}_3$  333.1210, found 333.1220.

### 2-amino-6-methyl-4-(4-methyl-5-oxo-2-propyl-2,5-dihydrofuran-2-yl)-4H-chromene-3-

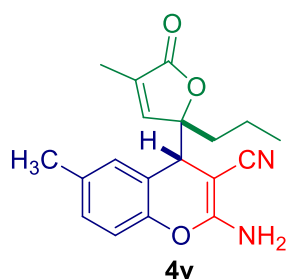

**carbonitrile (4v).** Salicylaldehyde **1k** (27.2 mg, 0.2 mmol), malononitrile (13.2 mg, 0.2 mmol) and 3-methyl-5-propylfuran-2(3H)-one **3d** (42 mg, 0.3 mmol) were taken in 1ml of dry 1,4-dioxane. To this, sodium *tert*-butoxide (19.2 mg, 0.2 mmol) was added under nitrogen gas atmosphere. The reaction was run for 16 h. The reaction was quenched by adding water (5 ml) and the

product was extracted with ethyl acetate (10 ml x 3). The ratio of diastereomers were determined by  $^1\text{H}$  NMR analysis of crude reaction mixture ( $\delta$  major: 3.79 ppm,  $\delta$  minor: 3.59 ppm) and found to be 2.33:1 (major syn adduct). The crude mixture was purified by column chromatography on silica gel (eluent: ethylacetate/DCM = 1/3, v/v) afforded inseparable mixture of diastereomer as sticky solid (42 mg, 65% yield).  $^1\text{H}$ -NMR (300 MHz,  $\text{CDCl}_3$ )  $\delta$  7.06 – 6.97 (m, 2H), 6.85-6.77 (m, 2H), 4.90 (s, 2H), 3.78 (s, 1H), 2.39-2.30 (m, 6H), 1.89 (t,  $J$  = 14.0 Hz, 4H), 0.92 (t,  $J$  = 7.3 Hz, 3H).  $^{13}\text{C}$ -NMR (75 MHz,  $\text{CDCl}_3$ )  $\delta$  173.2, 163.1, 149.9, 148.5, 148.4, 134.5, 132.3, 130.5, 129.5, 118.9, 115.7, 91.8, 54.4, 45.1, 36.2, 21.0, 20.9, 17.0,

14.2. FTIR (KBr)  $\text{cm}^{-1}$ : 3456, 3401, 3314, 3195, 2975, 2927, 2186, 1742, 1748, 1658, 1418, 1265, 1190, 1112, 1047, 963, 822. HRMS-ESI  $[\text{M}+\text{K}]^+$ , calcd for  $\text{C}_{19}\text{H}_{20}\text{N}_2\text{KO}_3$  363.1106, found 363.1111.

**2-amino-4-(5-oxo-2,5-dihydrofuran-2-yl)-4H-chromene-3-carbonitrile (6a).**

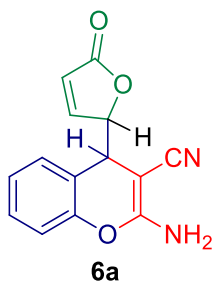

Salicylaldehyde **1a** (24.4 mg, 0.2 mmol), malononitrile (13.2 mg, 0.2 mmol) and  $\gamma$ -crotonolactone **5a** (21.3  $\mu\text{L}$ , 0.3 mmol) were taken in 1 ml of dry 1,4-dioxane. To this, sodium tert-butoxide (19.2 mg, 0.2 mmol) was added under nitrogen gas atmosphere. The reaction was run for 16 h. The reaction was quenched by adding water (5 ml) and the product was extracted with ethyl acetate (10 ml x 3). The ratio of diastereomers were determined by  $^1\text{H}$  NMR analysis of crude reaction mixture ( $\delta$  major: 3.82 (d,  $J = 5.1$  Hz) ppm,  $\delta$  minor: 4.05 (d,  $J = 3.0$  Hz) and found to be 3.8:1 (major:minor). The crude mixture was purified by column chromatography on silica gel (eluent: ethylacetate/DCM = 1/3, v/v) afforded inseparable mixture of diastereomer as yellow solid (30.5 mg, 60% yield, mp 124-126  $^\circ\text{C}$ ).  $^1\text{H}$ -NMR (300 MHz,  $\text{CDCl}_3$ )  $\delta$  7.46 (d,  $J = 5.8$  Hz, 1H), 7.33-7.27 (m, 1H), 7.19-7.12 (m, 2H), 7.03 (d,  $J = 8.2$  Hz, 1H), 6.18 (dd,  $J = 6.0$  Hz, 2.0 Hz, 1H), 5.08 (d,  $J = 5.4$  Hz, 1H), 3.89 (d,  $J = 5.5$  Hz, 1H).  $^{13}\text{C}$ -NMR (75 MHz,  $\text{CDCl}_3$ )  $\delta$  172.2, 162.4, 153.1, 152.7, 150.0, 129.6, 128.7, 125.1, 124.0, 118.1, 116.8, 86.6, 53.5, 39.7. FTIR (KBr)  $\text{cm}^{-1}$ : 3434, 3335, 3199, 2924, 2855, 2185, 1746, 1641, 1582, 1416, 1227, 1175, 1097, 916, 762. HRMS-ESI  $[\text{M}+\text{Na}]^+$ , calcd for  $\text{C}_{14}\text{H}_{10}\text{N}_2\text{NaO}_3$  277.0584, found 277.0583.

**2-amino-6-bromo-4-(5-oxo-2,5-dihydrofuran-2-yl)-4H-chromene-3-carbonitrile (6b).**

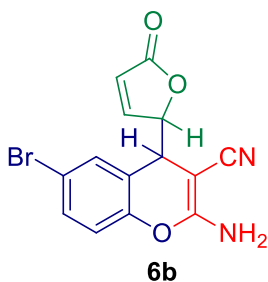

Salicylaldehyde **1c** (40 mg, 0.2 mmol), malononitrile (13.2 mg, 0.2 mmol) and  $\gamma$ -crotonolactone **5a** (21.3  $\mu\text{L}$ , 0.3 mmol) were taken in 1 ml of dry 1,4-dioxane. To this, sodium tert-butoxide (19.2 mg, 0.2 mmol) was added under nitrogen gas atmosphere. The reaction was run for 16 h. The reaction was quenched by adding water (5 ml) and the product was extracted with ethyl acetate (10 ml x 3). The ratio of diastereomers were determined by  $^1\text{H}$  NMR analysis of crude reaction mixture ( $\delta$  major: 4.07 (d,  $J = 3.0$  Hz) ppm,  $\delta$  minor: 3.88 (d,  $J = 5.2$  Hz) ppm) and found to be 1.77:1 (major:minor). The crude mixture was purified by column chromatography on silica gel (eluent: ethylacetate/DCM = 1/3, v/v) afforded inseparable mixture of diastereomer as yellow solid (40 mg, 61% yield, mp 145-147  $^\circ\text{C}$ ).  $^1\text{H}$ -NMR (400 MHz,  $\text{DMSO}-d_6$ )  $\delta$  7.63 (d,  $J = 4.0$

Hz, 1H), 7.49 (s, 2H), 7.19 (s, 2H), 7.00 (d,  $J = 8.0$  Hz, 1H), 6.24 (d,  $J = 3.8$  Hz, 1H), 5.27 (s, 1H), 4.10 (s, 1H).  $^{13}\text{C}$ -NMR (100 MHz, DMSO- $d_6$ )  $\delta$  172.2, 162.6, 155.1, 149.5, 131.8, 131.8, 122.4, 120.8, 120.0, 118.3, 115.5, 86.2, 49.3, 38.0. FTIR (KBr)  $\text{cm}^{-1}$ : 3434, 3335, 3199, 2924, 2855, 2185, 1746, 1641, 1582, 1416, 1227, 1175, 1097, 916, 762. HRMS-ESI  $[\text{M}+\text{Na}]^+$ , calcd for  $\text{C}_{14}\text{H}_9\text{BrN}_2\text{NaO}_3$  354.9688, found 354.9694.

**2-amino-6-methyl-4-(5-oxo-2,5-dihydrofuran-2-yl)-4H-chromene-3-carbonitrile (6c).**

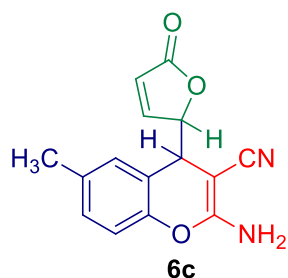

Salicylaldehyde **1k** (27.2 mg, 0.2 mmol), malononitrile (13.2 mg, 0.2 mmol) and  $\gamma$ -crotonolactone **5a** (21.3  $\mu\text{L}$ , 0.3 mmol) were taken in 1 ml of dry 1,4-dioxane. To this, sodium tert-butoxide (9.6 mg, 0.1 mmol) was added under nitrogen gas atmosphere. The reaction was run for 16 h. The reaction was quenched by adding water (5 ml) and the product was extracted with ethyl acetate (10 ml x 3). The ratio of diastereomers were determined by  $^1\text{H}$  NMR analysis of crude reaction mixture ( $\delta$  major: 3.78 (d,  $J = 5.4$  Hz) ppm,  $\delta$  minor: 4.05 (d,  $J = 3.0$  Hz) ppm) and found to be 1.8:1 (major:minor). The crude mixture was purified by column chromatography on silica gel (eluent: ethylacetate/DCM = 1/3, v/v) afforded inseparable mixture of diastereomer as yellow solid (30 mg, 56% yield, mp 124-126  $^\circ\text{C}$ ).  $^1\text{H}$ -NMR (500 MHz,  $\text{CDCl}_3$ )  $\delta$  7.47 – 7.35 (m, 1H), 7.10 – 7.06 (m, 1H), 6.98 (d,  $J = 14.6$  Hz, 1H), 6.91 (d,  $J = 8.3$  Hz, 1H), 6.18 (dd,  $J = 5.7, 1.7$  Hz, 1H), 5.07 (d,  $J = 5.5$  Hz, 1H), 4.97 (d,  $J = 4.9$  Hz, 2H), 3.86 (d,  $J = 5.5$  Hz, 1H), 2.30 (s, 3H).  $^{13}\text{C}$ -NMR (100 MHz,  $\text{CDCl}_3$ )  $\delta$  172.3, 162.6, 153.1, 147.9, 134.9, 130.1, 129.6, 128.8, 123.9, 117.8, 116.5, 86.7, 53.2, 39.7, 20.9. FTIR (KBr)  $\text{cm}^{-1}$ : 3445, 3325, 3198, 2923, 2853, 2178, 1741, 1642, 1412, 1252, 1165, 1107, 965, 821. HRMS-ESI  $[\text{M}+\text{Na}]^+$ , calcd for  $\text{C}_{15}\text{H}_{12}\text{N}_2\text{NaO}_3$  291.0740, found 291.0740.

**2-amino-4-(3-methyl-5-oxo-2,5-dihydrofuran-2-yl)-4H-chromene-3-carbonitrile (6d).**

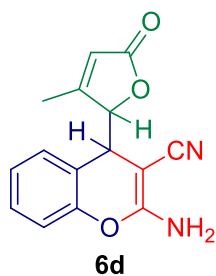

Salicylaldehyde **1a** (24.4 mg, 0.2 mmol), malononitrile (13.2 mg, 0.2 mmol) and 4-methylfuran-2(5H)-one **5b** (29.4 mg, 0.3 mmol) were taken in 1 ml of dry 1,4-dioxane. To this, sodium tert-butoxide (19.2 mg, 0.2 mmol) was added under nitrogen gas atmosphere. The reaction was run for 16 h. The reaction was quenched by adding water (5 ml) and the product was extracted with ethyl acetate (10 ml x 3). The ratio of diastereomers were determined by  $^1\text{H}$  NMR analysis of crude reaction mixture ( $\delta$  major: 5.69 ppm,  $\delta$  minor: 5.87 ppm) and found to be 2.3:1 (major *syn* adduct).

The crude mixture was purified by column chromatography on silica gel (eluent: ethylacetate/DCM = 1/3, v/v) afforded inseparable mixture of diastereomer as yellow solid (24 mg, 51% yield, mp 124-126 °C). <sup>1</sup>H-NMR (300 MHz, DMSO-*d*<sub>6</sub>) δ 7.49 (d, *J* = 7.6 Hz, 0.5H), 7.39 – 7.16 (m, 2H), 7.18 – 6.94 (m, 4.5H), 5.83 (d, *J* = 1.4 Hz, 1H), 5.09 (d, *J* = 5.8 Hz, 1H), 4.18 (d, *J* = 2.1 Hz, 1H), 2.09 (s, 3H). <sup>13</sup>C-NMR (75 MHz, DMSO-*d*<sub>6</sub>) δ 171.9, 167.2, 162.7, 150.4, 129.0, 128.7, 123.8, 120.3, 118.0, 117.1, 115.9, 87.6, 50.5, 37.2, 14.0. FTIR (KBr) cm<sup>-1</sup>: 3448, 3328, 3198, 2928, 2851, 2172, 1748, 1648, 1412, 1265, 1147, 1105, 961, 828. HRMS-ESI [M+Na]<sup>+</sup>, calcd for C<sub>15</sub>H<sub>12</sub>N<sub>2</sub>NaO<sub>3</sub> 291.0746, found 291.0740.

### 2-amino-6-bromo-4-(3-methyl-5-oxo-2,5-dihydrofuran-2-yl)-4*H*-chromene-3-

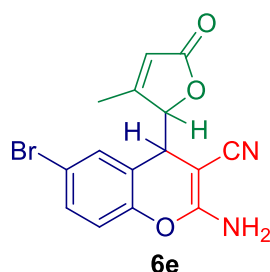

**carbonitrile (6e).** Salicylaldehyde **1c** (40 mg, 0.2 mmol), malononitrile (13.2 mg, 0.2 mmol) and 4-methylfuran-2(5*H*)-one **5b** (29.4 mg, 0.3 mmol) were taken in 1ml of dry 1,4-dioxane. To this, sodium *tert*-butoxide (19.2 mg, 0.2 mmol) was added under nitrogen gas atmosphere. The reaction was run for 16 h. The reaction was quenched by adding water (5 ml) and the product

was extracted with ethyl acetate (10 ml x 3). The ratio of diastereomers were determined by <sup>1</sup>H NMR analysis of crude reaction mixture (δ major: 5.83 ppm, δ minor: 6.00 ppm) and found to be 2.3:1 (*major:minor*). The crude mixture was purified by column chromatography on silica gel (eluent: ethylacetate/DCM = 1/3, v/v) afforded inseparable mixture of diastereomers as yellow solid (37 mg, 53% yield, mp 124-126 °C). <sup>1</sup>H-NMR (300 MHz, DMSO-*d*<sub>6</sub>) δ 7.80 (d, *J* = 2.0 Hz, 0.5H), 7.51 – 7.45 (m, 1H), 7.24 – 7.22 (m, 2H), 7.18 (s, 0.5H), 6.99 (t, *J* = 8.1 Hz, 1H), 5.90 (s, 1H), 5.13 (s, 1H), 4.20 (s, 1H), 2.09 (s, 3H). <sup>13</sup>C-NMR (75 MHz, DMSO-*d*<sub>6</sub>) δ 171.8, 167.1, 162.5, 149.7, 131.8, 131.0, 120.0, 119.8, 118.1, 115.3, 87.5, 50.2, 37.0, 14.0. FTIR (KBr) cm<sup>-1</sup>: 3398, 3328, 3095, 2922, 2851, 2182, 1756, 1648, 1604, 1408, 1265, 1189, 1107, 923, 824. HRMS-ESI [M+Na]<sup>+</sup>, calcd for C<sub>15</sub>H<sub>11</sub>BrN<sub>2</sub>NaO<sub>3</sub> 368.9845, found 368.9851.

### 2-amino-6-methyl-4-(3-methyl-5-oxo-2,5-dihydrofuran-2-yl)-4*H*-chromene-3-

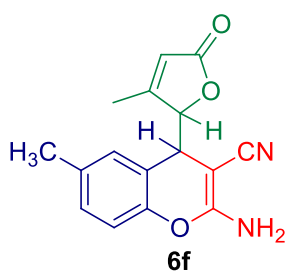

**carbonitrile (6f).** Salicylaldehyde **1k** (27.2 mg, 0.2 mmol), malononitrile (13.2 mg, 0.2 mmol) and 4-methylfuran-2(5*H*)-one **5b** (29.4 mg, 0.3 mmol) were taken in 1ml of dry 1,4-dioxane. To this, sodium *tert*-butoxide (9.6 mg, 0.1 mmol) was added under nitrogen gas atmosphere. The reaction was run for 16 h. The ratio

of diastereomers was determined by  $^1\text{H}$  NMR analysis of crude reaction mixture ( $\delta$  major: 5.78 ppm,  $\delta$  minor: 5.98 ppm) and found to be 3.3:1 (major:minor). The crude mixture was purified by column chromatography on silica gel (eluent: ethylacetate/DCM = 1/3, v/v) afforded inseparable mixture of diastereomer as yellow solid (31 mg, 55% yield, mp 124-126 °C).  $^1\text{H}$ -NMR (300 MHz,  $\text{CDCl}_3$ )  $\delta$  7.07 – 7.03 (m, 1H), 6.88 (d,  $J$  = 8.3 Hz, 1H), 6.67 (s, 1H), 5.78 – 5.77 (m, 1H), 5.03 (s, 1H), 4.89 (s, 2H), 4.01 (d,  $J$  = 3.0 Hz, 1H), 2.27 (s, 3H), 2.08 (d,  $J$  = 0.7 Hz, 3H).  $^{13}\text{C}$ -NMR (75 MHz,  $\text{CDCl}_3$ )  $\delta$  172.3, 165.2, 162.4, 148.5, 134.2, 130.2, 128.3, 119.6, 116.6, 116.0, 87.8, 54.1, 38.1, 20.9, 14.6. FTIR (KBr)  $\text{cm}^{-1}$ : 3444, 3326, 3202, 2922, 2858, 2182, 1744, 1641, 1423, 1251, 1182, 1102, 965, 828. HRMS-ESI  $[\text{M}+\text{Na}]^+$ , calcd for  $\text{C}_{16}\text{H}_{14}\text{N}_2\text{NaO}_3$  305.0896, found 305.0901.

### 2-amino-4-(5-oxo-3-phenyl-2,5-dihydrofuran-2-yl)-4H-chromene-3-carbonitrile (6g).

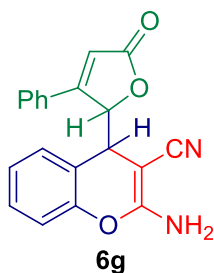

Salicylaldehyde **1a** (24.4 mg, 0.2 mmol), malononitrile (13.2 mg, 0.2 mmol) and 4-phenylfuran-2(5*H*)-one **5c** (29.4 mg, 0.3 mmol) were taken in 1ml of dry 1,4-dioxane. To this, sodium *tert*-butoxide (19.2 mg, 0.2 mmol) was added under nitrogen gas atmosphere. The reaction was run for 16 h. The reaction was quenched by adding water (5 ml) and the product was extracted with ethyl acetate (10 ml x 3).

The ratio of diastereomers was determined by  $^1\text{H}$  NMR analysis of crude reaction mixture ( $\delta$  major: 4.07 ppm,  $\delta$  minor: 4.12 ppm) and found to be 1.5:1. The crude mixture was purified by column chromatography on silica gel (eluent: ethylacetate/DCM = 1/3, v/v) afforded inseparable mixture of diastereomer as solid (35 mg, 54% yield).  $^1\text{H}$ -NMR (300 MHz,  $\text{CDCl}_3$ )  $\delta$  7.53 (s, 5H), 7.34-7.18 (m, 2H), 6.98-6.92 (m, 1.5H), 6.49 (d,  $J$  = 9 Hz, 0.5H), 6.16 (s, 1H), 5.71 (s, 1H), 4.87 (s, 2H), 4.07 (s, 1H).  $^{13}\text{C}$ -NMR (75 MHz,  $\text{CDCl}_3$ )  $\delta$  171.8, 164.3, 162.4, 150.8, 150.1, 131.9, 129.9, 129.5, 129.3, 128.5, 128.0, 127.7, 127.3, 125.5, 124.2, 117.6, 116.8, 116.4, 115.9, 84.9, 77.6, 77.4, 77.2, 76.7, 55.2, 39.4. FTIR (KBr)  $\text{cm}^{-1}$ : 3454, 3315, 3198, 2928, 2856, 2187, 1744, 1647, 1608, 1417, 1268, 1148, 1054, 963, 841. HRMS-ESI  $[\text{M}+\text{K}]^+$ , calcd for  $\text{C}_{20}\text{H}_{14}\text{KN}_2\text{O}_3$  369.0636, found 369.0640.

### 3-(2-oxopropyl)-2H-chromen-2-one (7a). Salicylaldehyde **1a** (24.4 mg, 0.2 mmol), $\alpha$ -

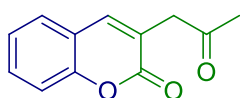

Angelica lactone **3a** (27  $\mu\text{L}$ , 0.3 mmol) were taken in 1 ml of dry 1,4-dioxane. To this, sodium *tert*-butoxide (19.2 mg, 0.2 mmol) was added under nitrogen gas atmosphere. The reaction was run for 2 h. The

reaction was quenched by adding water (5 ml) and the product was extracted with ethyl

acetate (10 ml x 3). The crude mixture was purified by column chromatography on silica gel (eluent: ethylacetate/hexane = 3/7, v/v) afforded solid product **7a** (32 mg, 80% yield). <sup>1</sup>H-NMR (300 MHz, CDCl<sub>3</sub>)  $\delta$  7.55 (s, 1H), 7.46-7.34 (m, 2H), 7.29-7.18 (m, 2H), 3.62 (s, 2H), 2.25 (s, 3H).

**Scale up MCR for the synthesis of compound 4a:** Salicylaldehyde **1a** (5.0 mmol) and malononitrile **2** (5.0 mmol) were taken in 25 ml of dry 1,4-Dioxane, to this  $\gamma$ -butenolide **3a** (7.5 mmol) and then sodium *tert*-butoxide (5.0 mmol) were added under nitrogen gas atmosphere. The resulting reaction mixture was stirred at room temperature and the progress of reaction was monitored by TLC. The reaction was quenched by adding water (25 ml) and the product was extracted with ethyl acetate. The combined organic layer was dried over Na<sub>2</sub>SO<sub>4</sub>, filtered and concentrated under reduce pressure to give sticky solid which was purified by column chromatography on silica gel (eluent: ethylacetate/DCM = 1/3, v/v). The ratio of diastereomers was determined by <sup>1</sup>H NMR of crude reaction mixture and found to be 7.3:1. The crude mixture was purified by column chromatography on silica gel (eluent: ethylacetate/DCM = 1/3, v/v) afforded inseparable mixture of diastereomers as solid (0.8 g, 60% yield).

### 3. Single Crystal X-ray Structures

Thermal ellipsoids are drawn at the 50% probability level. Molecular structure of compound **4a** crystallized out with solvent (chloroform).

| Sr. No. | ORTEP Diagram                                                                       | Compound Structure                                                                                                             |
|---------|-------------------------------------------------------------------------------------|--------------------------------------------------------------------------------------------------------------------------------|
| 1.      | 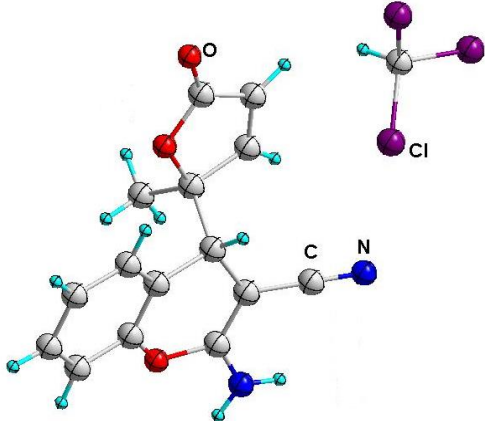   | 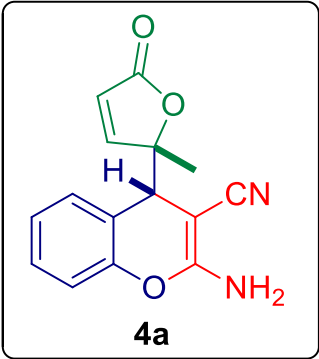 <p><b>4a</b></p> <p>CCDC No. 1889050</p>   |
| 2.      | 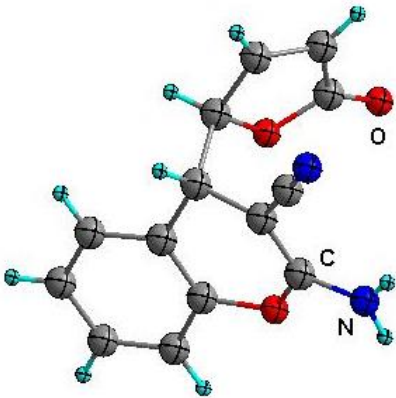 | 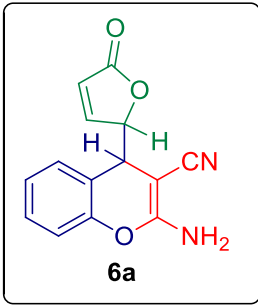 <p><b>6a</b></p> <p>CCDC No. 1889052</p> |
| 3.      | 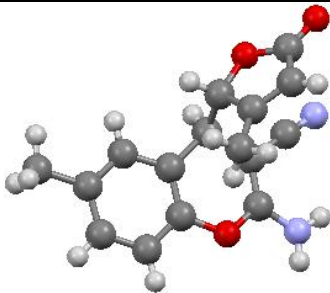 | 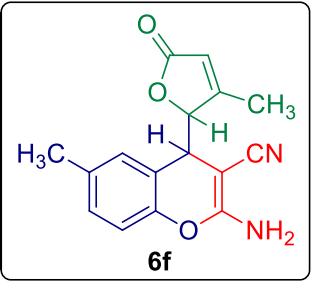 <p><b>6f</b></p> <p>CCDC No. 1889053</p> |

#### 4. References

1. (a) B. C. Raju, A. K. Tiwari, J. A. Kumar, A. Z. Ali, S. B. Agawane, G. Saidachary and K. Madhusudana, *Bioorg. Med. Chem.* 2010, 18, 358.
- 2 R. P. Singh, B. M. Foxman and L. Deng, *J. Am. Chem. Soc.*, 2010, 132, 9558.
3. Z.-H. Wang, Z.-J. Wu, X.-Q. Huang, D.-F. Yue, Y. You, X.-Y. Xu, X.-M. Zhanga and W.-C. Yuan, *Chem. Commun.*, 2015, 51, 15835.
4. J. Wu, Q. Zhu, L. Wang, R. Fathi and Z. Yang, *J. Org. Chem.*, 2003, 68, 670.

## 5. Copies of $^1\text{H}$ and $^{13}\text{C}$ NMR Spectra

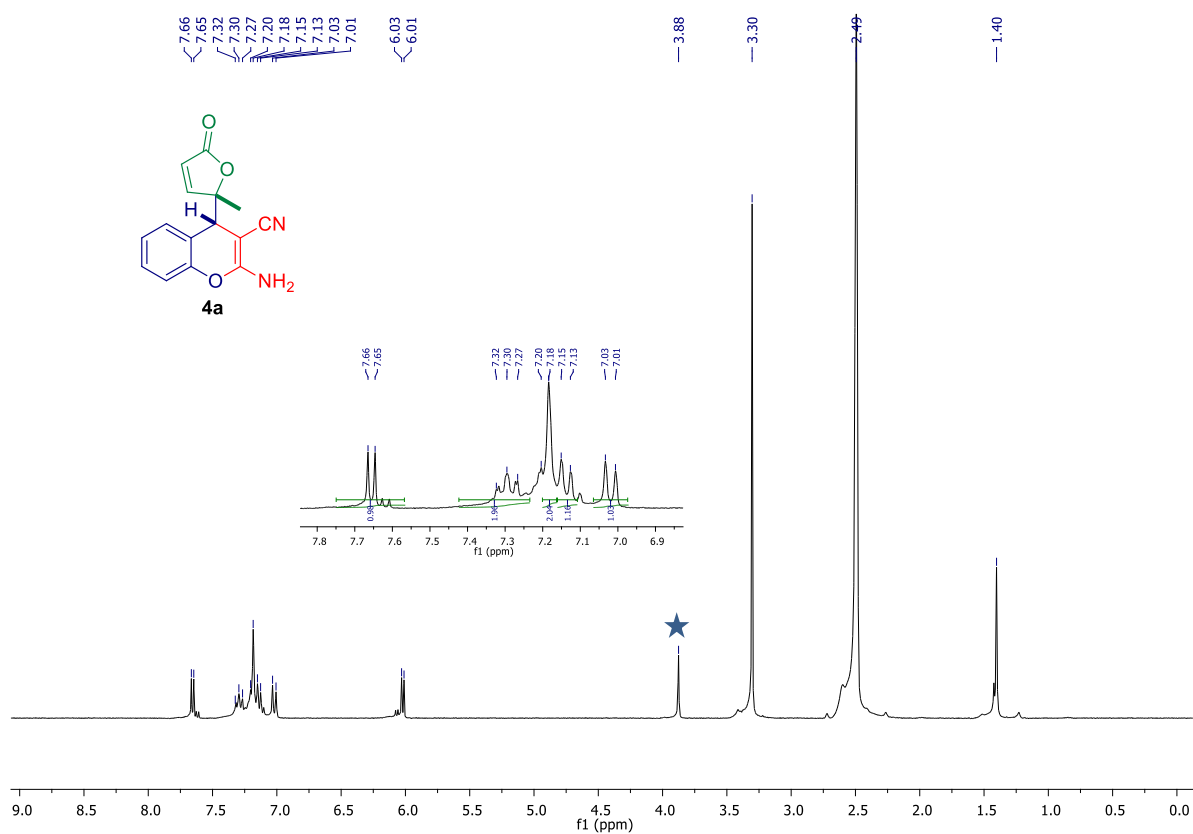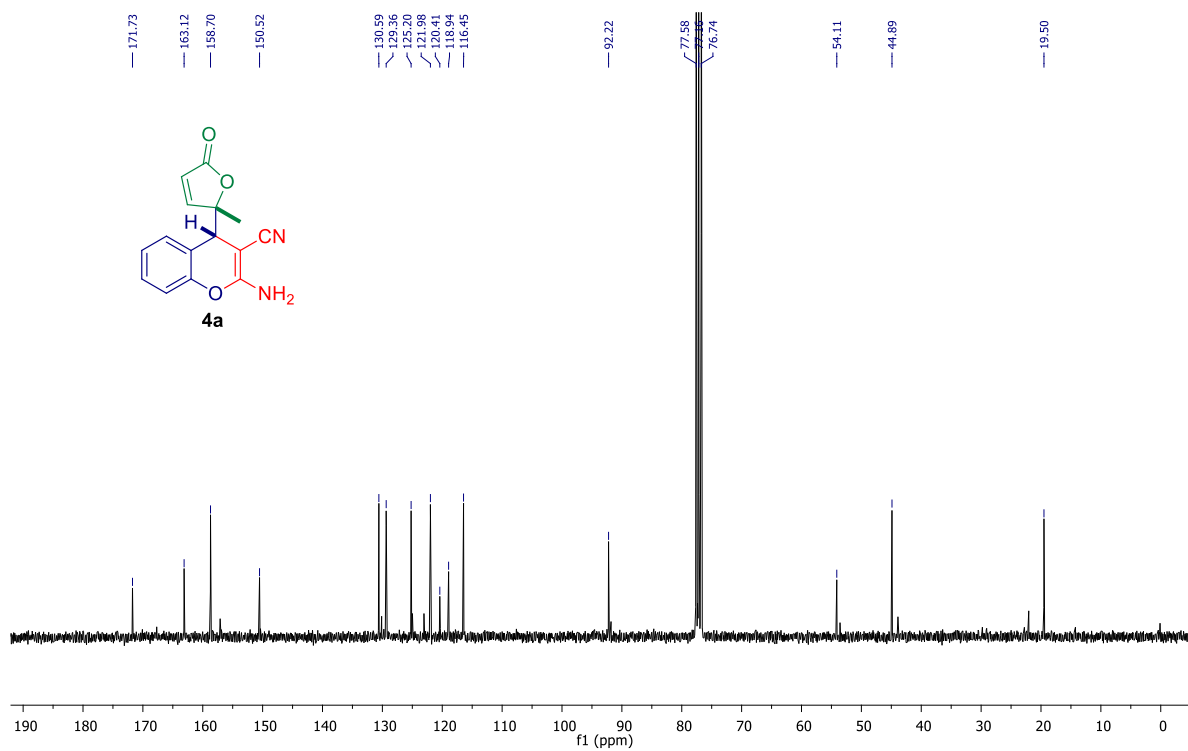

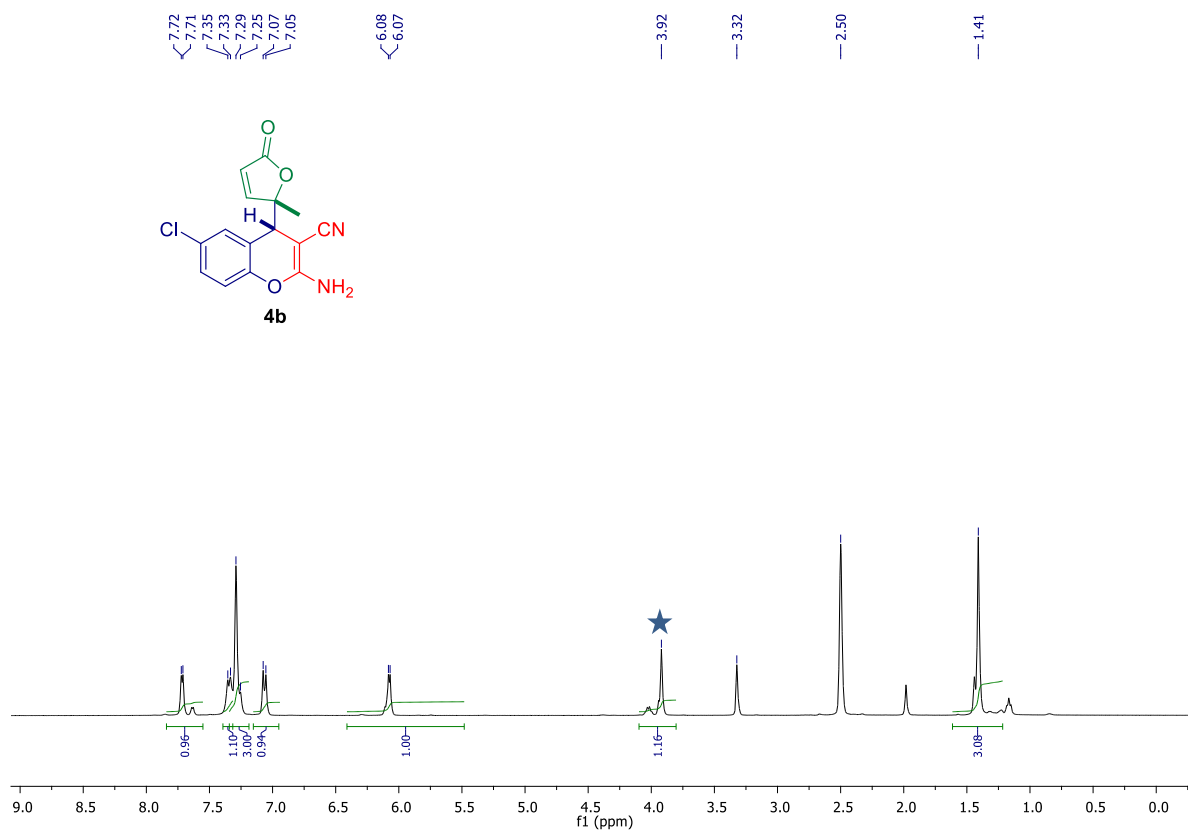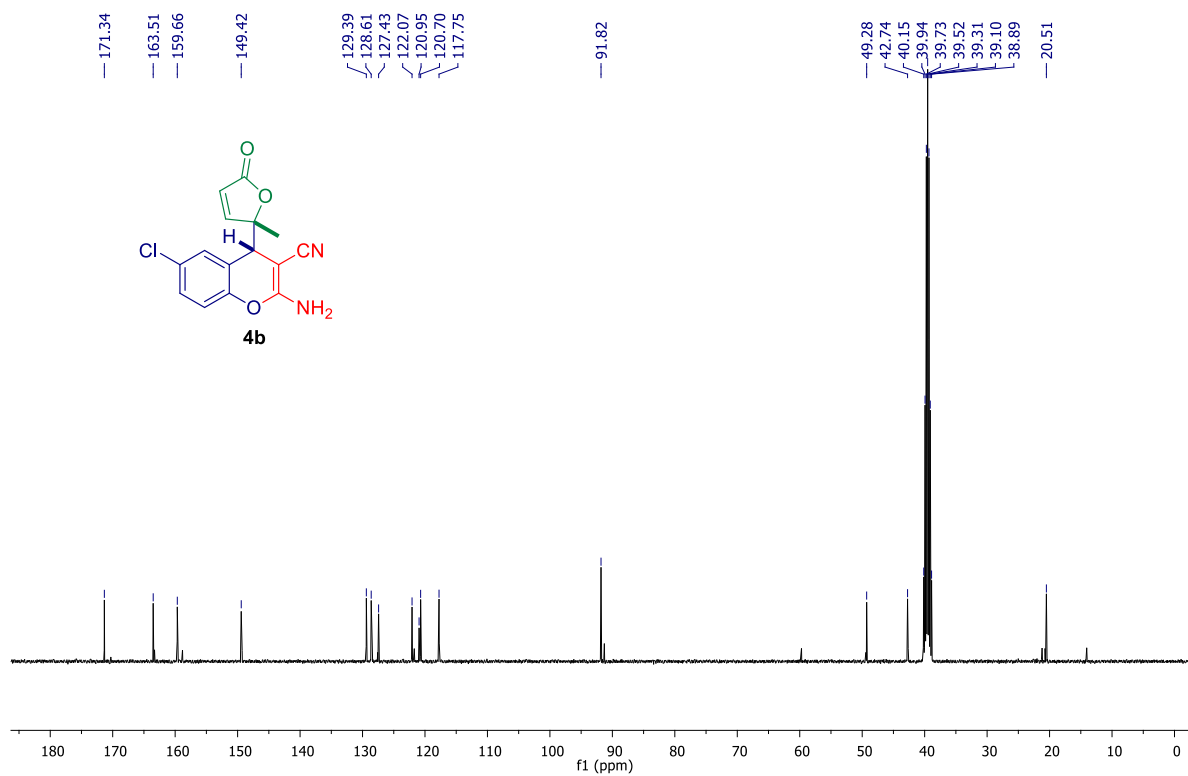

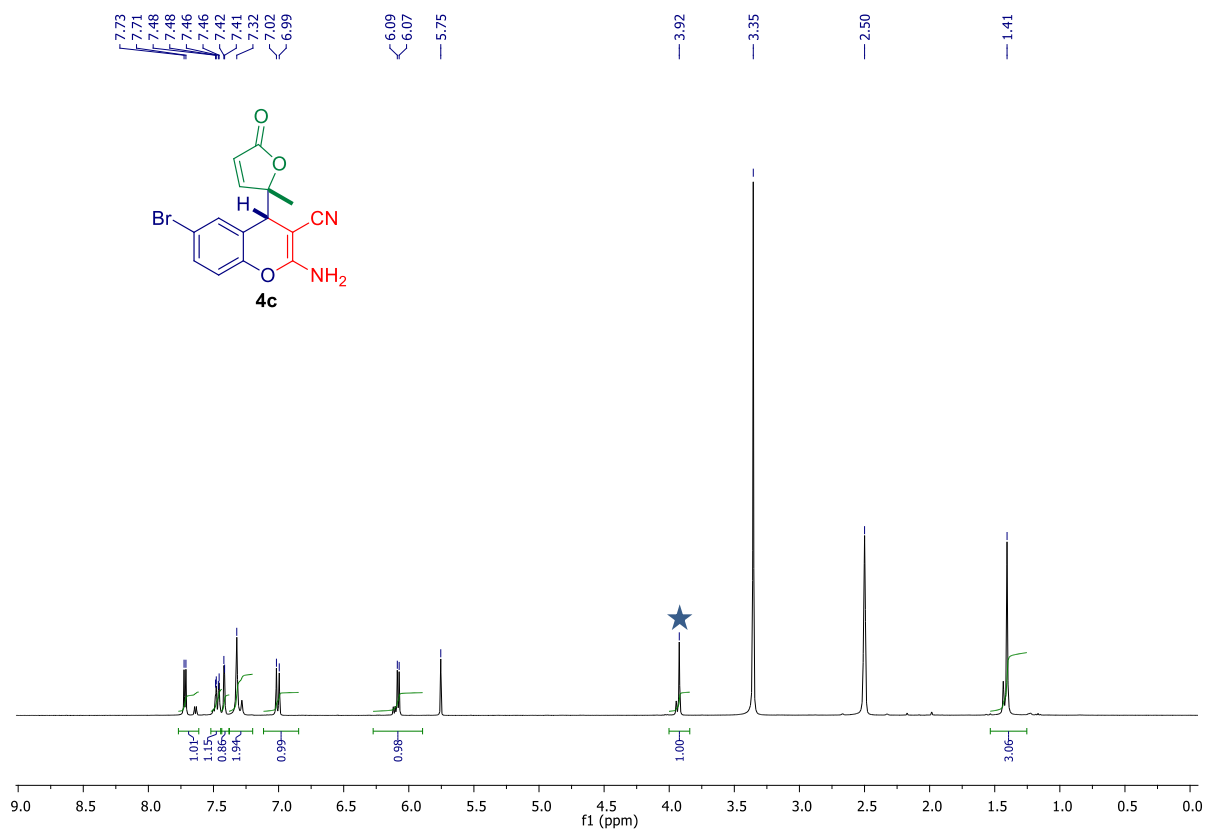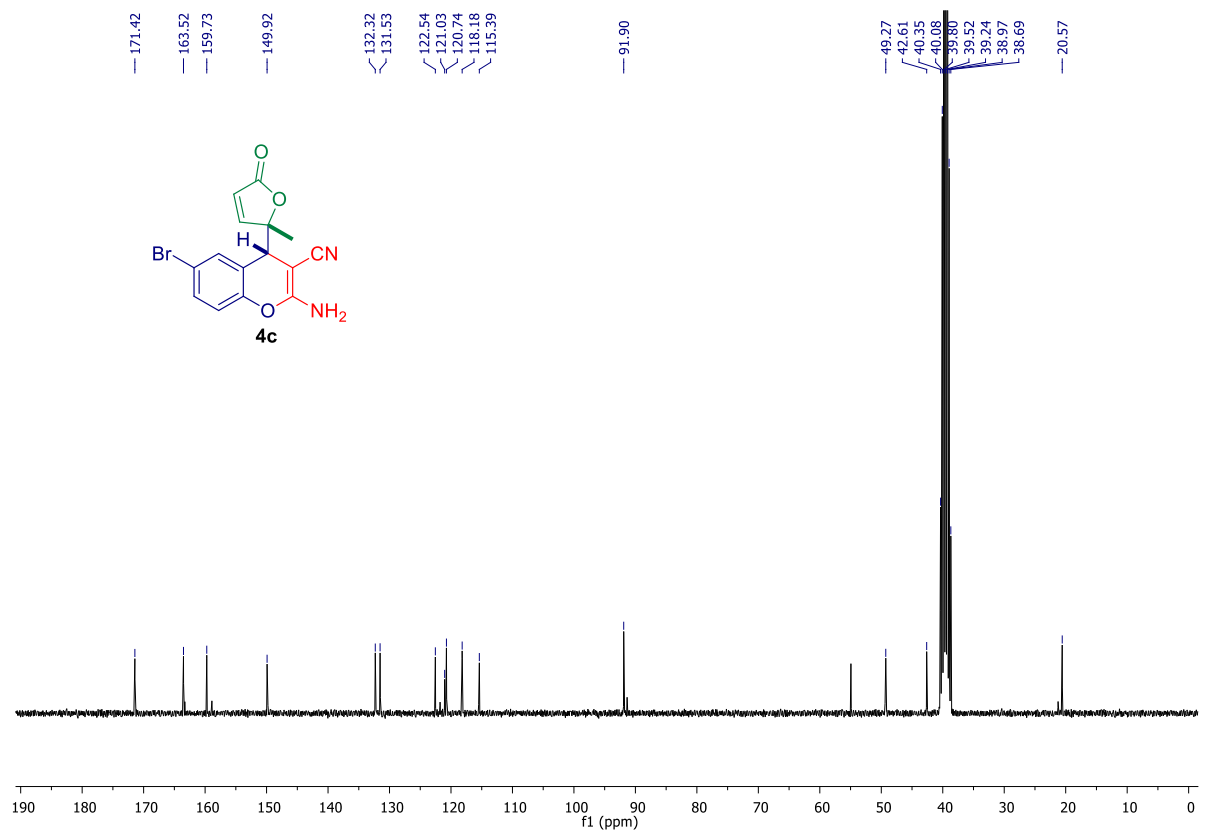

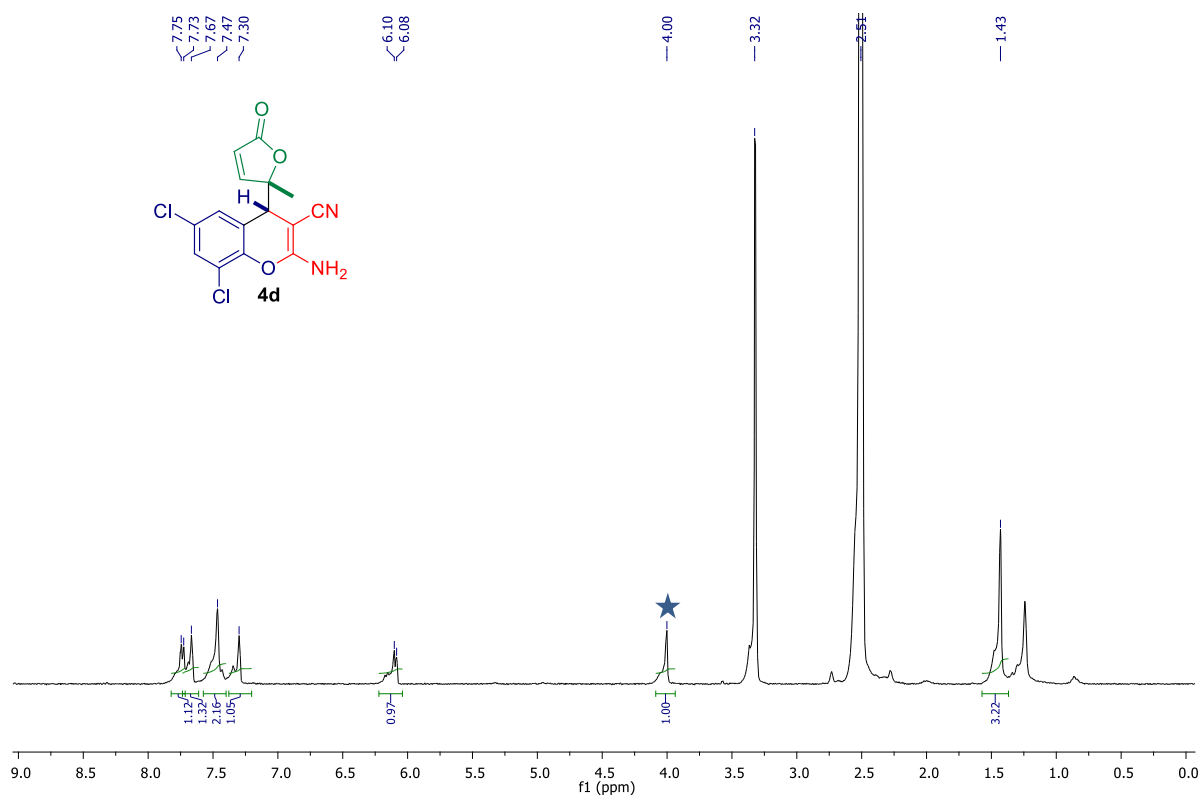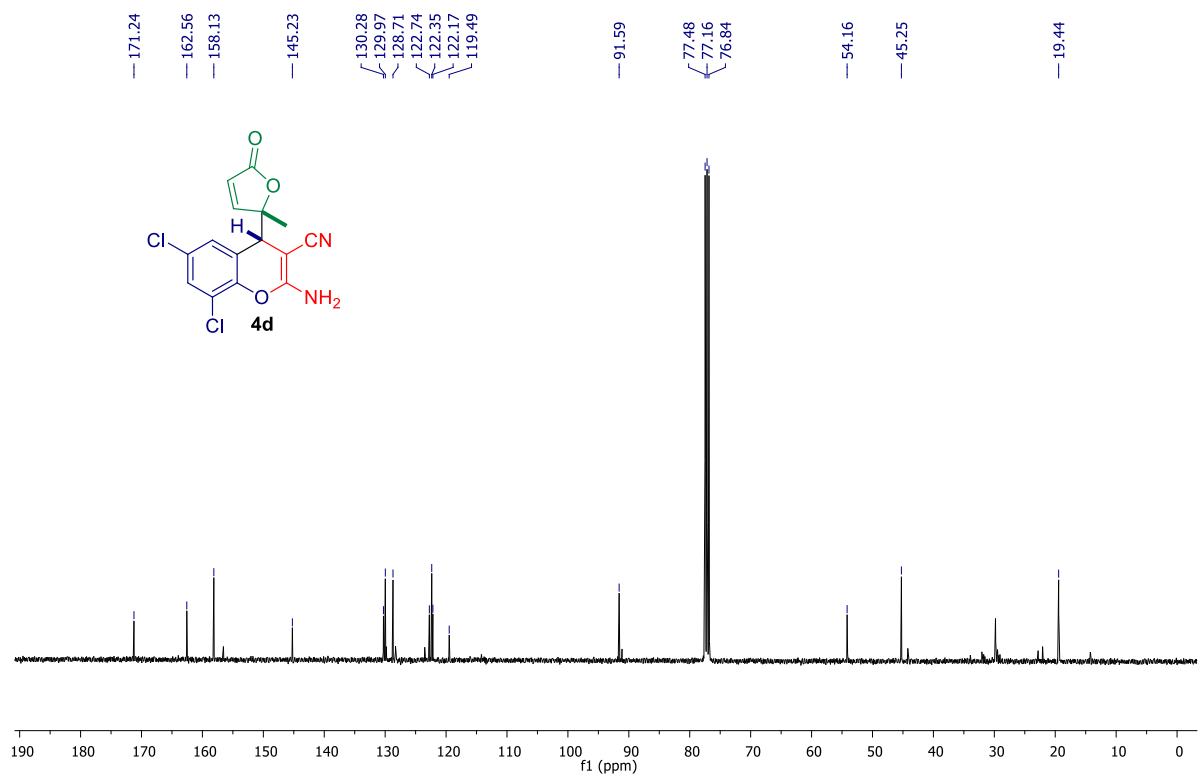

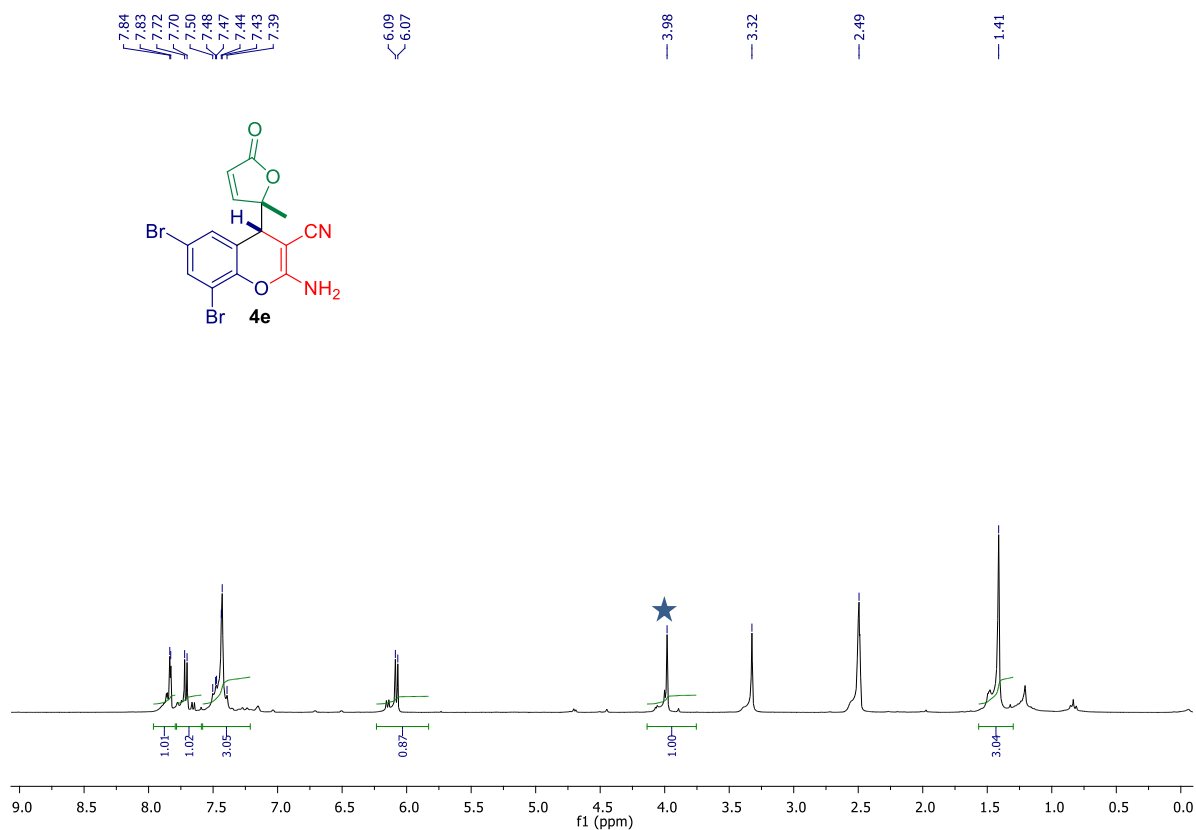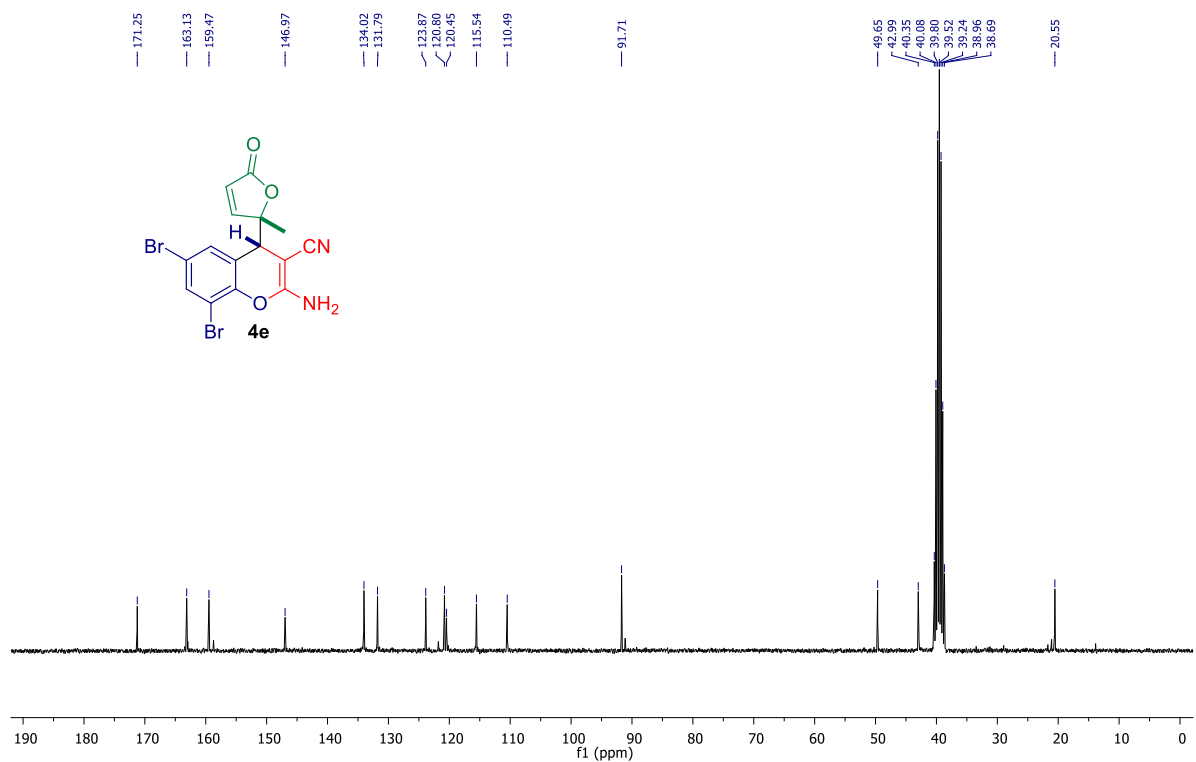

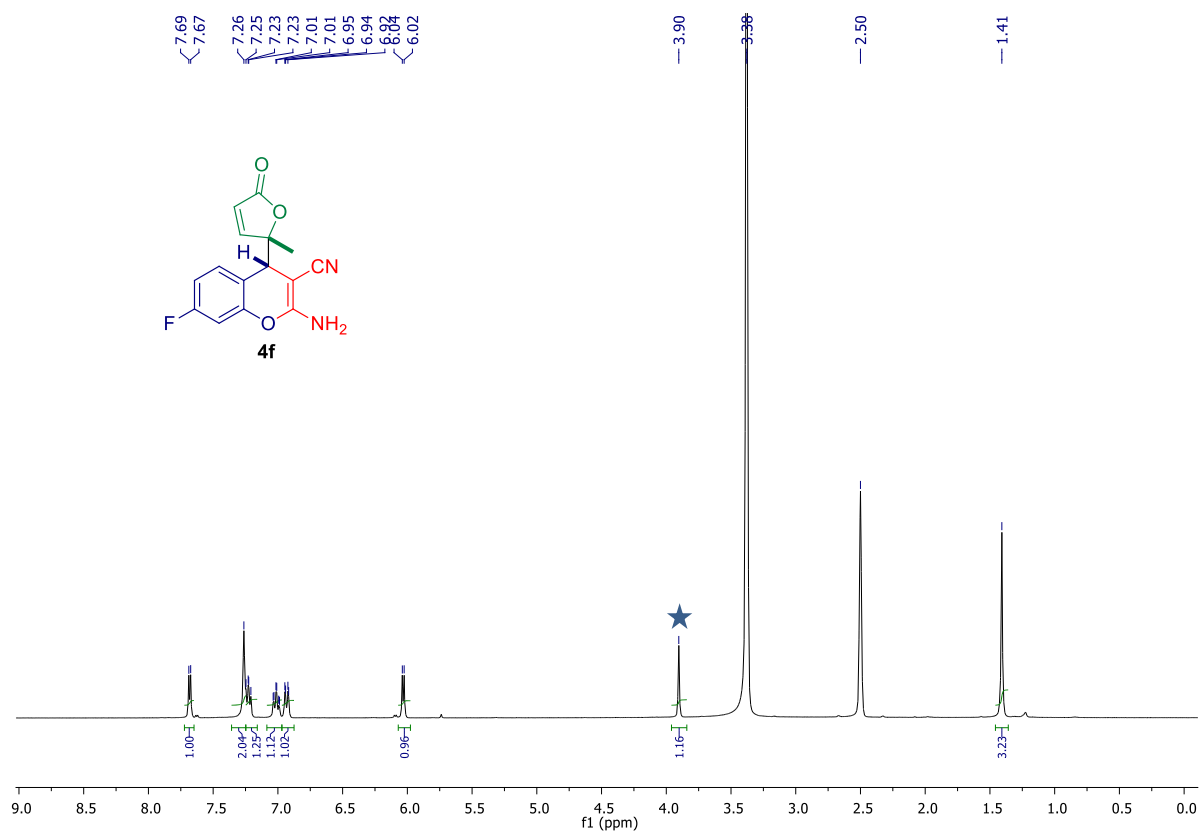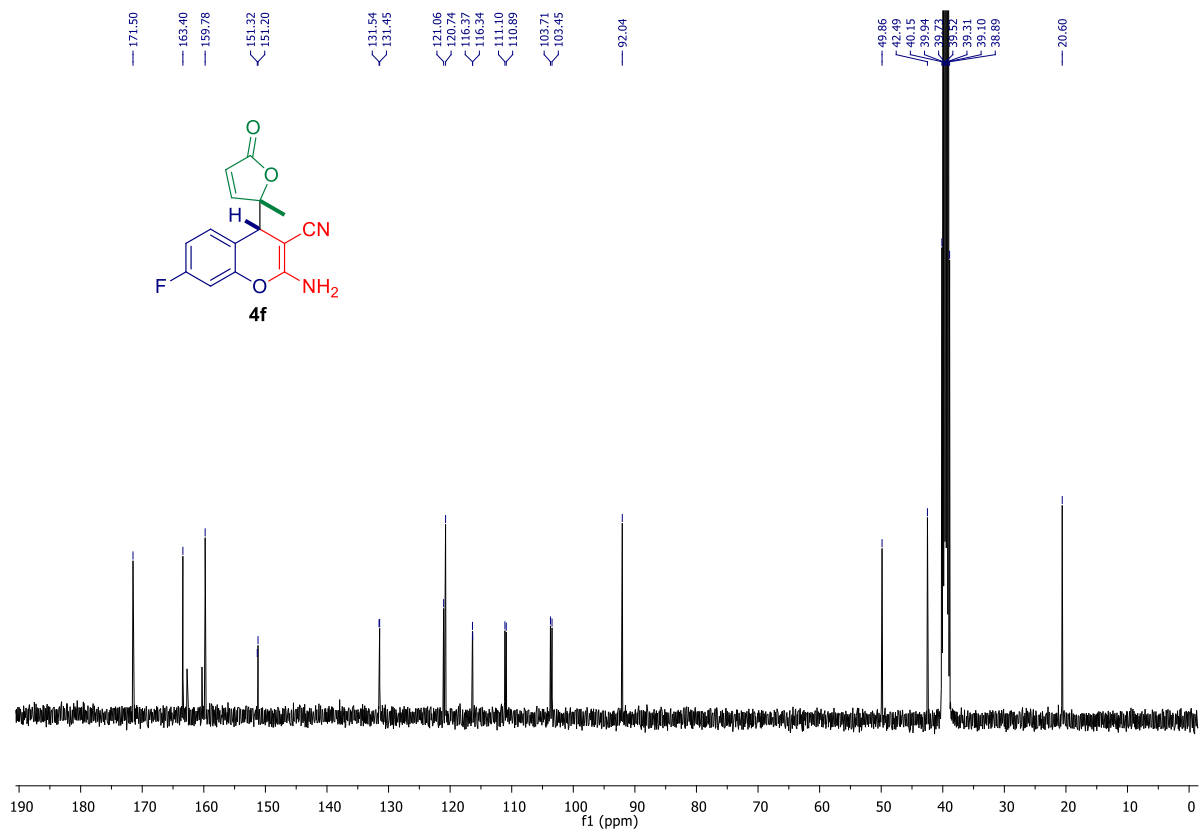

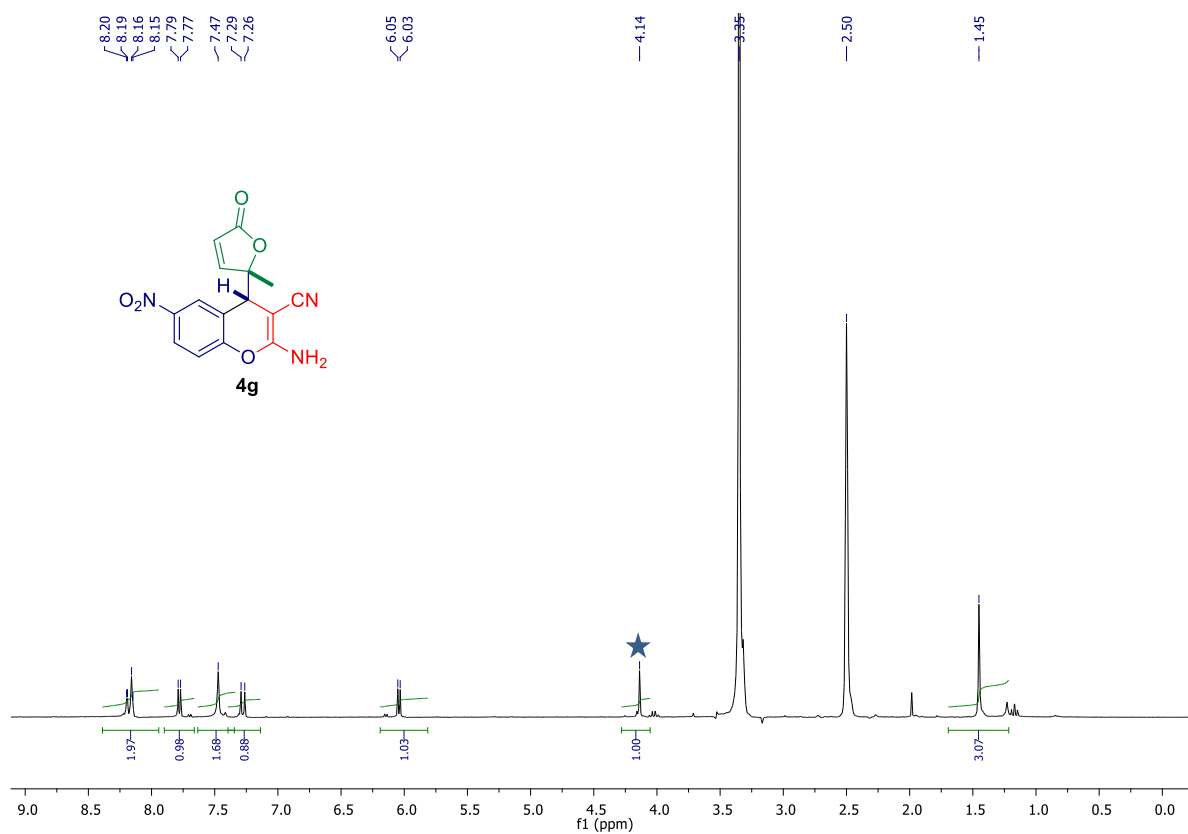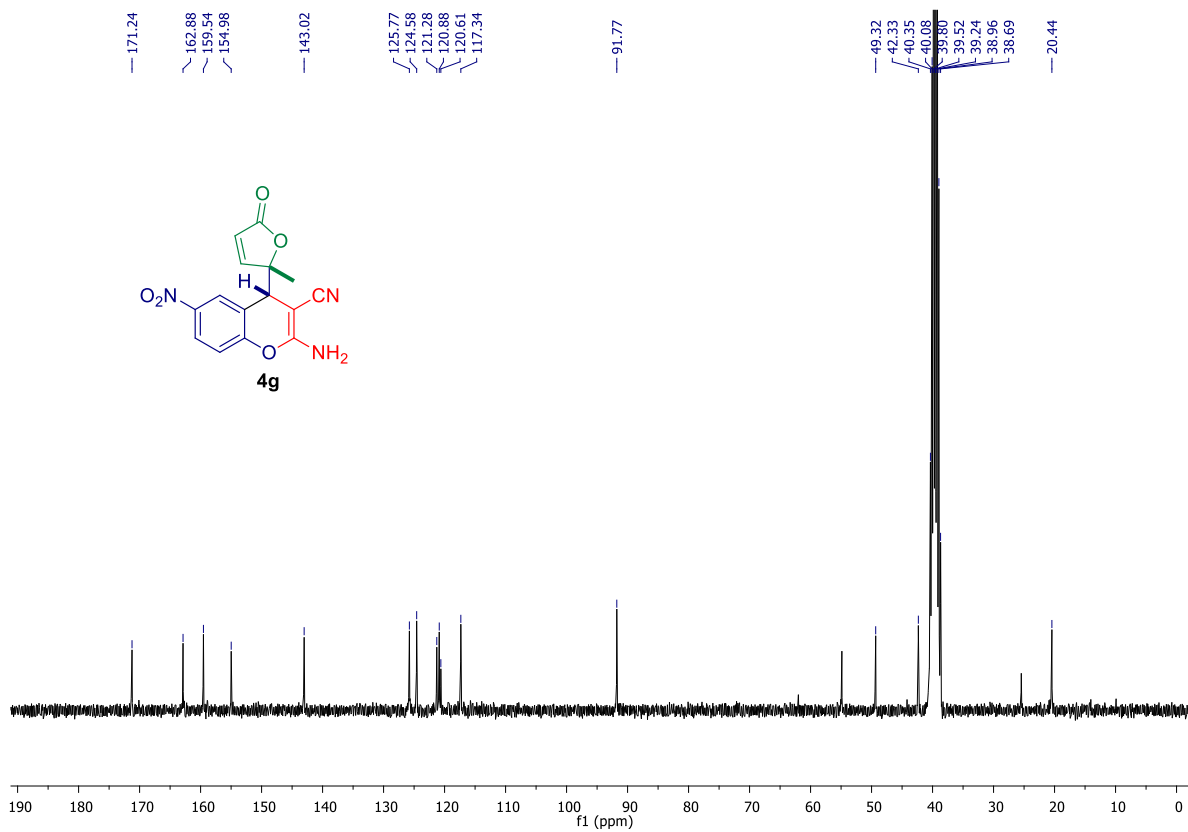

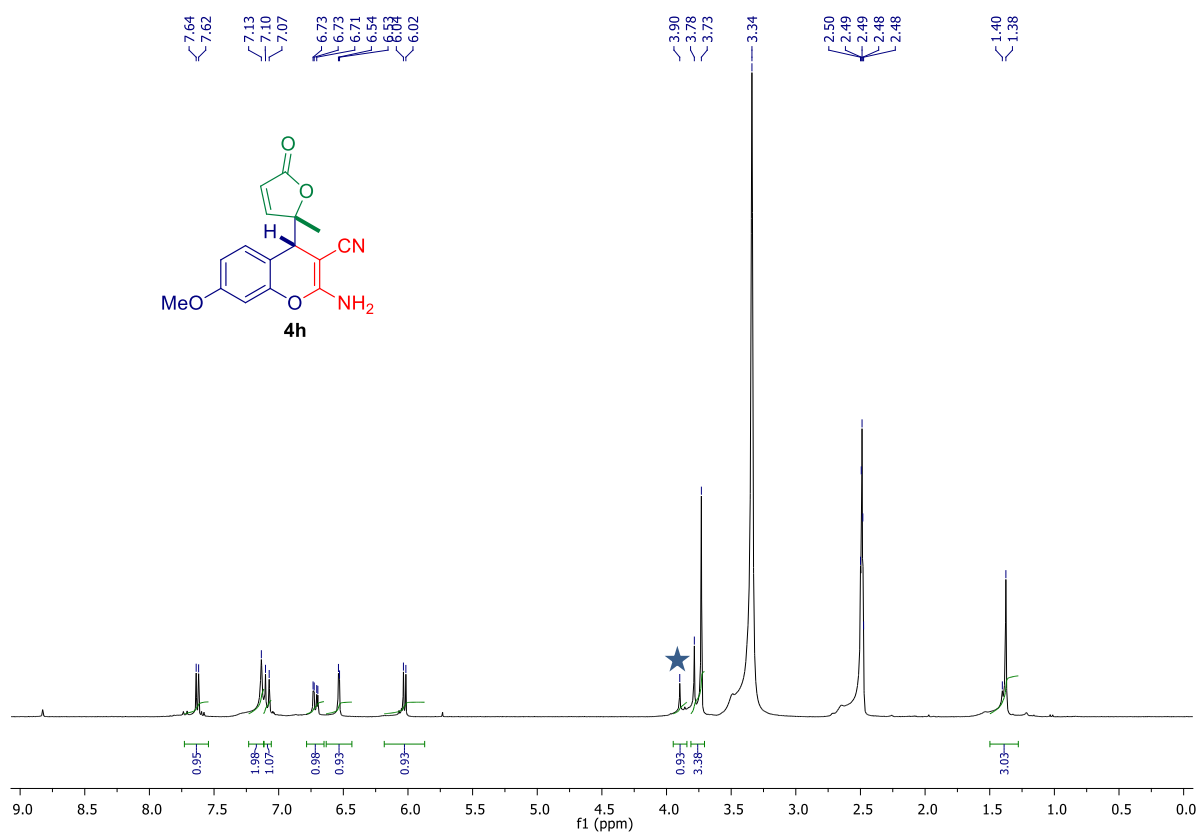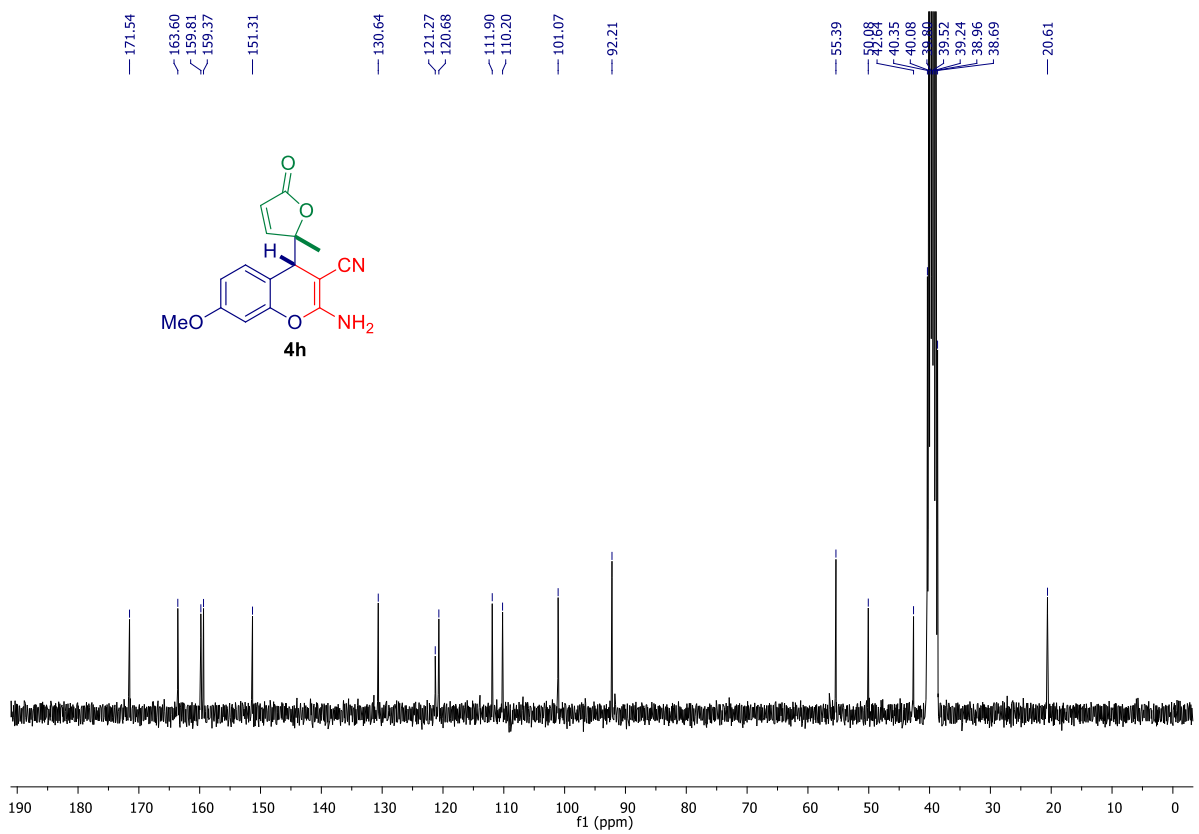

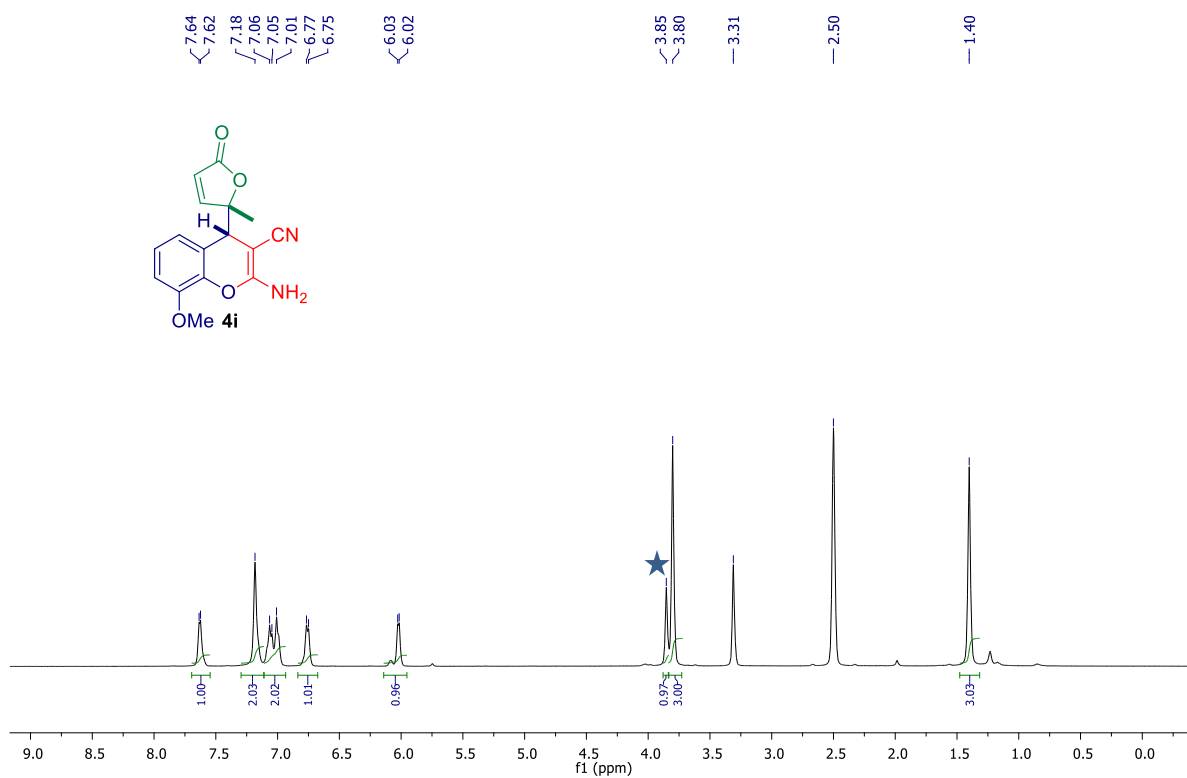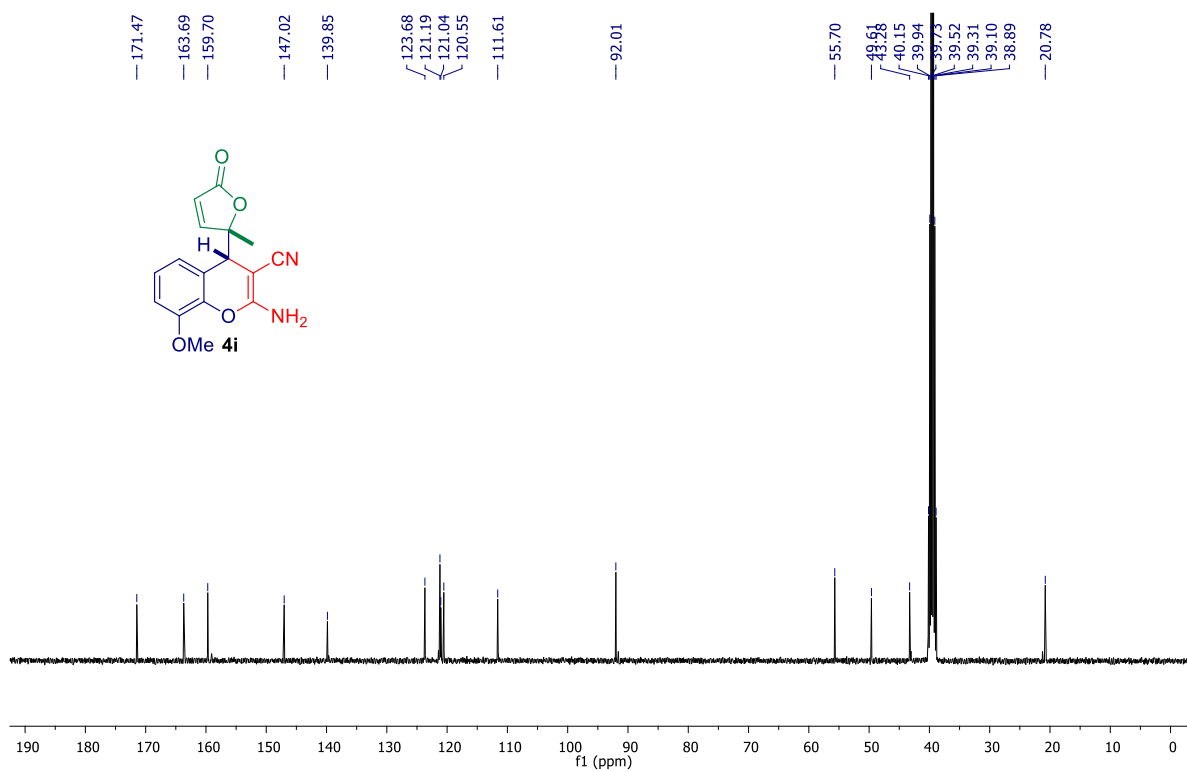

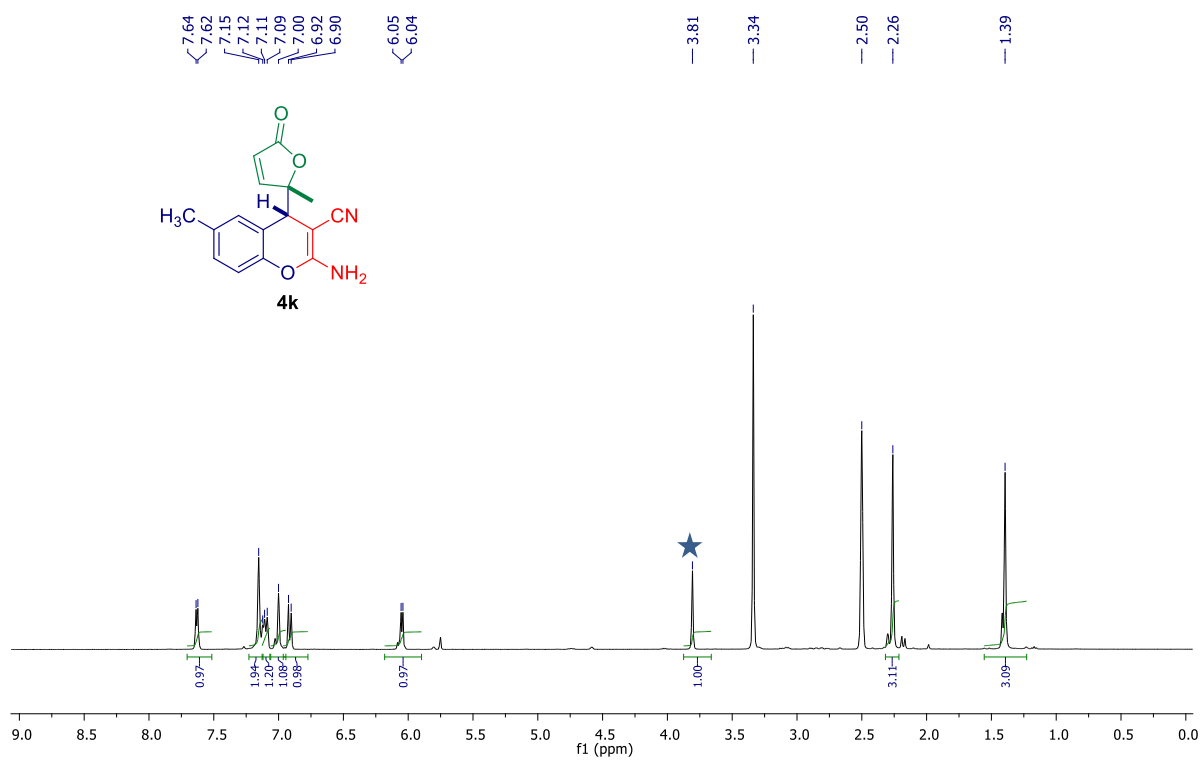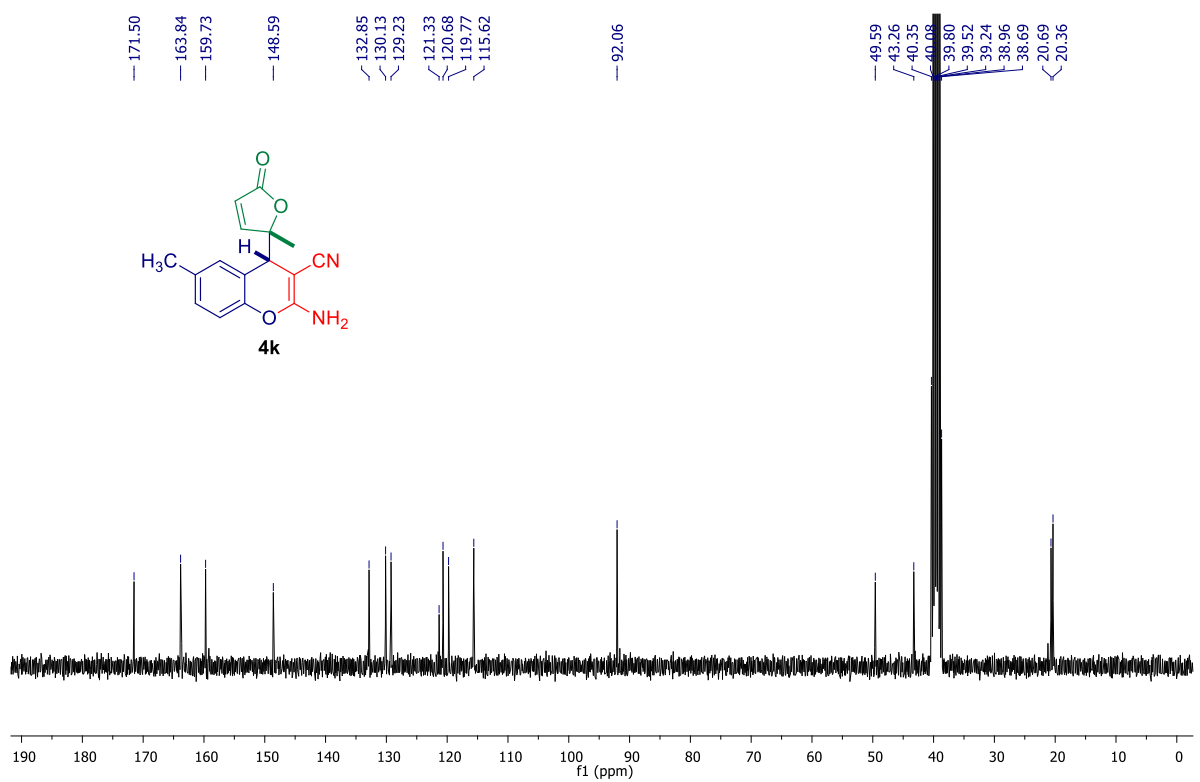

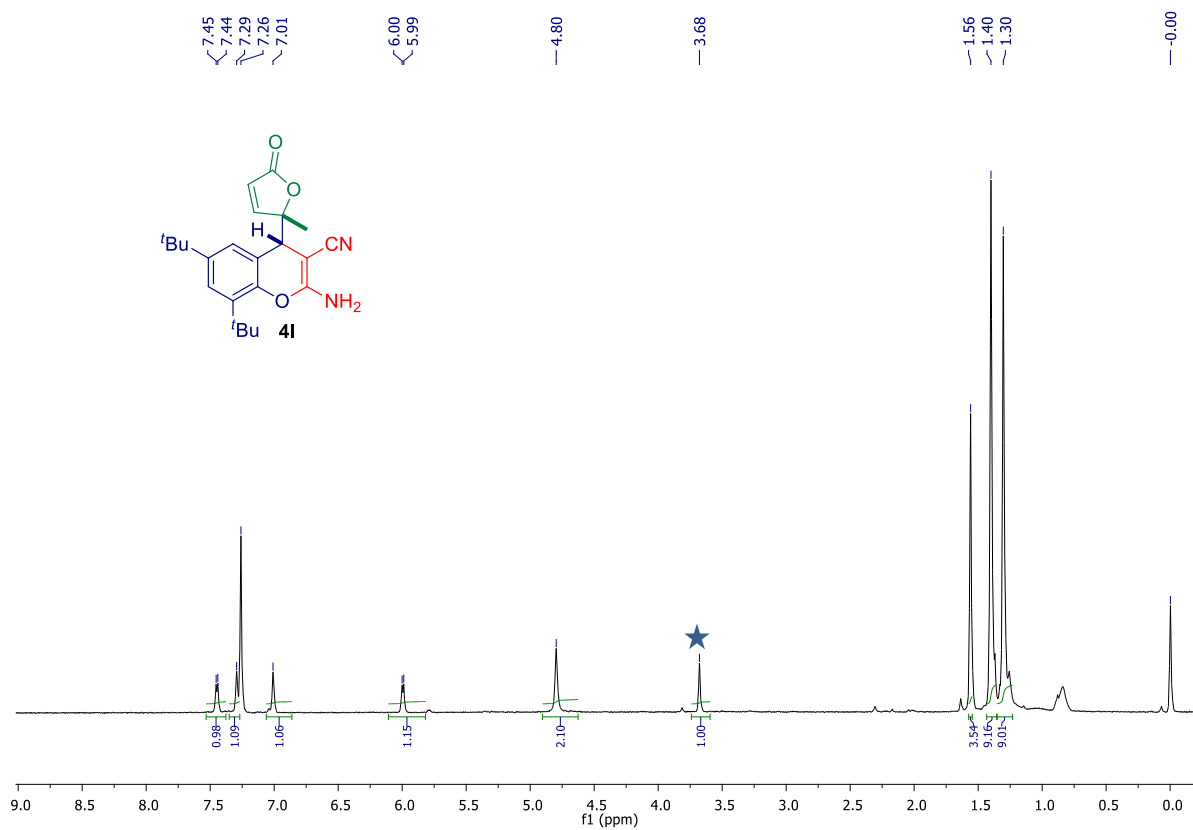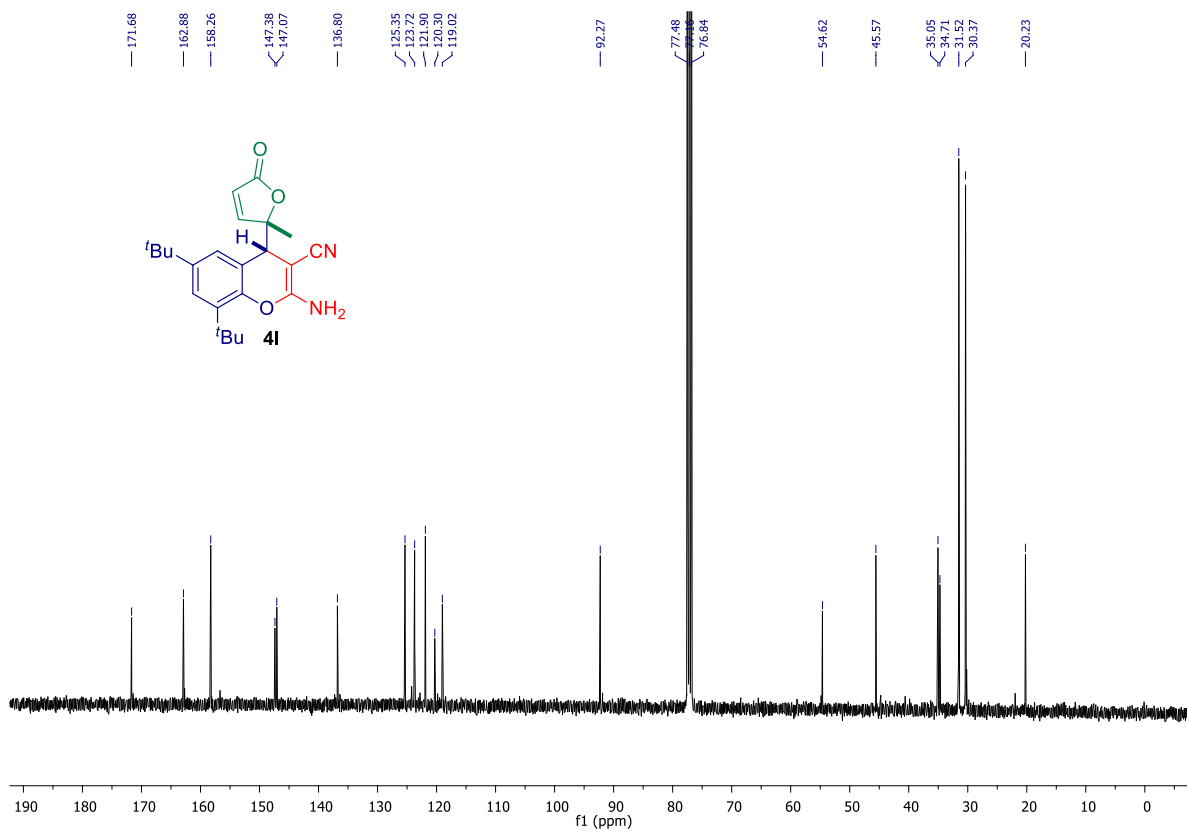

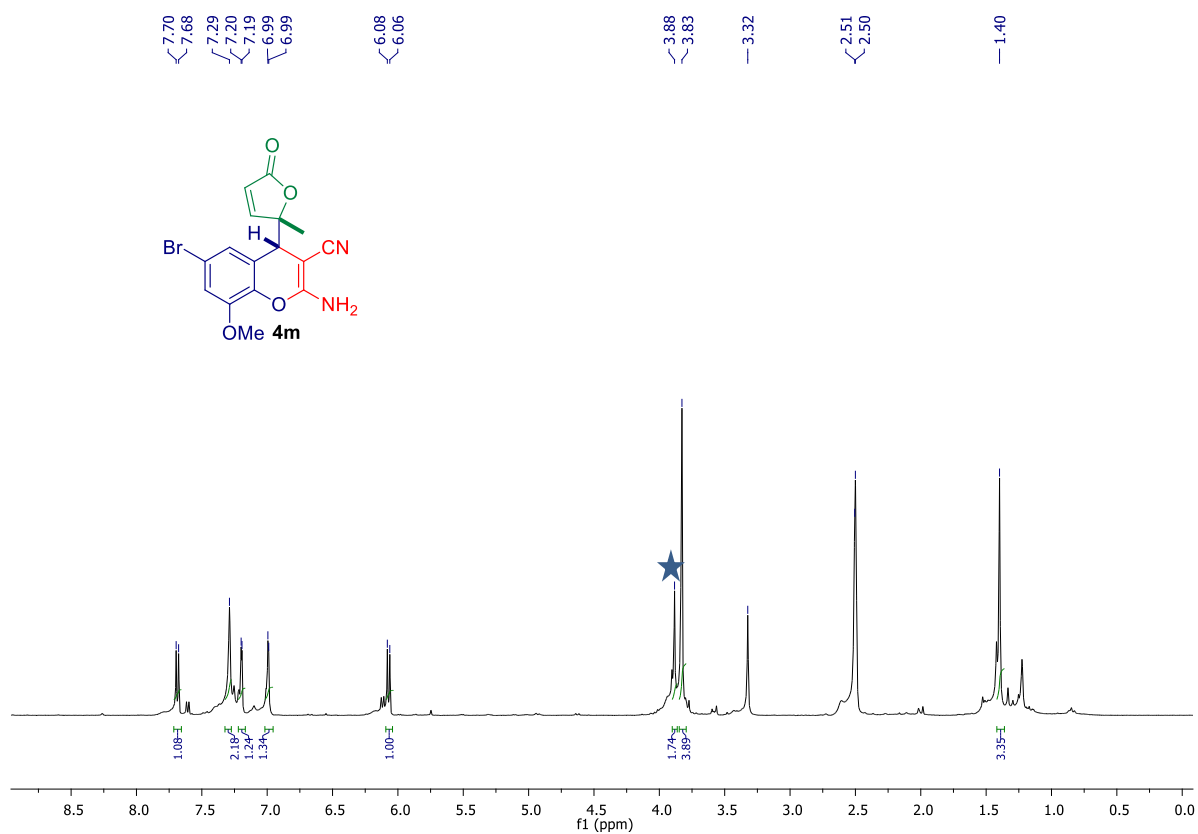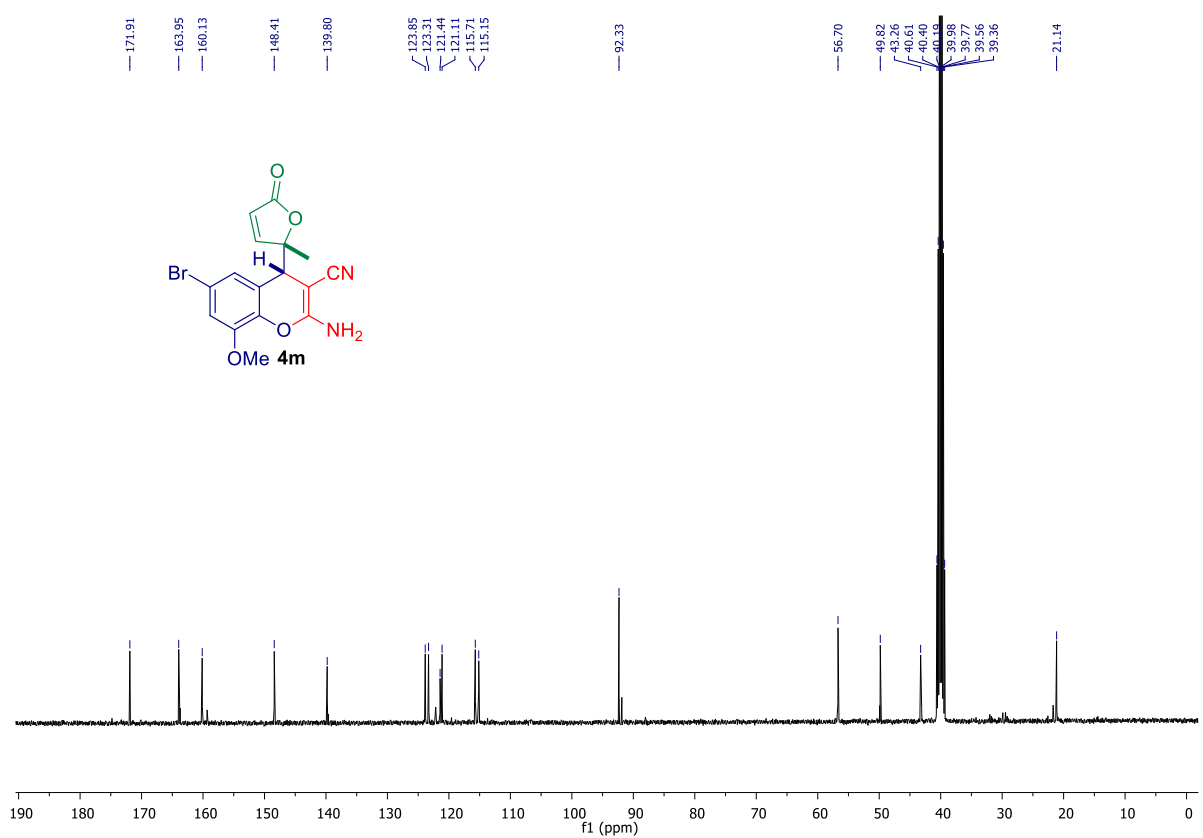

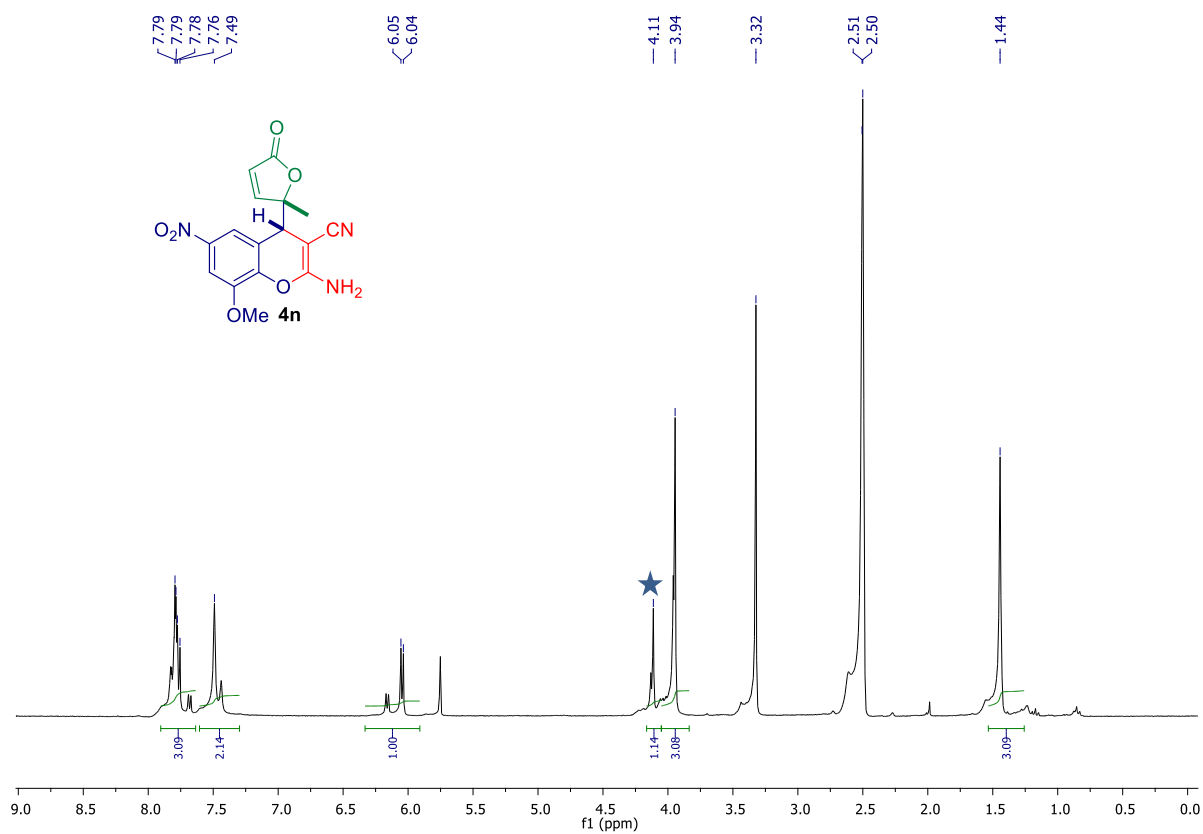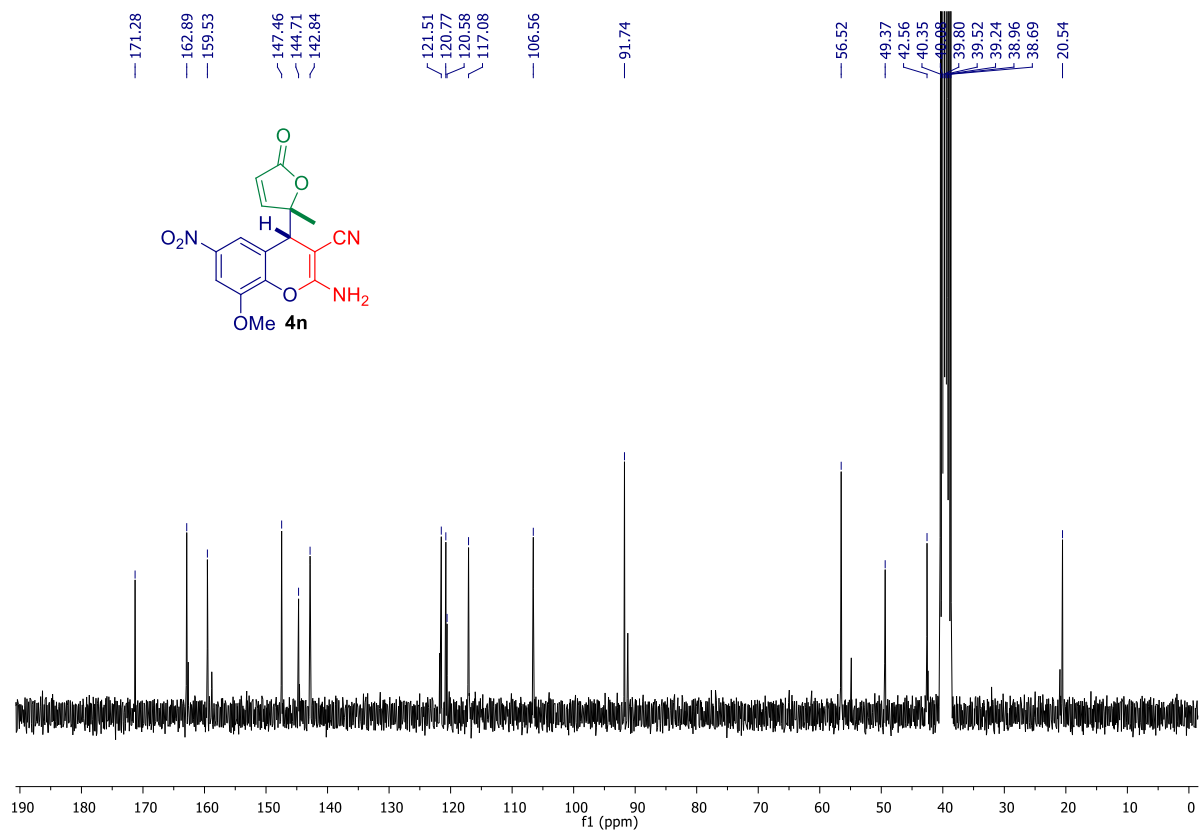

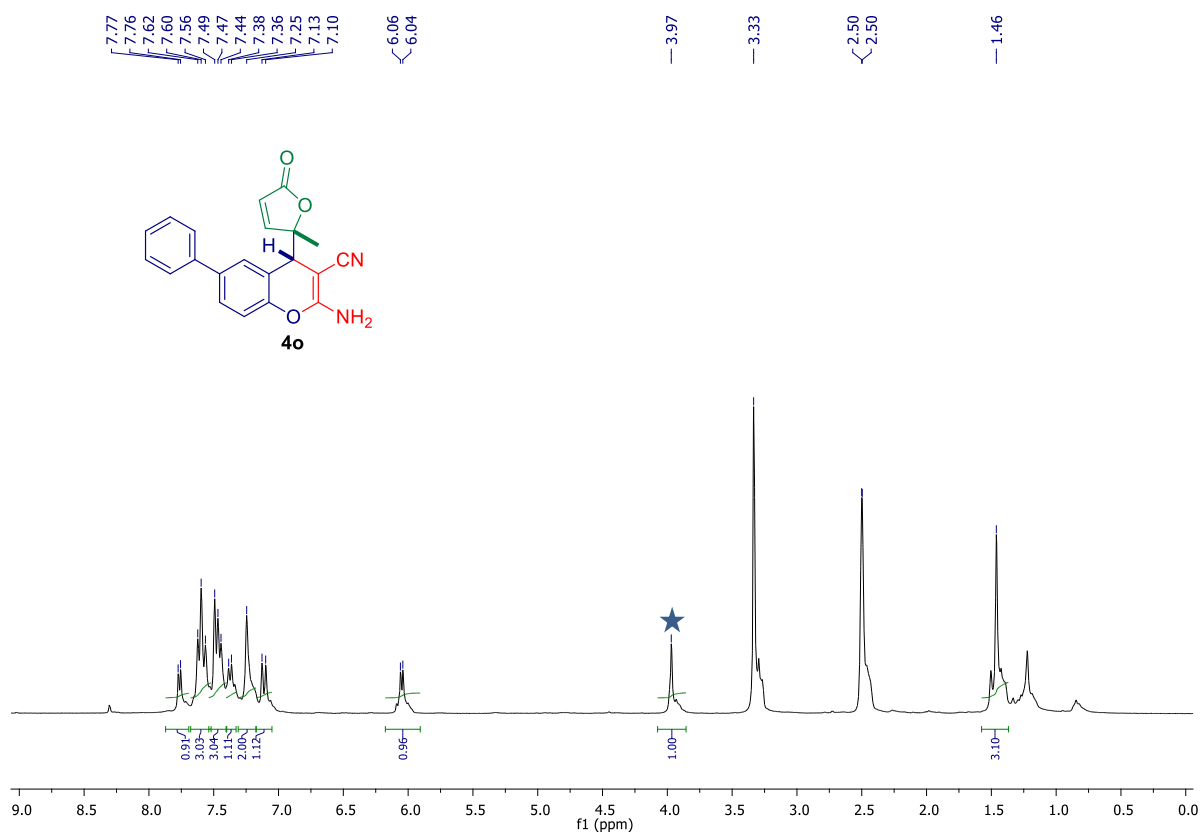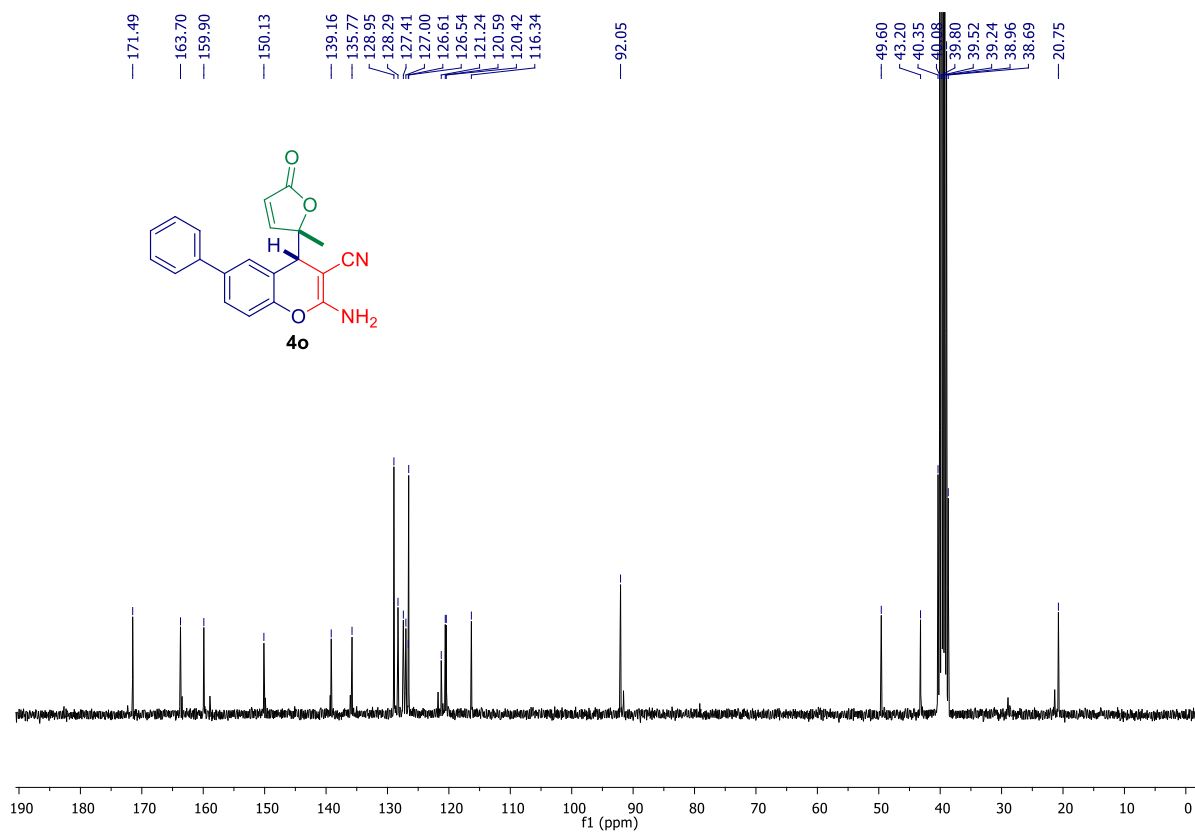

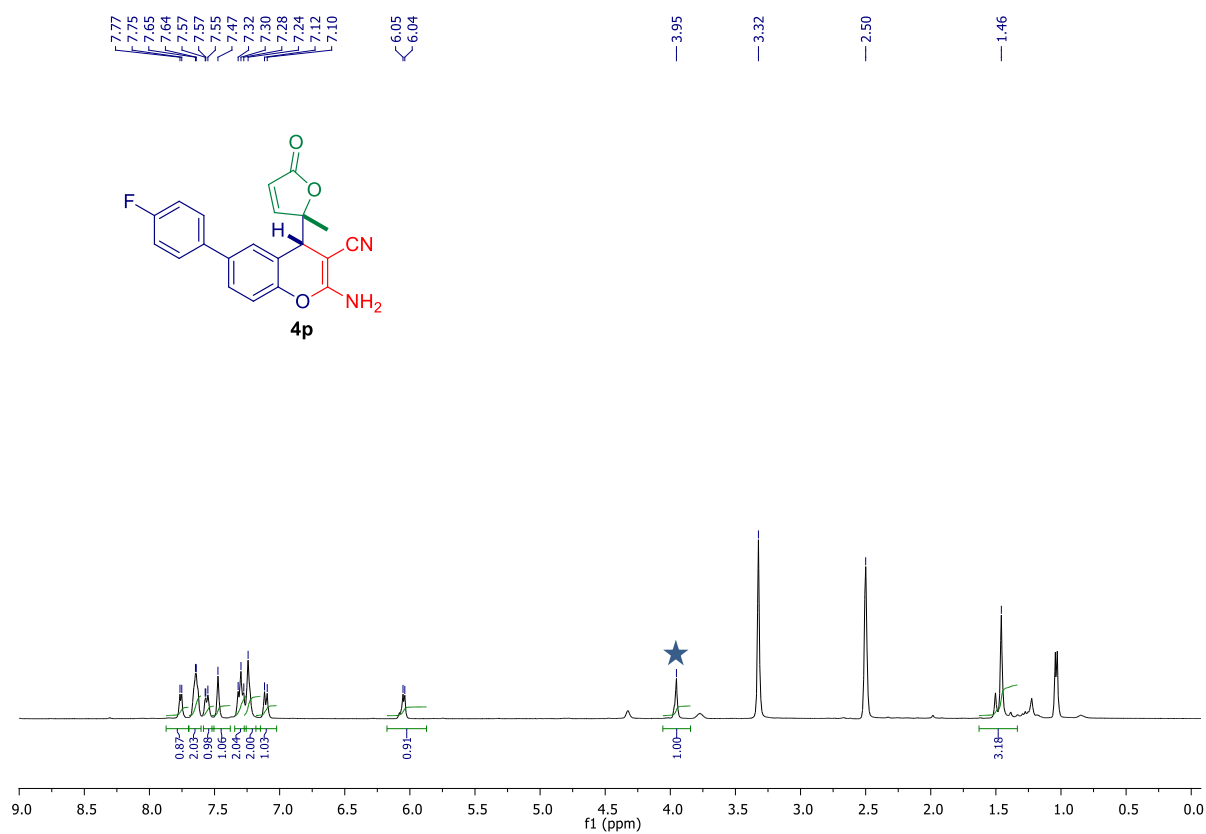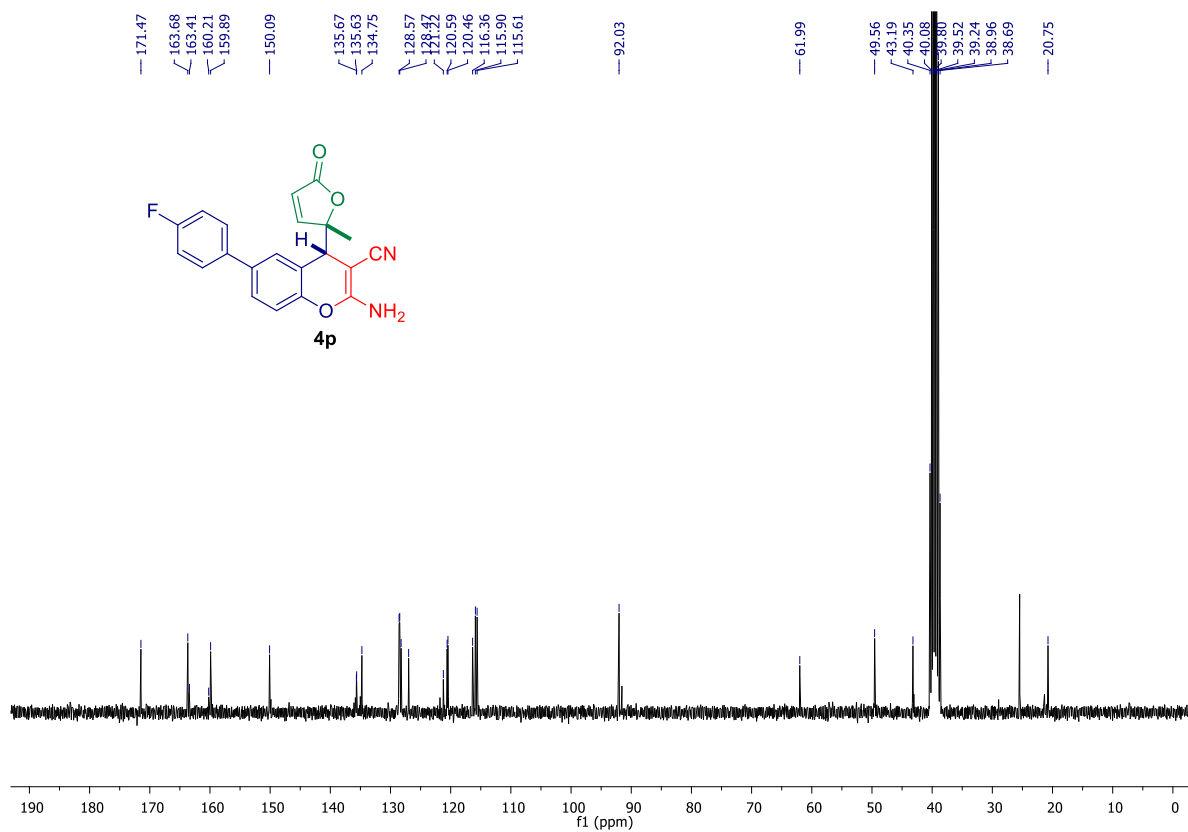

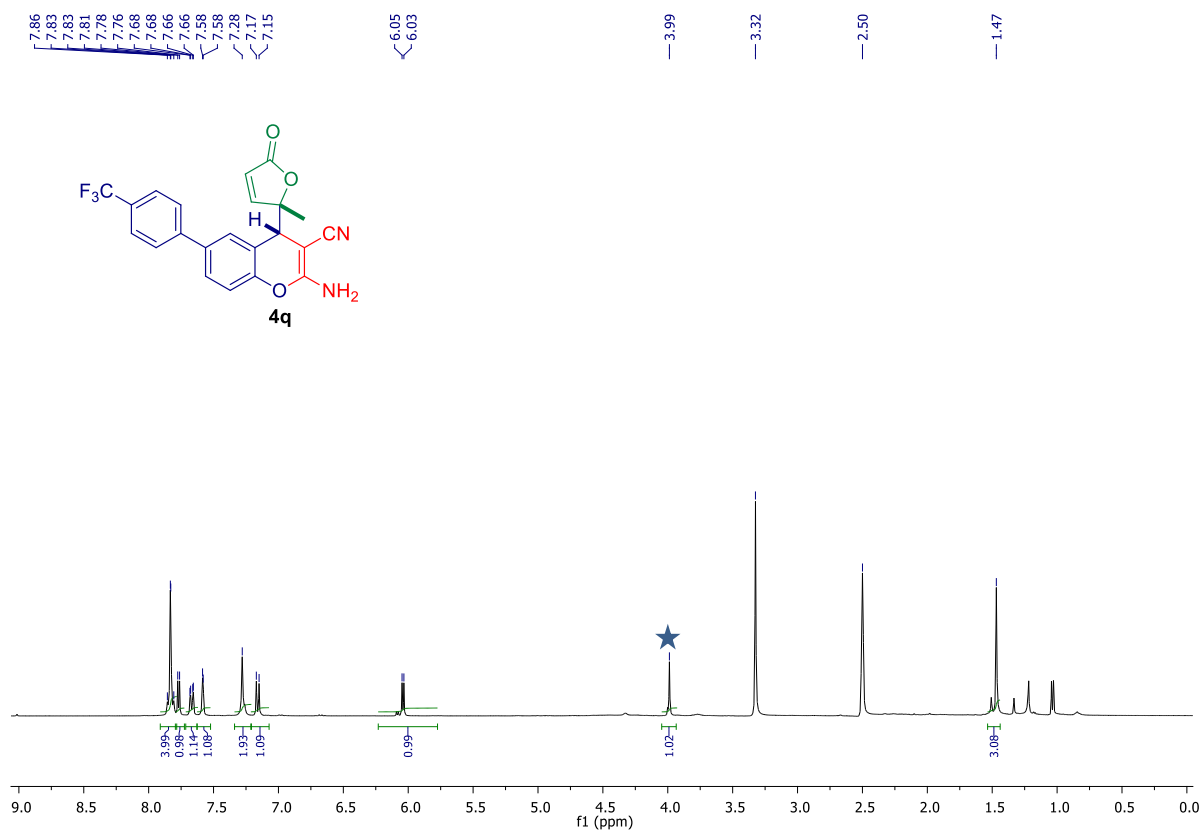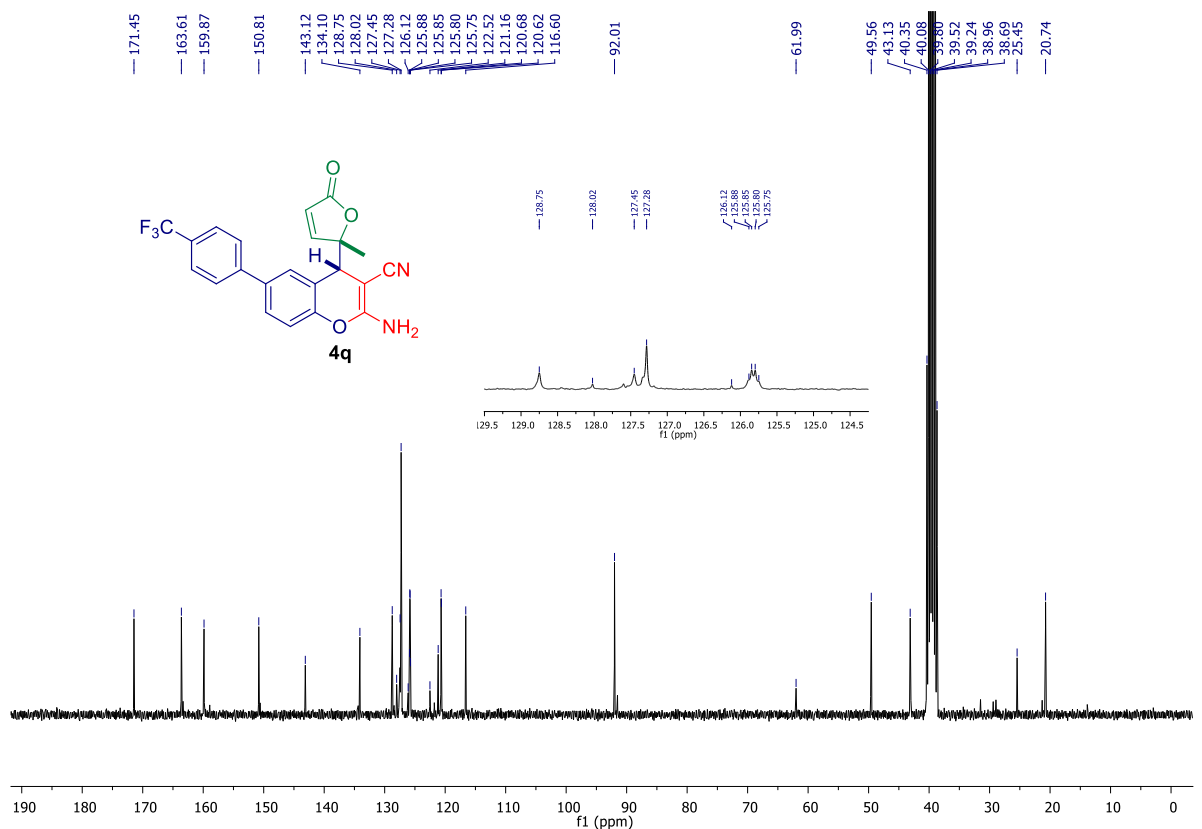

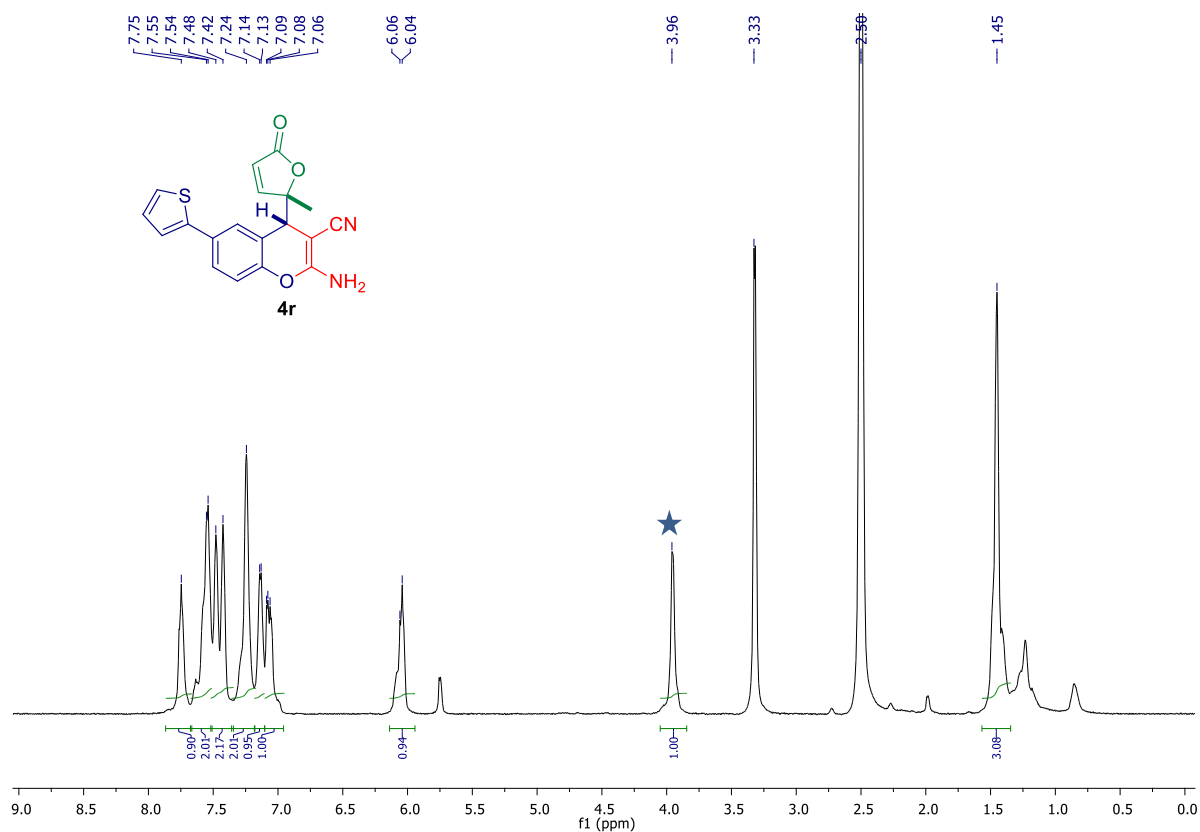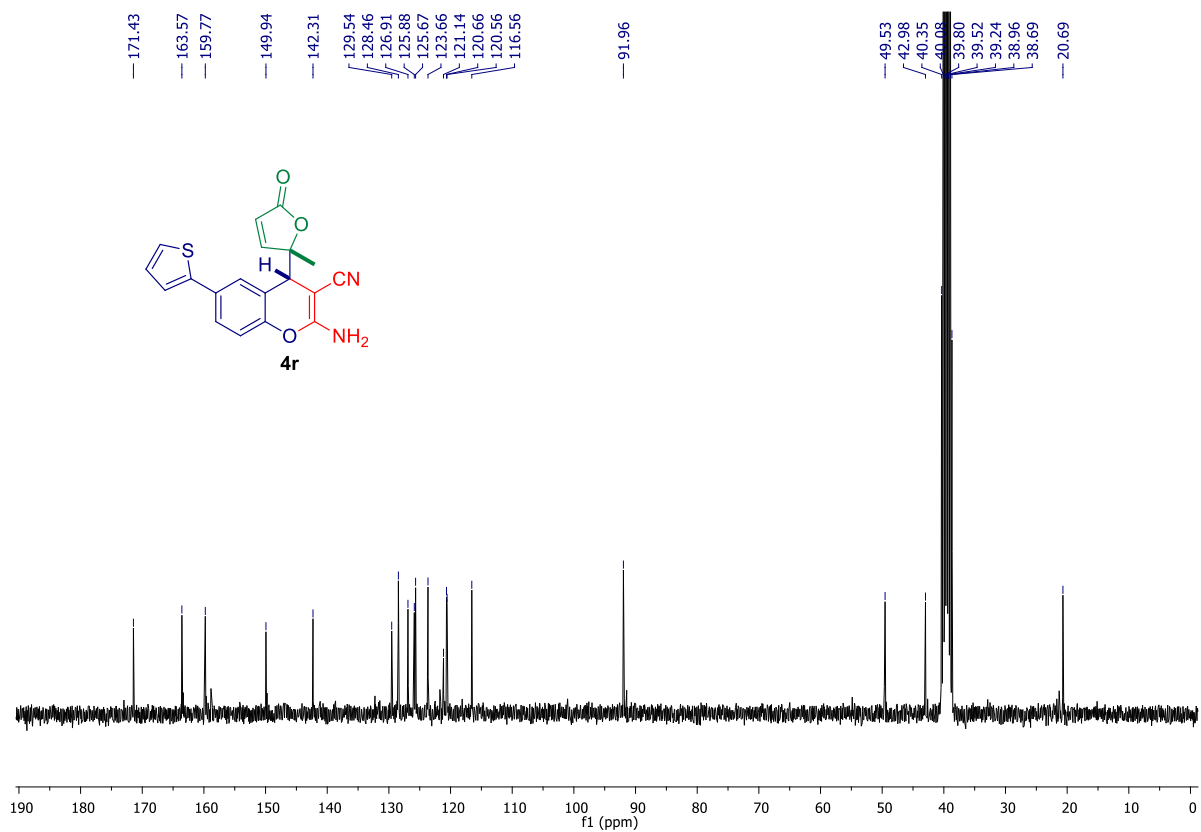

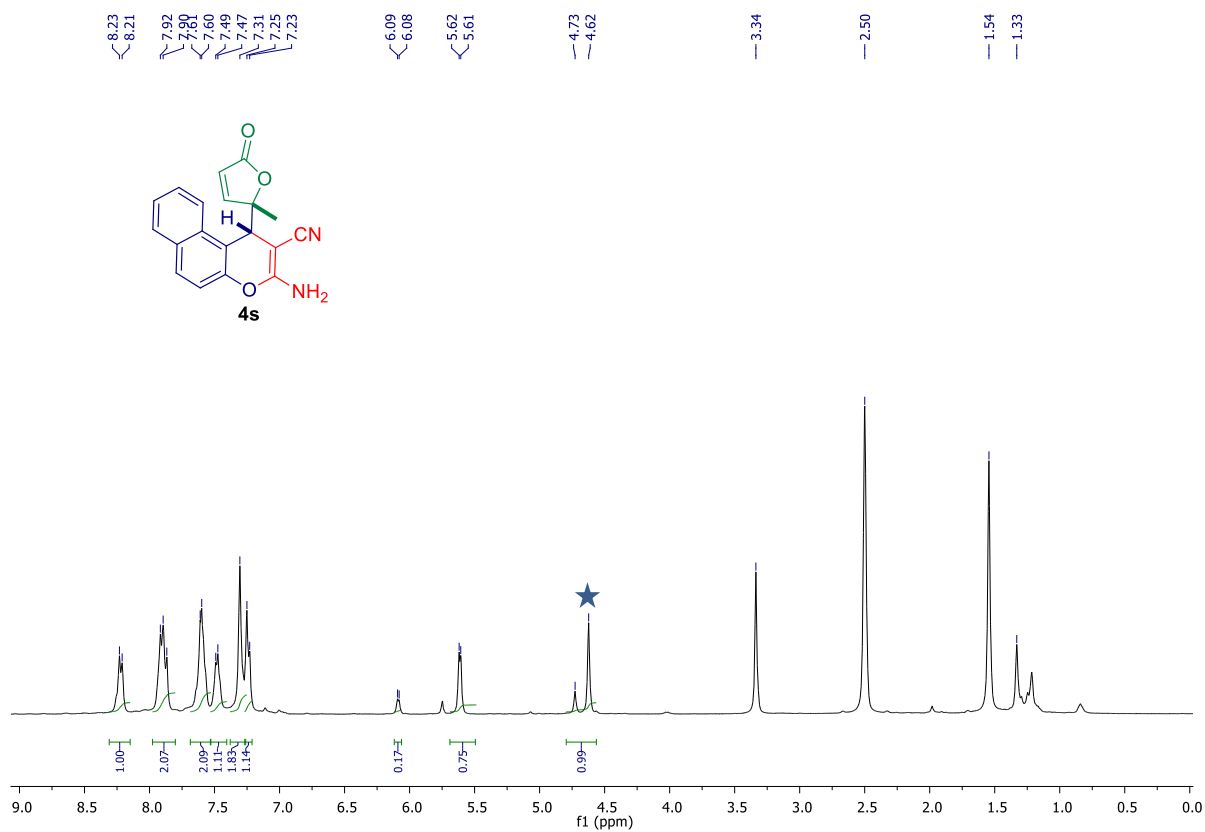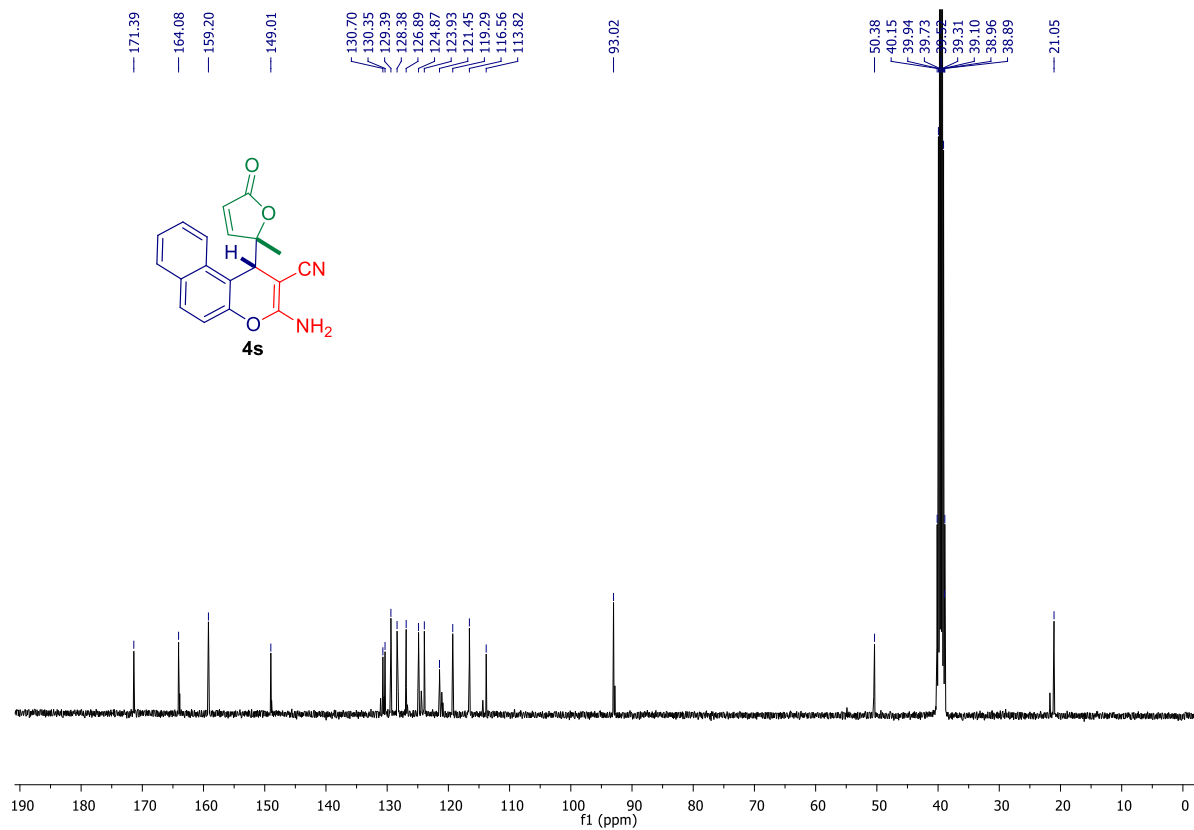

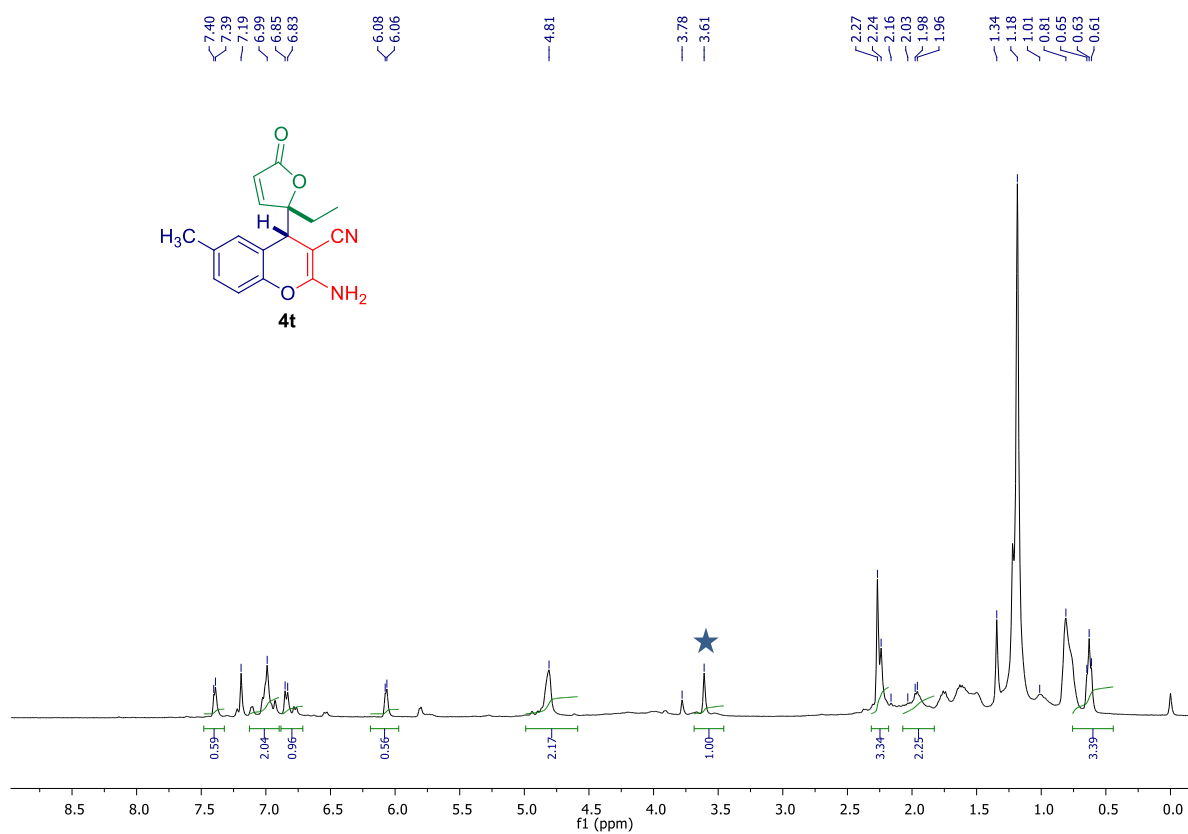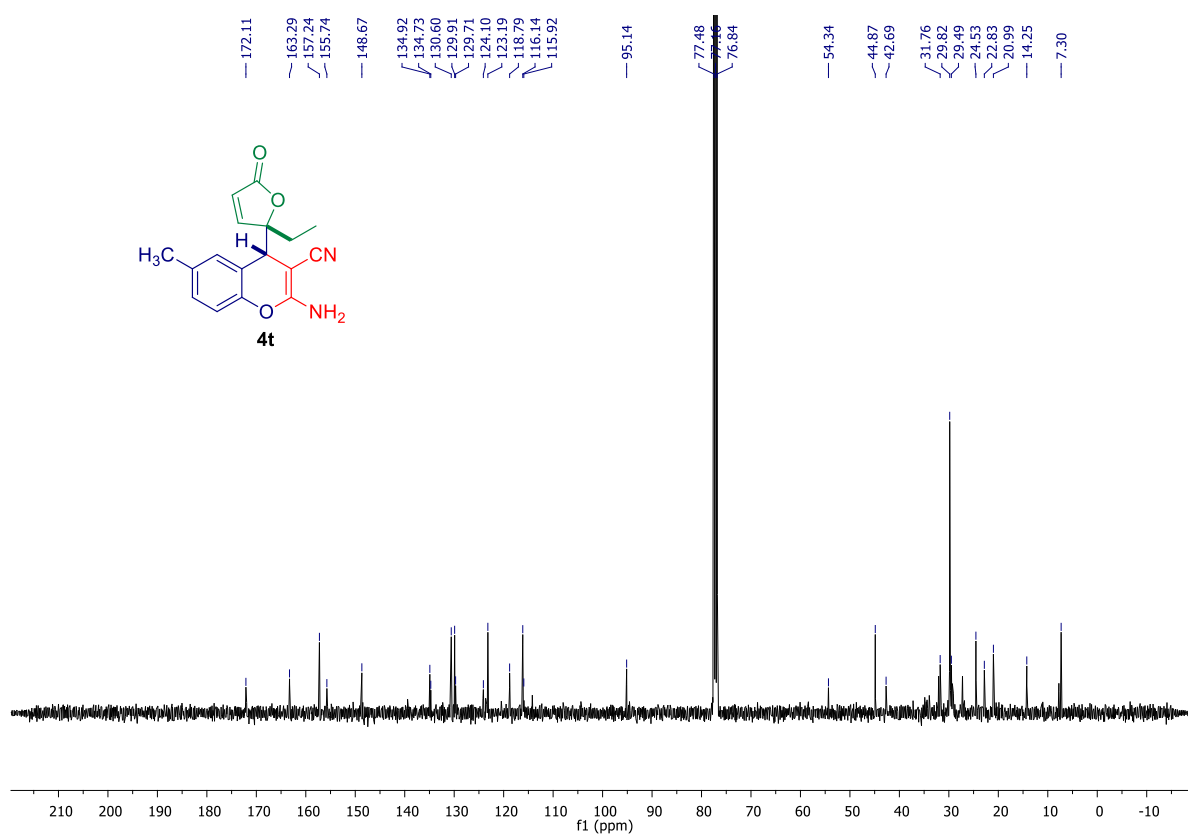

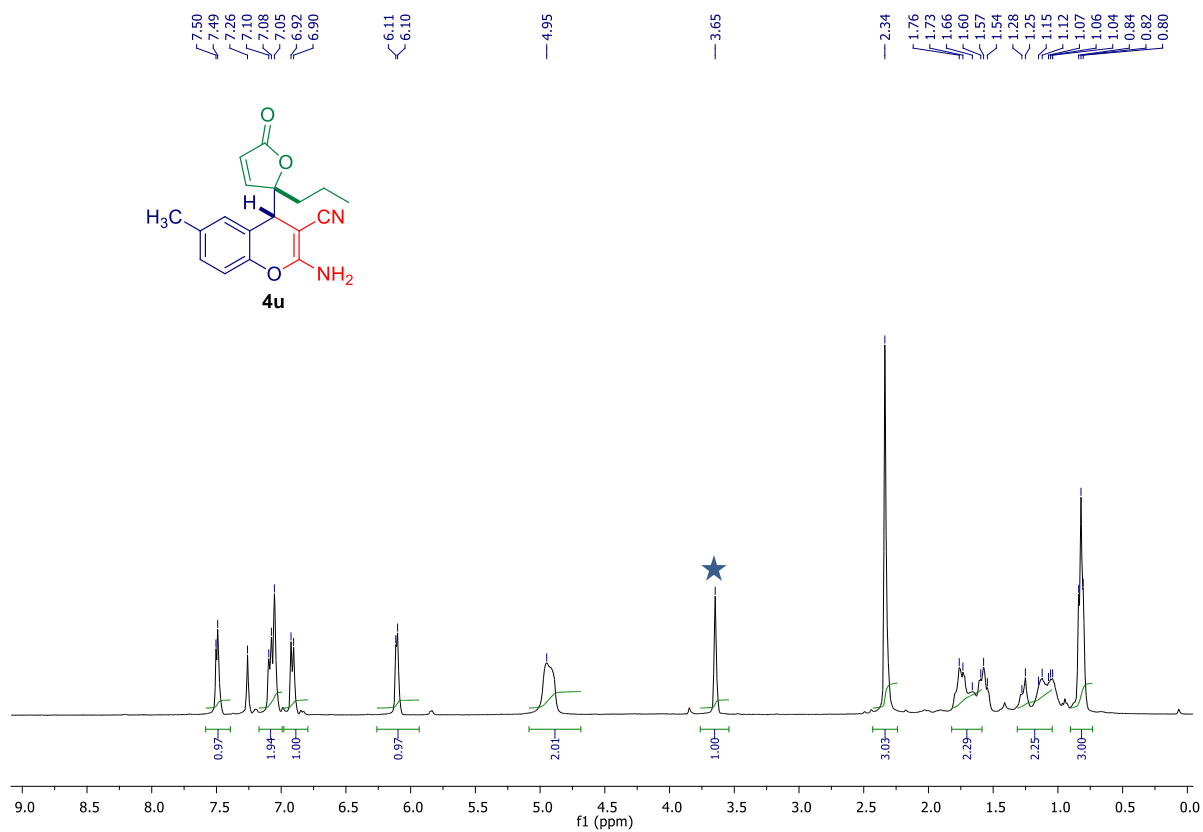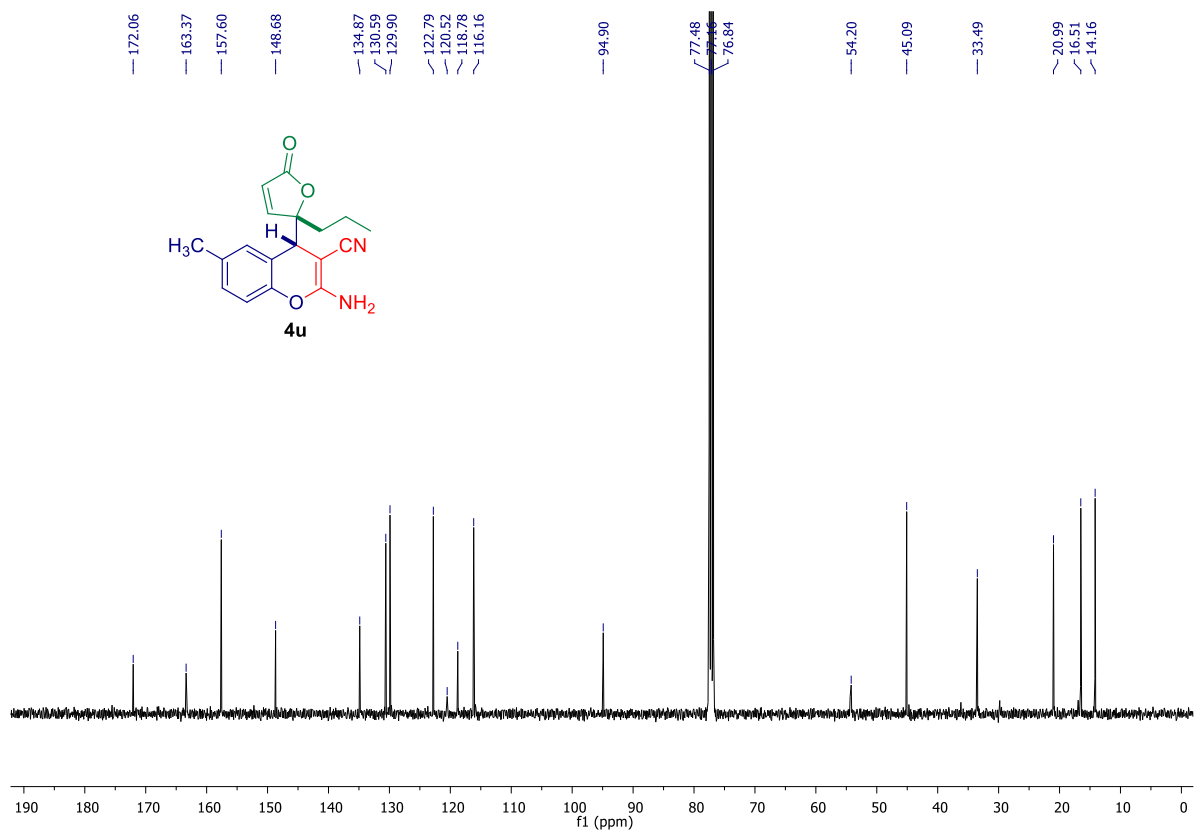

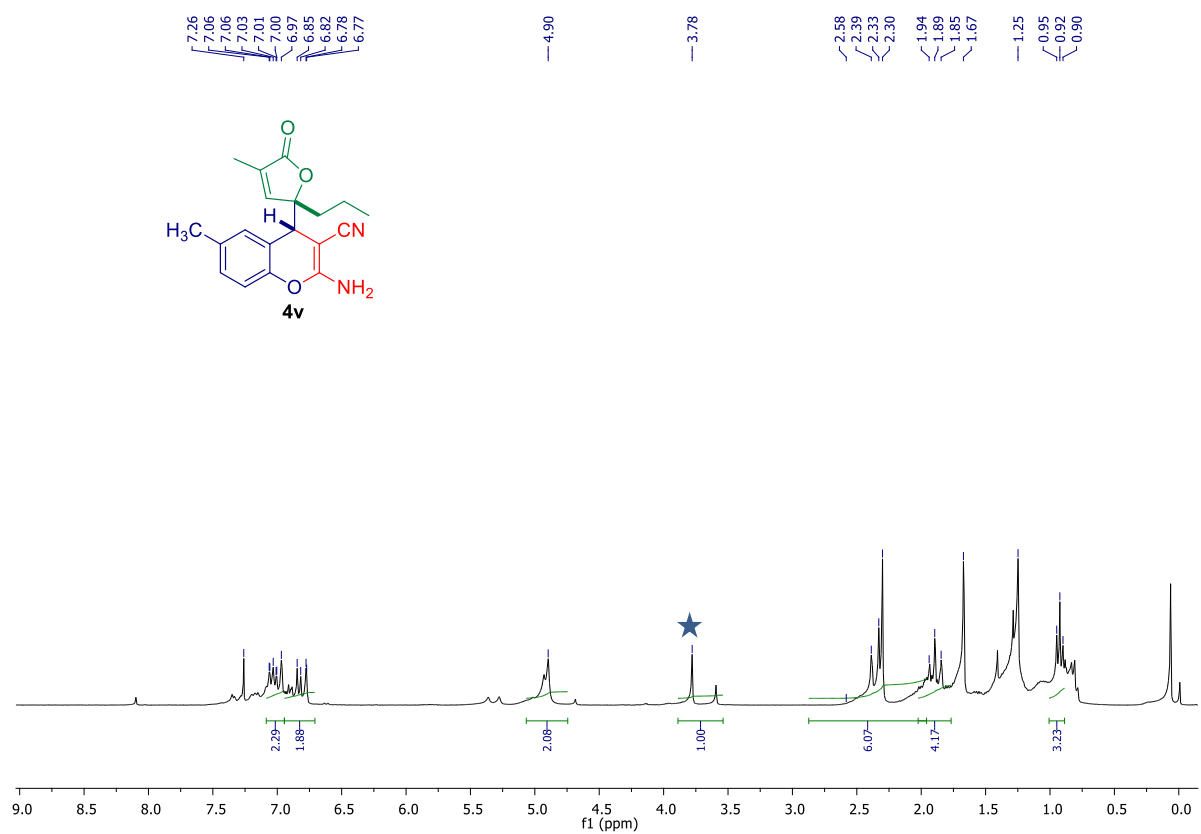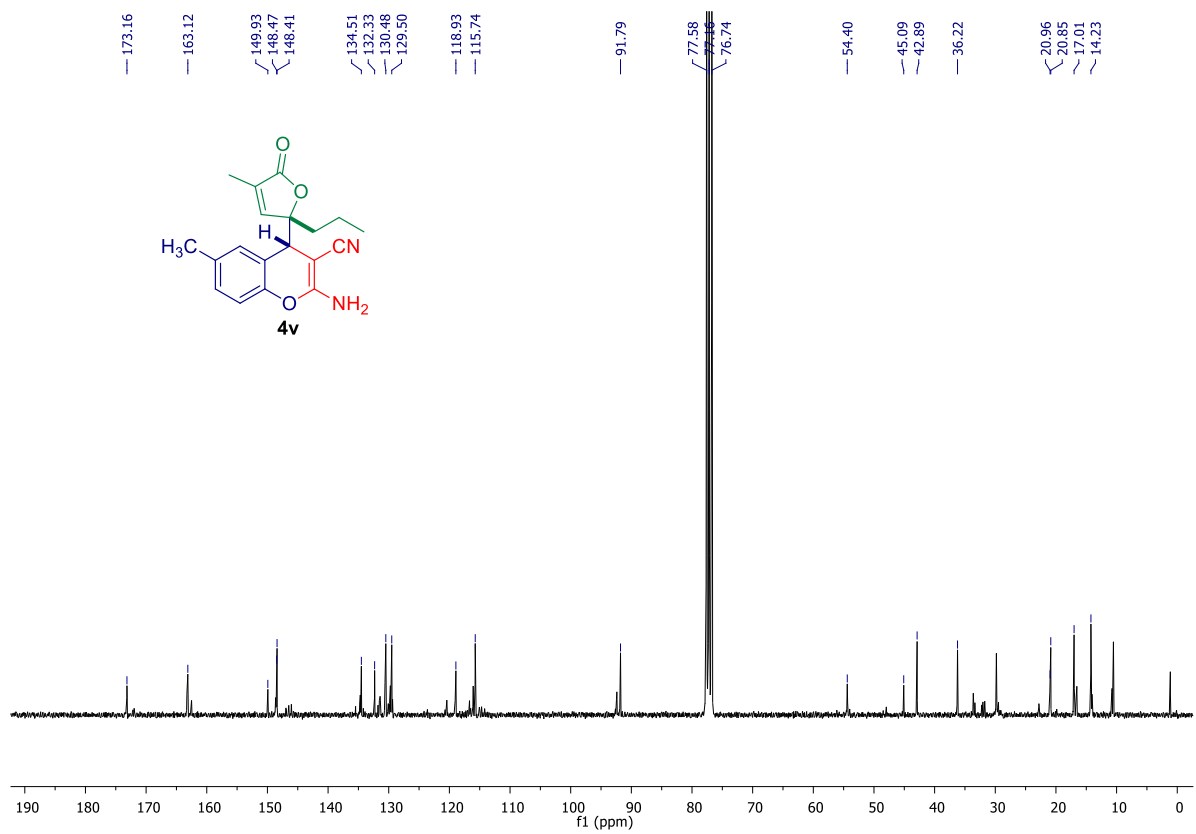

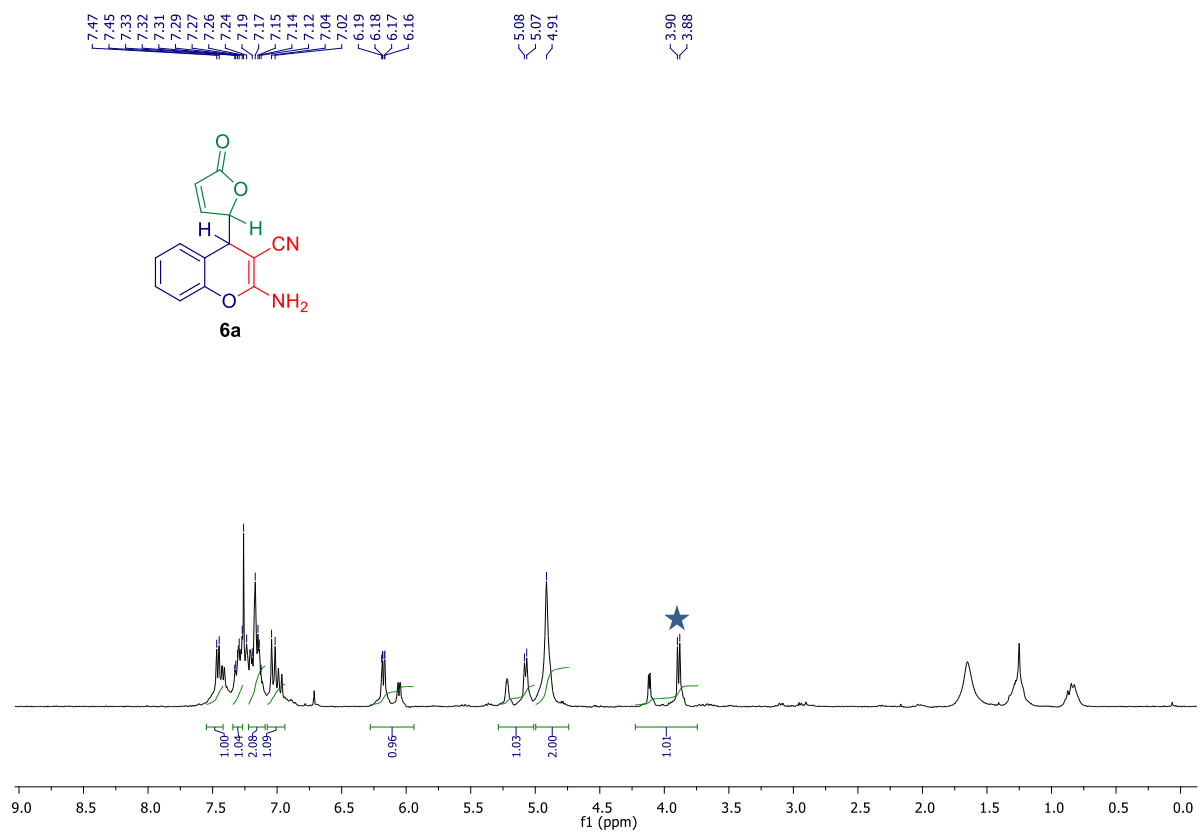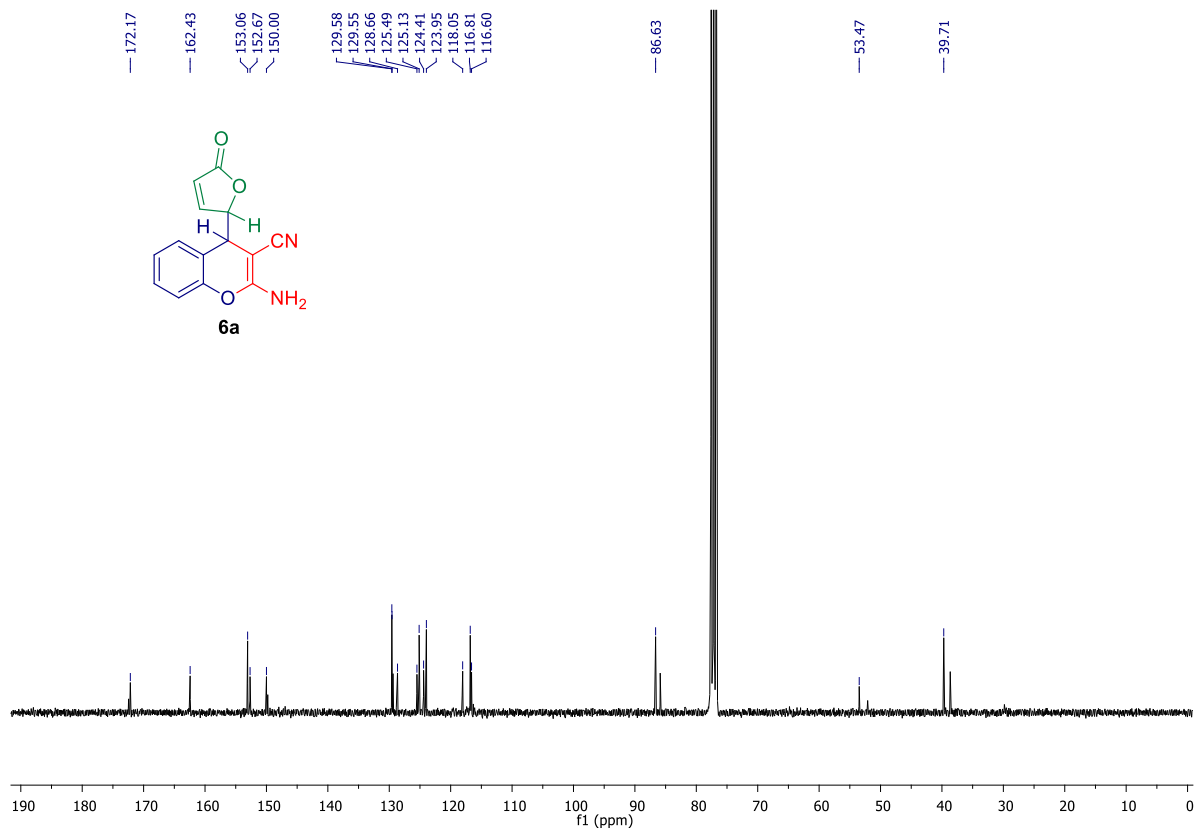

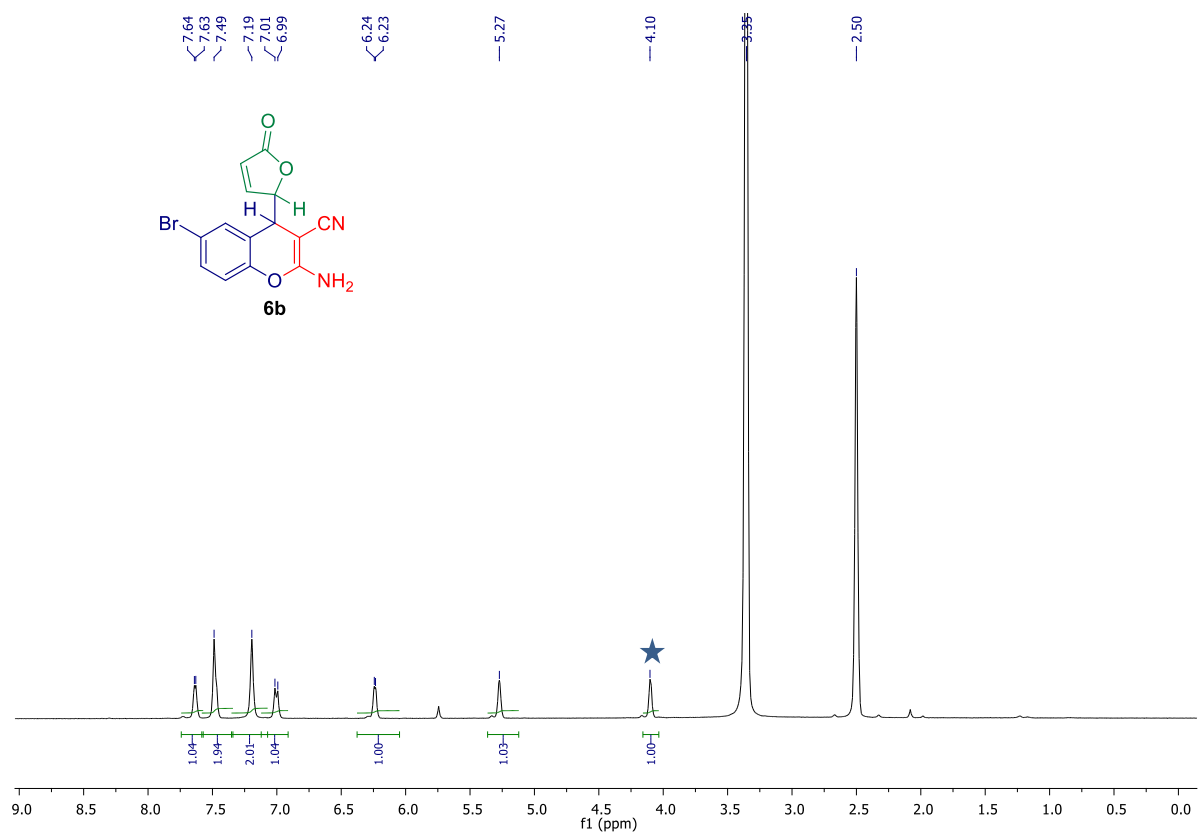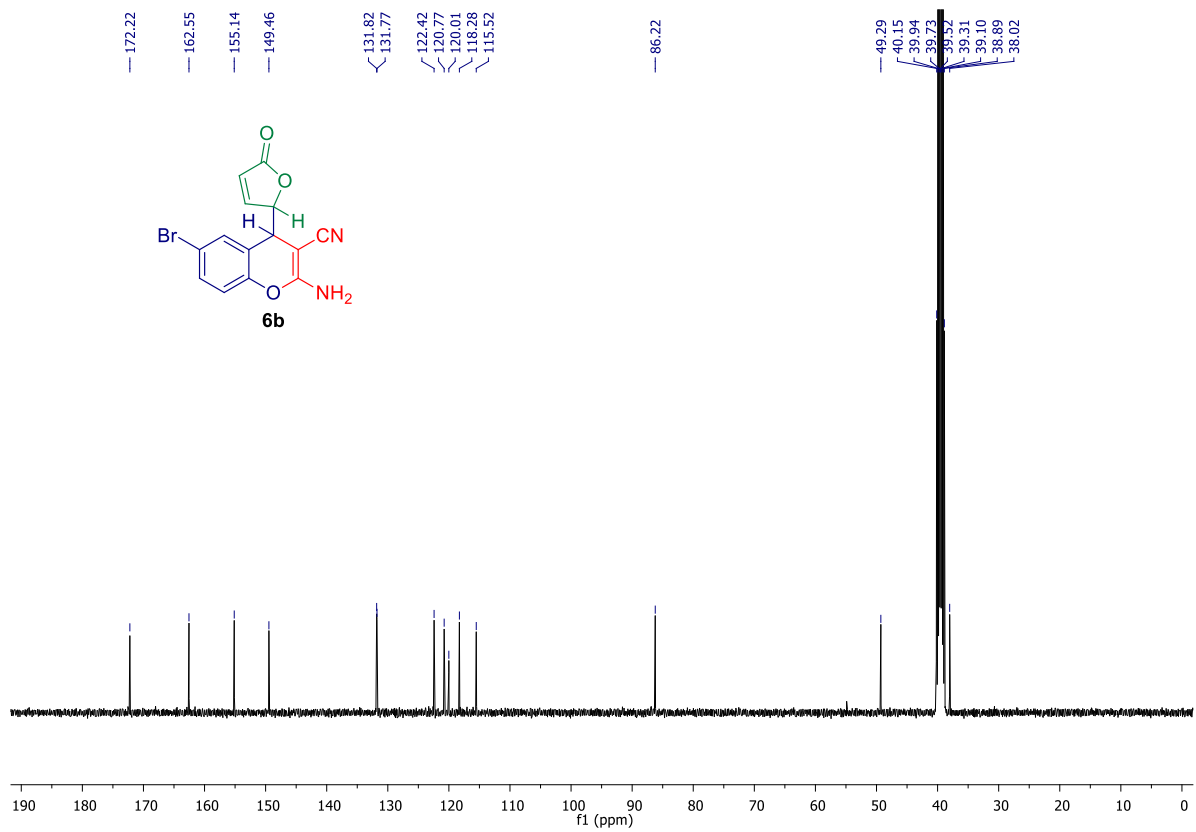

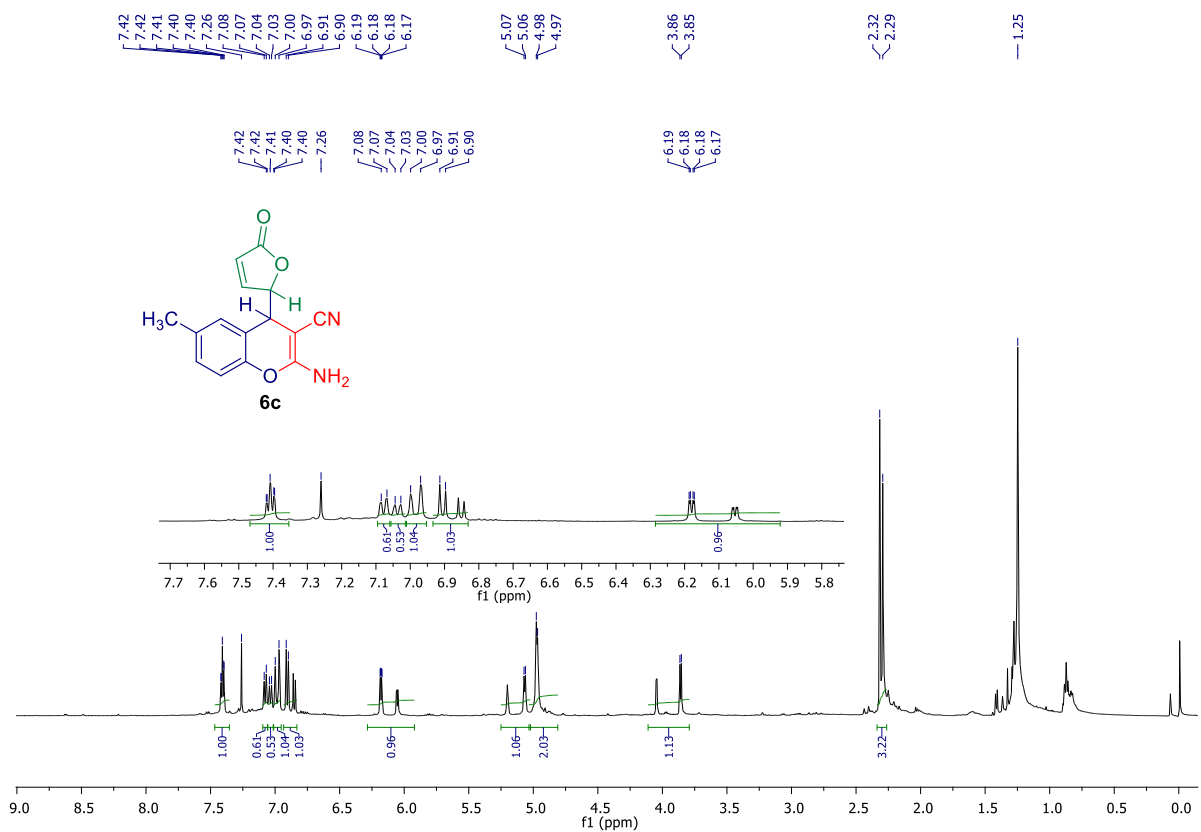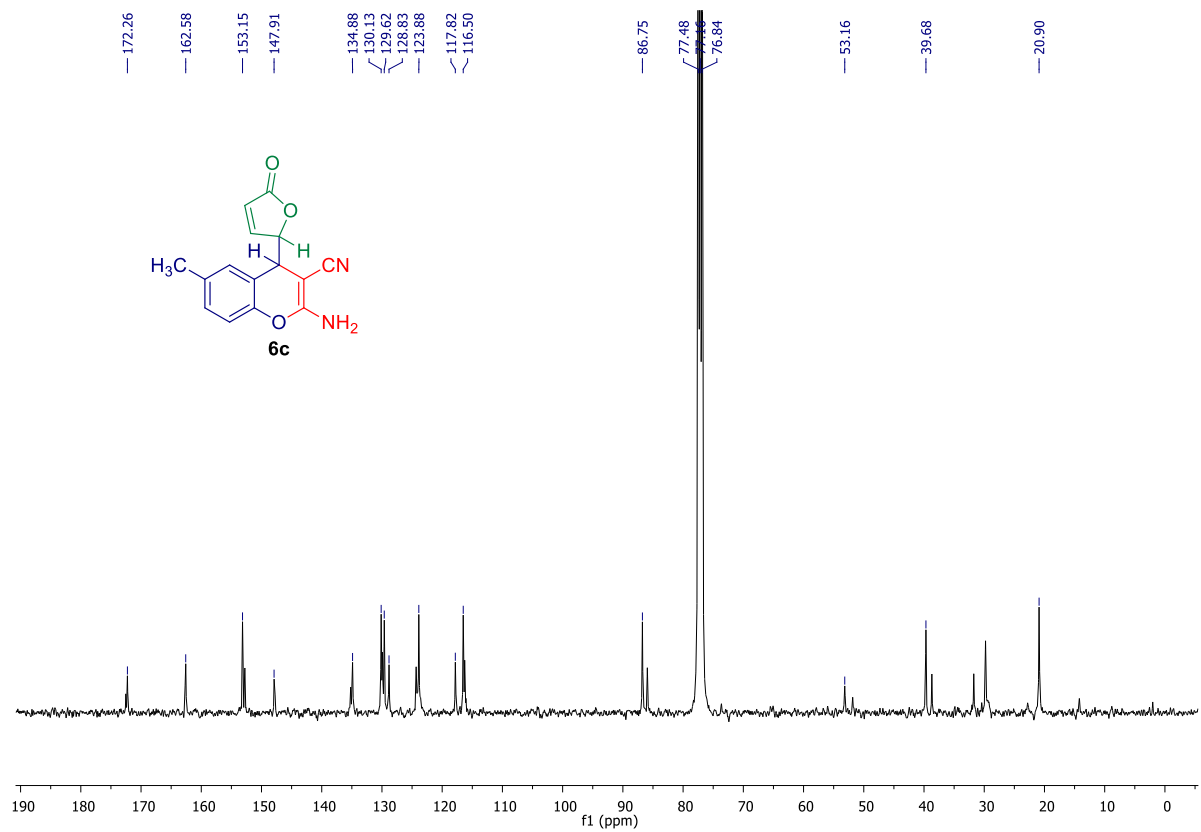

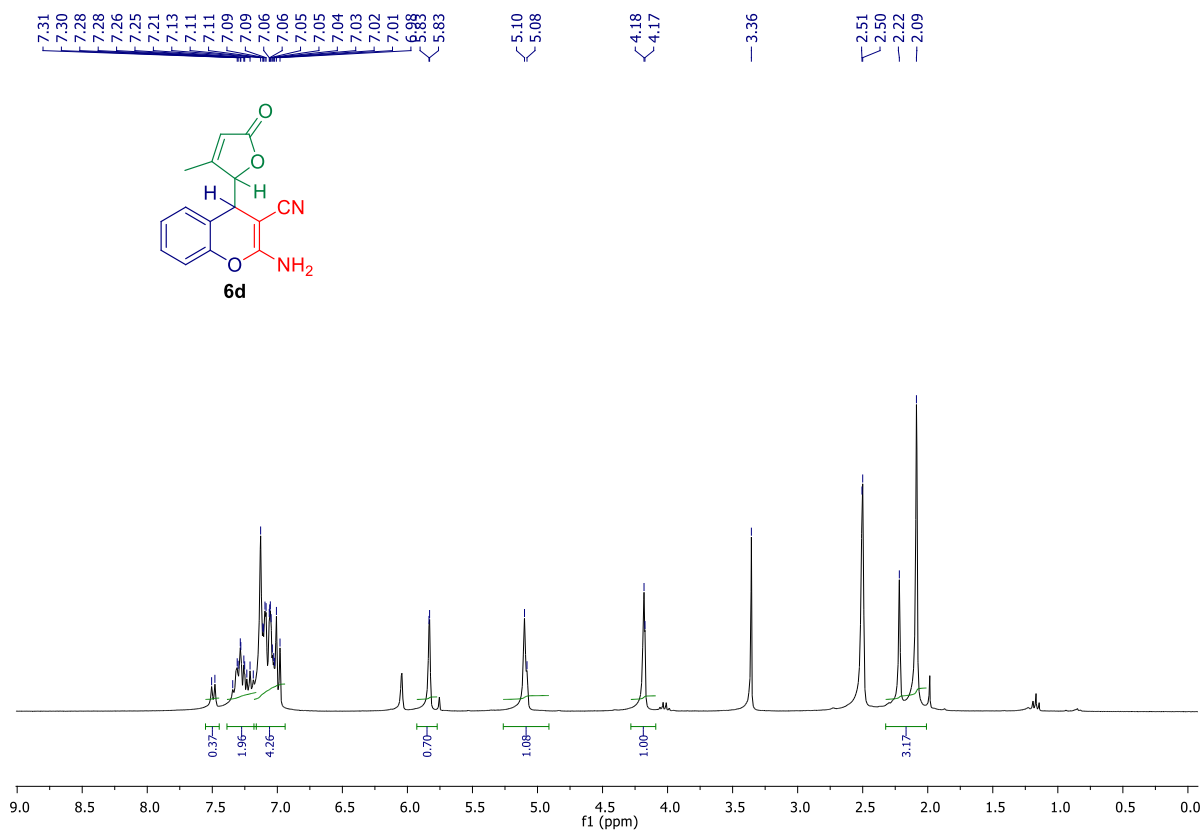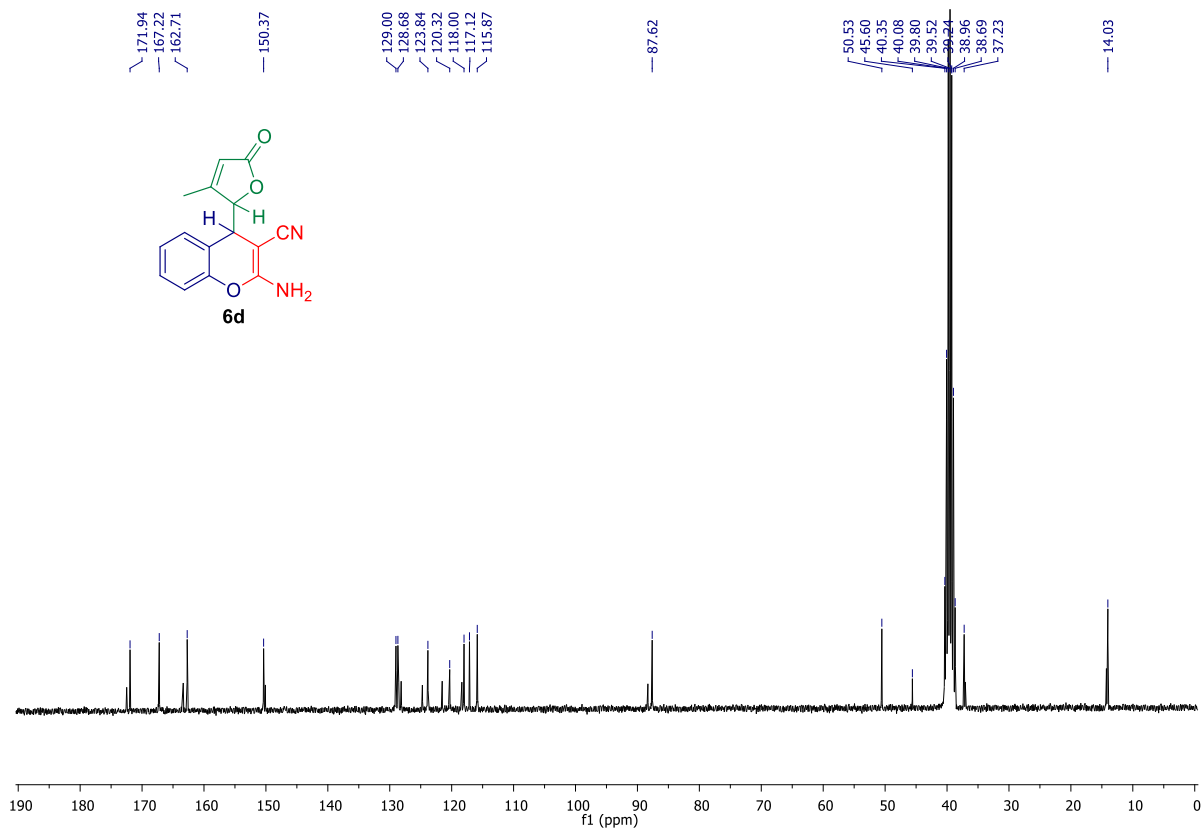

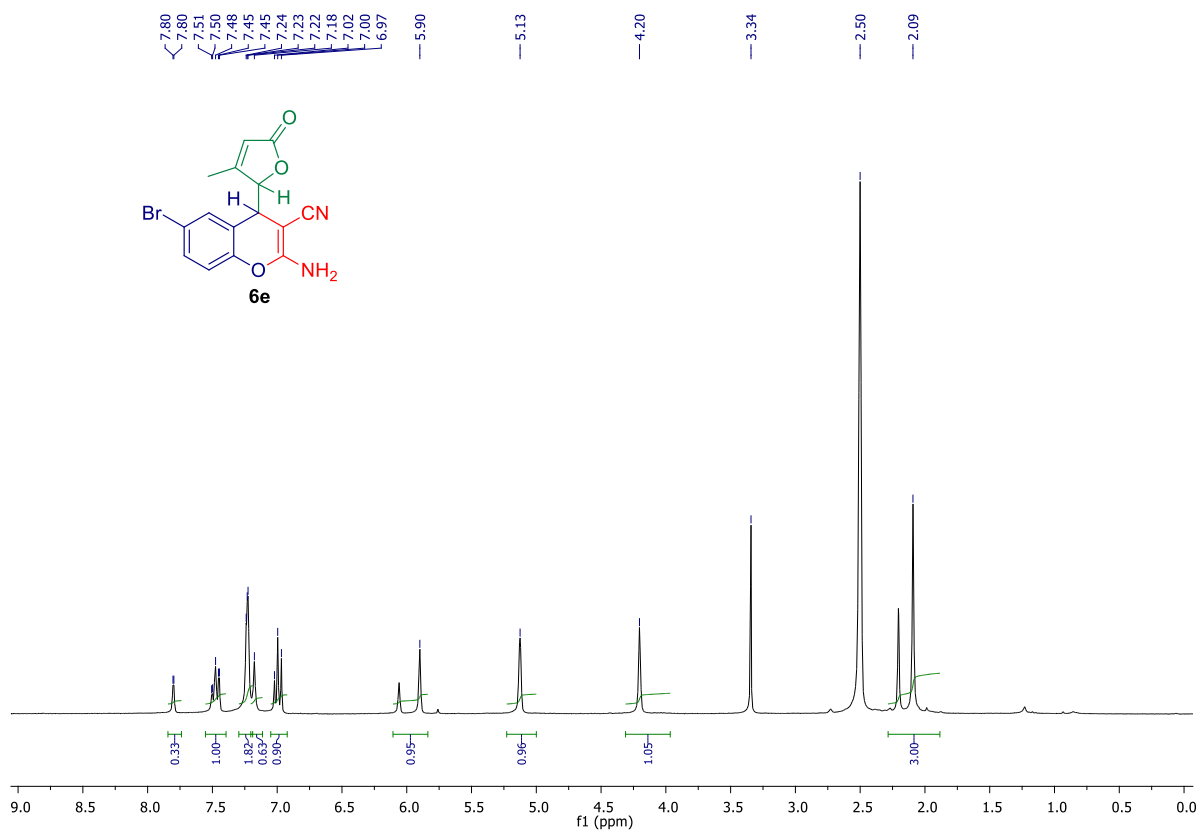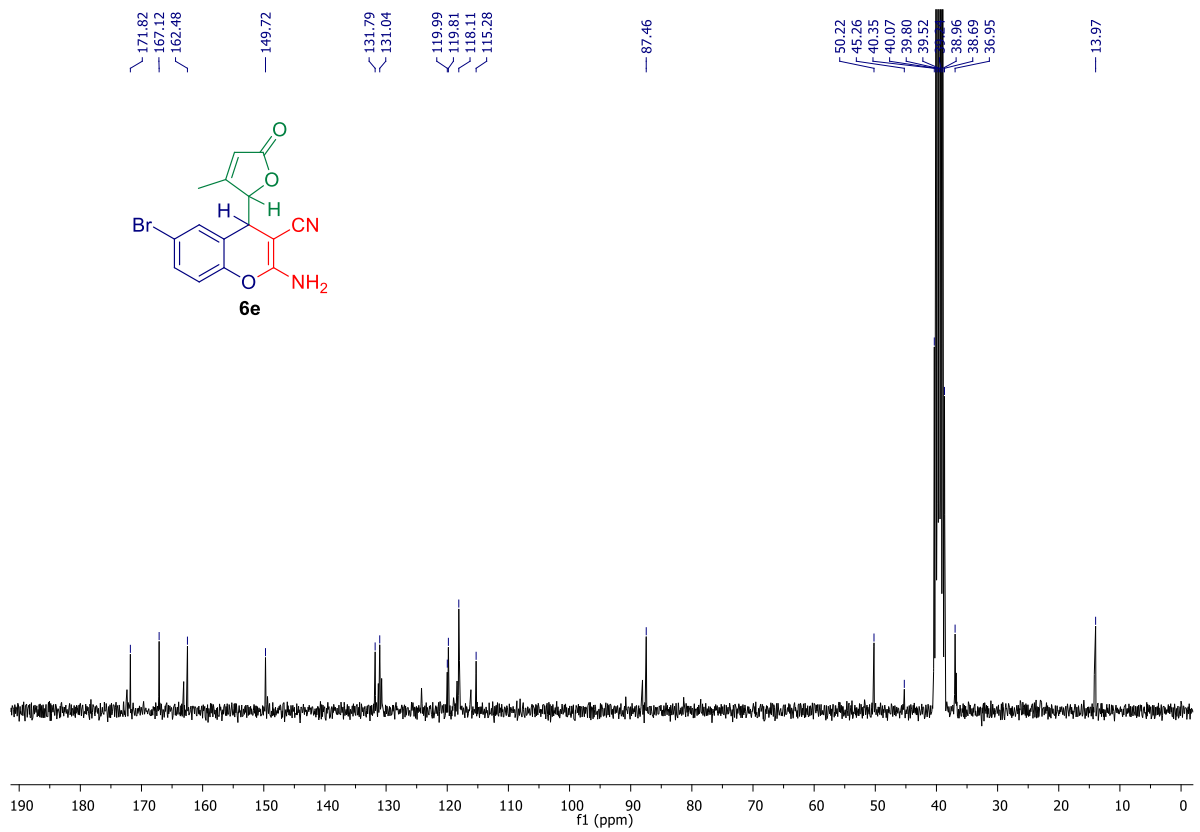

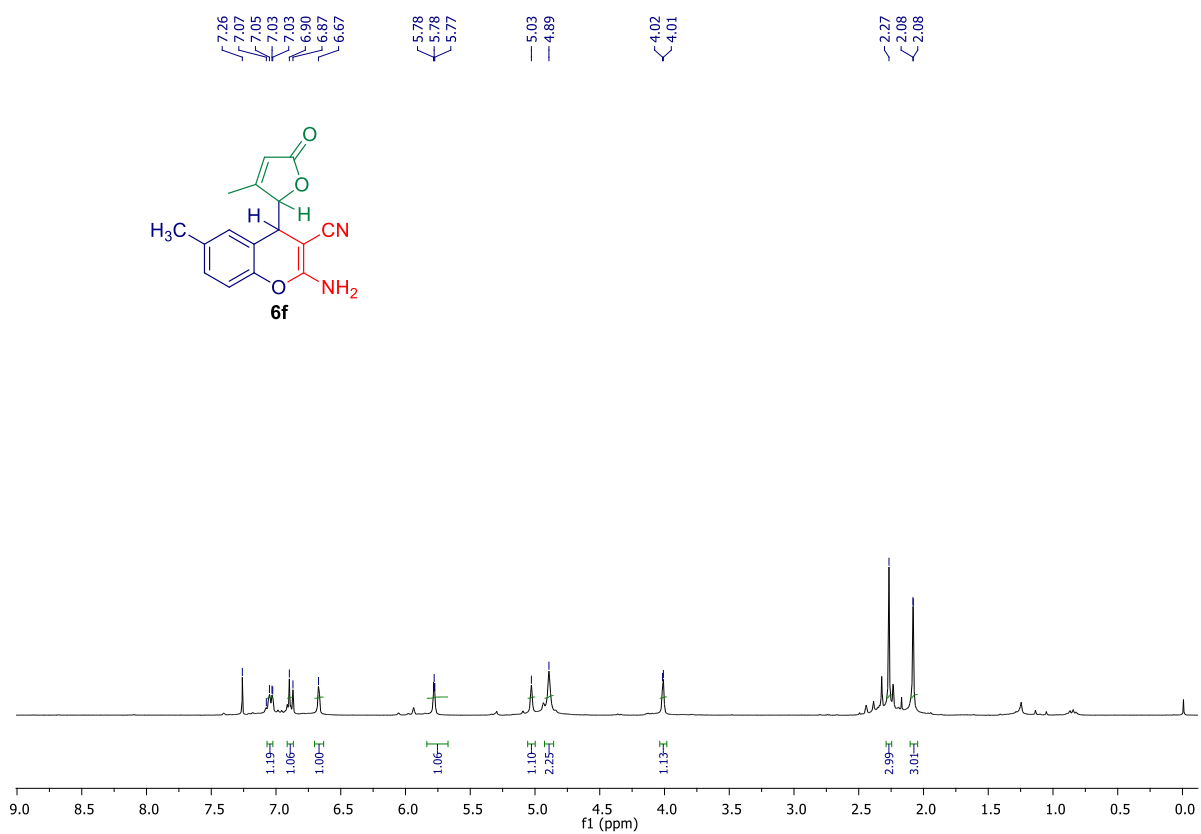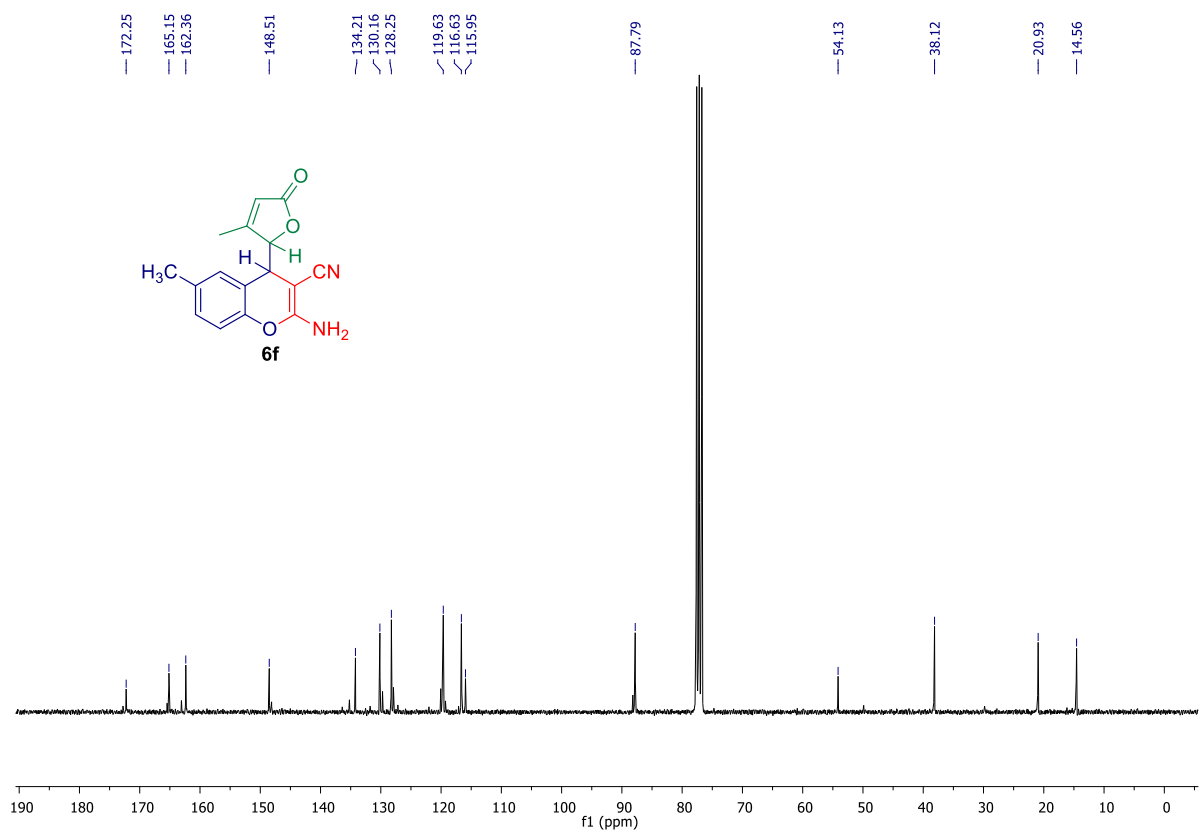

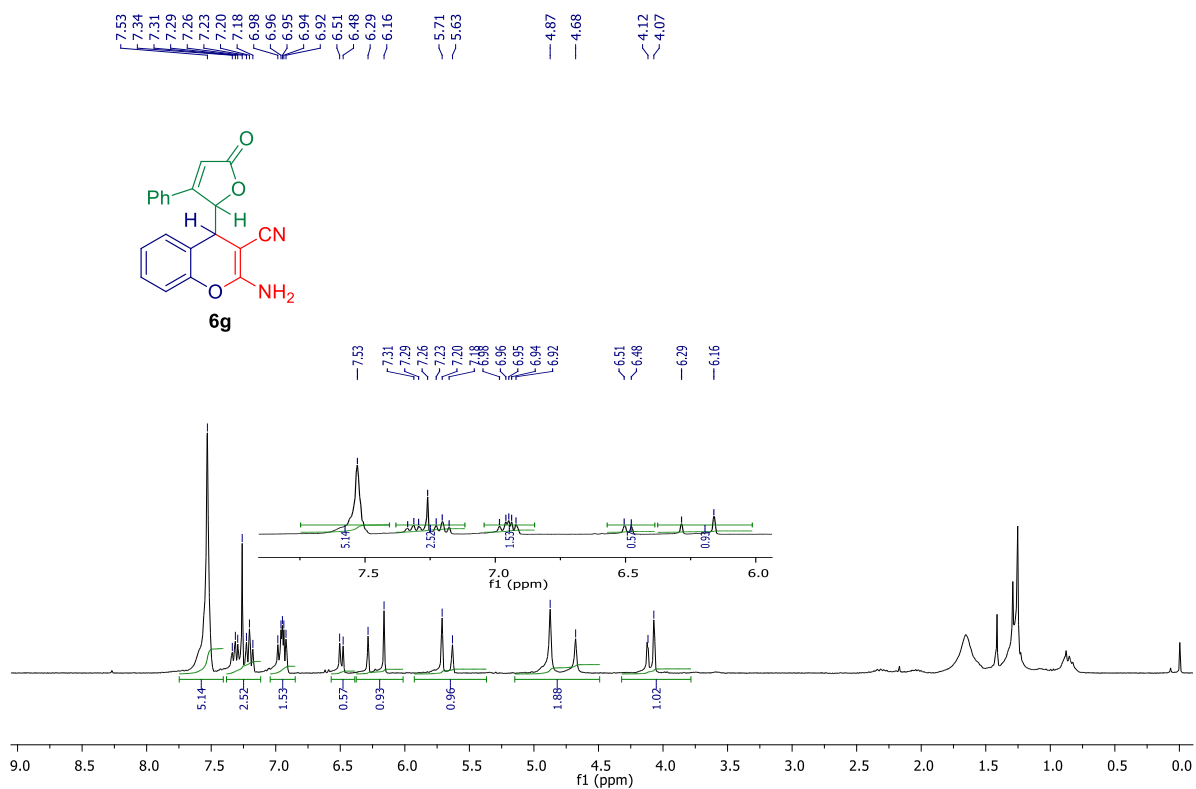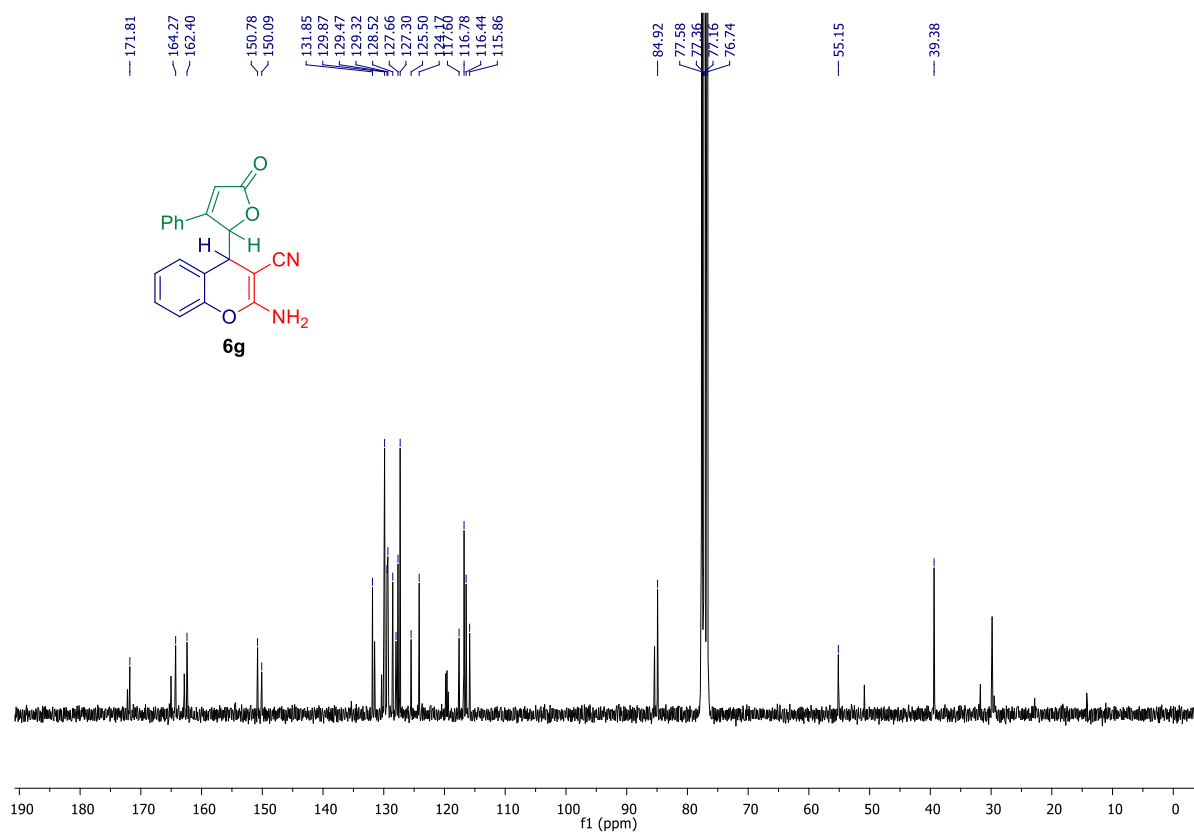

## 6. HPLC data for compound 4c and 8a

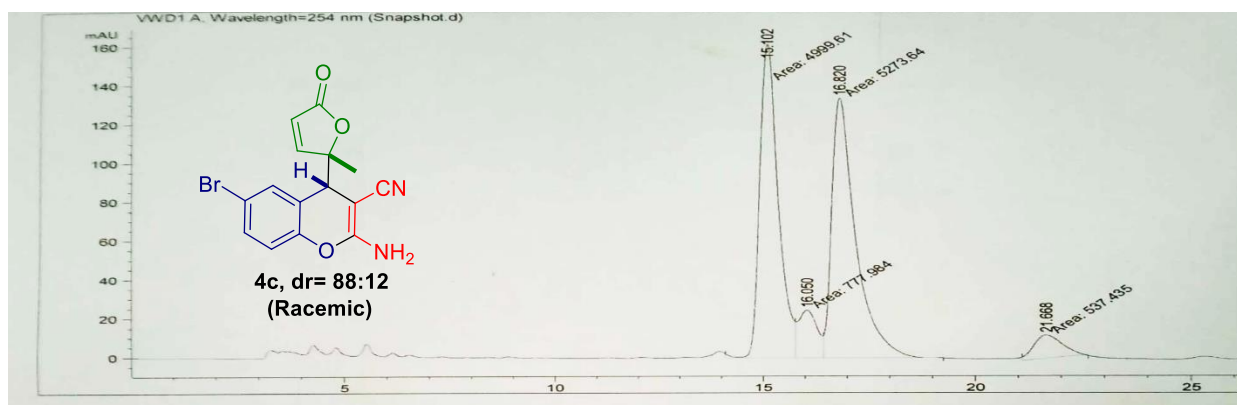

Signal 1: VWD1 A, Wavelength=254 nm

| Peak #   | RetTime [min] | Type | Width [min] | Area [mAU*s] | Height [mAU] | Area %  |
|----------|---------------|------|-------------|--------------|--------------|---------|
| 1        | 15.102        | MF   | 0.5151      | 4999.61182   | 161.76991    | 43.1423 |
| 2        | 16.050        | MF   | 0.5238      | 777.98352    | 24.75528     | 6.7133  |
| 3        | 16.820        | FM   | 0.6539      | 5273.63672   | 134.42325    | 45.5068 |
| 4        | 21.668        | MM   | 0.7582      | 537.43457    | 11.81440     | 4.6376  |
| Totals : |               |      |             | 1.15887e4    | 332.76284    |         |

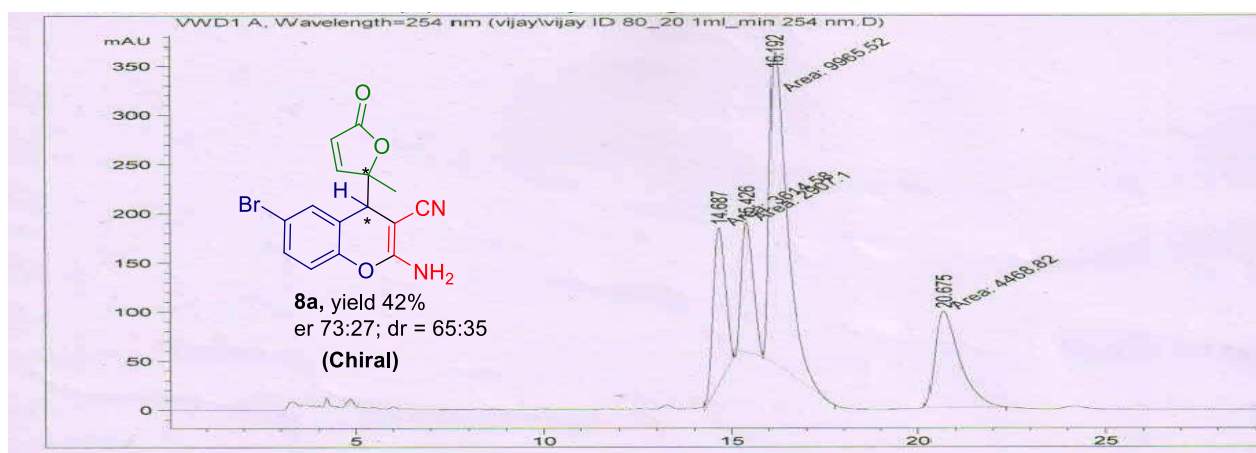

Signal 1: VWD1 A, Wavelength=254 nm

| Peak #   | RetTime [min] | Type | Width [min] | Area [mAU*s] | Height [mAU] | Area %  |
|----------|---------------|------|-------------|--------------|--------------|---------|
| 1        | 14.687        | MM   | 0.3811      | 3614.57959   | 158.08736    | 17.2484 |
| 2        | 15.426        | MM   | 0.3662      | 2907.09790   | 132.30377    | 13.8724 |
| 3        | 16.192        | MM   | 0.5222      | 9965.52051   | 318.09244    | 47.5544 |
| 4        | 20.675        | MM   | 0.7615      | 4468.82422   | 97.80679     | 21.3248 |
| Totals : |               |      |             | 2.09560e4    | 706.29035    |         |

## 7. Computational Details

All the calculations in this study have been performed with density functional theory (DFT), with the aid of the Turbomole 7.2 suite of programs,<sup>1</sup> using the PBE functional.<sup>2</sup> The TZVP<sup>3</sup> basis set has been employed. The resolution of identity (RI),<sup>4</sup> along with the multipole accelerated resolution of identity (marij)<sup>5</sup> approximations have been employed for an accurate and efficient treatment of the electronic Coulomb term in the DFT calculations. Solvent correction were incorporated with optimization calculations using the COSMO model,<sup>6</sup> with 1,4-dioxane ( $\epsilon = 2.25$ ) as the solvent. The values reported are  $\Delta G$  values, with zero point energy corrections, internal energy and entropic contributions included through frequency calculations on the optimized minima, with the temperature taken to be 298.15 K. Harmonic frequency calculations were performed for all stationary points to confirm them as a local minima or transition state structures.

To confirm the negative charge on oxygen, we have performed NBO charge analysis.

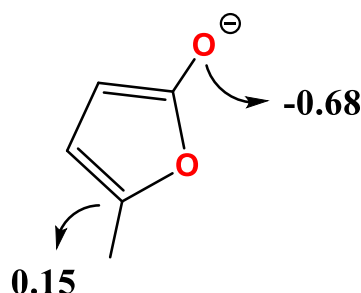

**Figure S3.** Charge values obtained by NBO analysis. Which shows that anion on the oxygen (-0.68) atom is more stable than a carbon atom (0.15).

### References:

- (1) Ahlrichs, R.; Bar, M.; Häser, M.; Horn, H.; Kölmel, C. *Chem. Phys. Lett.* **1989**, *162*, 165–169.
- (2) Perdew, J. P.; Burke, K.; Ernzerhof, M. *Phys. Rev. Lett.* **1996**, *77*, 3865.
- (3) Ansgar, S.; Christian, H.; Reinhart, A. *J. Chem. Phys.* **1994**, *100*, 5829–5835.
- (4) Eichkorn, K.; Treutler, O.; Öhm, H.; Häser, M.; Ahlrichs, R. *Chem. Phys. Lett.* **1995**, *240*, 283–289.
- (5) Sierka, M.; Hoge Kamp, A.; Ahlrichs, R. *J. Chem. Phys.* **2003**, *118*, 9136–9148.

(6) Klamt, A.; Schuurmann, G. *J. Chem. Soc., Perkin Trans.* **21993**, 799–805.

**PBE/TZVP optimized geometries for all the compounds and transition states**

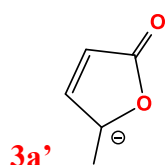

Absolute Energy Value: -343.7817258257 hartree

Number of Imaginary Frequency: 0

|   |          |          |          |
|---|----------|----------|----------|
| H | 3.158875 | 2.915487 | 2.549474 |
| C | 2.860049 | 3.938536 | 2.847982 |
| H | 1.982215 | 4.204281 | 2.227622 |
| H | 2.528976 | 3.898122 | 3.896918 |
| C | 3.969769 | 4.917753 | 2.714131 |
| O | 4.516711 | 5.080277 | 1.450360 |
| C | 5.577504 | 6.090164 | 1.540506 |
| O | 6.199658 | 6.377328 | 0.494779 |
| C | 5.603541 | 6.485324 | 2.888930 |
| H | 6.294140 | 7.223015 | 3.289203 |
| C | 4.599814 | 5.747754 | 3.602523 |
| H | 4.361804 | 5.821130 | 4.664002 |

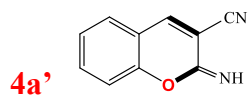

Absolute Energy Value: -568.8969521999 hartree

Number of Imaginary Frequency: 0

|   |          |          |          |
|---|----------|----------|----------|
| C | 2.911472 | 3.180980 | 2.092306 |
| C | 3.132274 | 4.290216 | 2.925204 |

|   |           |          |           |
|---|-----------|----------|-----------|
| C | 2.441915  | 5.485991 | 2.726086  |
| C | 1.522379  | 5.566983 | 1.680704  |
| C | 1.278463  | 4.465902 | 0.830514  |
| C | 1.990804  | 3.268958 | 1.054876  |
| O | 0.863049  | 6.759920 | 1.511057  |
| C | -0.084828 | 6.960370 | 0.499447  |
| C | -0.348657 | 5.812073 | -0.378559 |
| C | 0.310560  | 4.625724 | -0.213959 |
| C | -1.316908 | 5.974881 | -1.408825 |
| N | -2.106238 | 6.066800 | -2.263426 |
| N | -0.671062 | 8.082880 | 0.369100  |
| H | -0.351198 | 8.756001 | 1.076598  |
| H | 0.099659  | 3.787264 | -0.880427 |
| H | 3.852857  | 4.221324 | 3.741889  |
| H | 2.603453  | 6.354129 | 3.365929  |
| H | 1.804093  | 2.415438 | 0.399444  |
| H | 3.459904  | 2.253629 | 2.261447  |

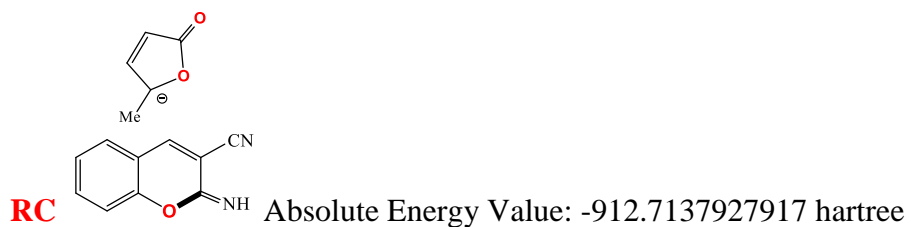

Number of Imaginary Frequency: 0

|   |           |           |           |
|---|-----------|-----------|-----------|
| O | -1.394493 | -1.105136 | -1.151823 |
| C | -2.077002 | -0.201206 | -0.374780 |

|   |           |           |           |
|---|-----------|-----------|-----------|
| C | -2.534206 | -0.817746 | 0.779556  |
| C | -2.100908 | -2.158812 | 0.759207  |
| C | -1.389994 | -2.385119 | -0.451698 |
| C | 0.079211  | 0.962164  | 1.255291  |
| C | 0.808081  | -0.216353 | 0.938235  |
| C | 1.680069  | -0.180162 | -0.177487 |
| O | 1.859273  | 0.982756  | -0.903348 |
| C | 1.234673  | 2.190805  | -0.563860 |
| C | 0.315879  | 2.151301  | 0.563090  |
| C | 2.397793  | -1.297727 | -0.582446 |
| C | 2.251884  | -2.496610 | 0.129643  |
| C | 1.419640  | -2.560045 | 1.250538  |
| C | 0.686032  | -1.440668 | 1.639962  |
| N | 1.498153  | 3.243217  | -1.251971 |
| C | -0.351574 | 3.341490  | 0.931222  |
| N | -0.930086 | 4.301340  | 1.275282  |
| C | -2.351073 | 1.127179  | -0.963178 |
| O | -0.828154 | -3.349422 | -0.976944 |
| H | 0.028283  | -1.480618 | 2.507948  |
| H | -0.591498 | 0.961163  | 2.113758  |
| H | 1.302578  | -3.500764 | 1.790318  |
| H | -2.873108 | 1.038574  | -1.930756 |
| H | -3.122172 | -0.322151 | 1.549884  |

|   |           |           |           |
|---|-----------|-----------|-----------|
| H | 2.800055  | -3.382265 | -0.195870 |
| H | -2.973127 | 1.721251  | -0.279782 |
| H | -1.422250 | 1.699880  | -1.143227 |
| H | 3.045747  | -1.228035 | -1.457163 |
| H | 2.173575  | 3.014301  | -1.991545 |
| H | -2.275380 | -2.931479 | 1.502236  |

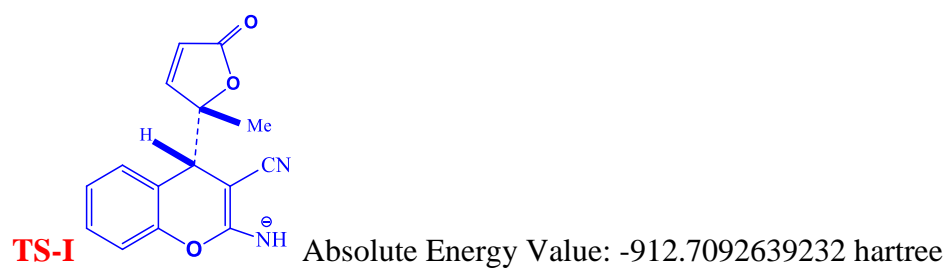

Number of Imaginary Frequency: 1 (-185.00 cm<sup>-1</sup>)

|   |          |           |          |
|---|----------|-----------|----------|
| O | 5.090353 | 8.219743  | 1.006431 |
| C | 3.831034 | 8.417135  | 1.592574 |
| C | 3.385919 | 7.156860  | 2.076092 |
| C | 4.395273 | 6.232456  | 1.916075 |
| C | 5.496461 | 6.879123  | 1.239171 |
| C | 4.264238 | 9.485315  | 3.476331 |
| C | 5.547669 | 8.884681  | 3.788354 |
| C | 6.712739 | 9.573105  | 3.392985 |
| O | 6.647928 | 10.796444 | 2.764431 |
| C | 5.452645 | 11.550541 | 2.726643 |
| C | 4.262402 | 10.885781 | 3.196038 |
| C | 7.983067 | 9.043949  | 3.621245 |

|   |          |           |           |
|---|----------|-----------|-----------|
| C | 8.107289 | 7.804353  | 4.254198  |
| C | 6.968470 | 7.109102  | 4.674634  |
| C | 5.701752 | 7.644279  | 4.433770  |
| N | 5.516481 | 12.758416 | 2.283340  |
| C | 3.072412 | 11.626024 | 3.318344  |
| N | 2.053963 | 12.197279 | 3.453236  |
| C | 2.986821 | 9.429400  | 0.895944  |
| O | 6.601685 | 6.490782  | 0.872963  |
| H | 4.806288 | 7.106496  | 4.749180  |
| H | 3.394924 | 9.089669  | 4.000763  |
| H | 7.066608 | 6.142304  | 5.171588  |
| H | 2.804476 | 9.134561  | -0.151155 |
| H | 2.410785 | 6.999806  | 2.536710  |
| H | 9.101242 | 7.385696  | 4.425752  |
| H | 2.018442 | 9.531591  | 1.406334  |
| H | 3.475756 | 10.416142 | 0.898861  |
| H | 8.858048 | 9.607143  | 3.293219  |
| H | 6.492131 | 12.991609 | 2.061699  |
| H | 4.423574 | 5.195753  | 2.237694  |

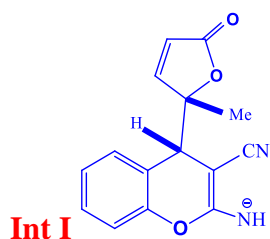

Absolute Energy Value: -912.7201081669 hartree

Number of Imaginary Frequency: 0

|   |           |           |           |
|---|-----------|-----------|-----------|
| O | -1.280017 | -0.407932 | -1.278738 |
| C | -1.684408 | 0.172135  | -0.003258 |
| C | -2.337641 | -0.966141 | 0.707874  |
| C | -2.273465 | -2.081268 | -0.040311 |
| C | -1.595550 | -1.751354 | -1.305563 |
| C | -0.369371 | 0.690730  | 0.769592  |
| C | 0.668970  | -0.395050 | 0.831081  |
| C | 1.662239  | -0.415965 | -0.162935 |
| O | 1.741914  | 0.547743  | -1.131188 |
| C | 1.160145  | 1.841609  | -0.907442 |
| C | 0.238083  | 1.929244  | 0.172160  |
| C | 2.616901  | -1.441059 | -0.201576 |
| C | 2.599720  | -2.441023 | 0.770940  |
| C | 1.642613  | -2.414709 | 1.792351  |
| C | 0.686719  | -1.395290 | 1.810202  |
| N | 1.546366  | 2.790414  | -1.697596 |
| C | -0.177241 | 3.175650  | 0.642379  |
| N | -0.560294 | 4.194377  | 1.099503  |
| C | -2.638951 | 1.326932  | -0.278307 |
| O | -1.327960 | -2.459825 | -2.261919 |
| H | -0.075260 | -1.376548 | 2.594416  |
| H | -0.729099 | 0.913504  | 1.787375  |

|   |           |           |           |
|---|-----------|-----------|-----------|
| H | 1.636227  | -3.187457 | 2.563614  |
| H | -3.525996 | 0.967259  | -0.817984 |
| H | -2.772560 | -0.854749 | 1.701280  |
| H | 3.346221  | -3.237830 | 0.737263  |
| H | -2.954802 | 1.791799  | 0.666534  |
| H | -2.122438 | 2.087510  | -0.878376 |
| H | 3.365935  | -1.430031 | -0.995360 |
| H | 2.306443  | 2.445192  | -2.295686 |
| H | -2.626813 | -3.083201 | 0.190381  |

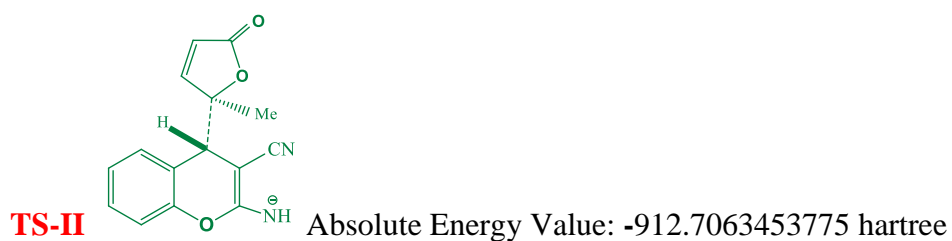

Number of Imaginary Frequency: 0 (-71.92 cm<sup>-1</sup>)

|   |          |          |           |
|---|----------|----------|-----------|
| C | 5.222751 | 5.351532 | -1.657819 |
| C | 4.453721 | 4.405349 | -0.962984 |
| O | 3.618007 | 5.079468 | -0.077485 |
| C | 3.790736 | 6.488283 | -0.280423 |
| C | 4.803704 | 6.625660 | -1.287781 |
| C | 4.793331 | 3.007365 | -0.601497 |
| O | 3.110947 | 7.287838 | 0.364430  |
| C | 2.841891 | 3.908419 | -2.679146 |
| C | 3.632967 | 3.776029 | -3.884681 |

|   |          |           |           |
|---|----------|-----------|-----------|
| C | 3.940913 | 2.480577  | -4.346501 |
| O | 3.481198 | 1.356082  | -3.693476 |
| C | 2.483923 | 1.440120  | -2.698393 |
| C | 2.148315 | 2.769598  | -2.227584 |
| C | 4.106476 | 4.868480  | -4.639144 |
| C | 4.886609 | 4.674777  | -5.776898 |
| C | 5.210550 | 3.374096  | -6.192490 |
| C | 4.731650 | 2.273116  | -5.479200 |
| N | 1.963732 | 0.347284  | -2.266229 |
| C | 1.126628 | 2.878737  | -1.257036 |
| N | 0.260083 | 2.993033  | -0.476411 |
| H | 2.365695 | -0.451765 | -2.771454 |
| H | 2.478652 | 4.898377  | -2.401532 |
| H | 5.983839 | 5.095170  | -2.392185 |
| H | 5.826177 | 3.215772  | -7.080136 |
| H | 4.950199 | 1.250255  | -5.790541 |
| H | 3.864533 | 5.876541  | -4.296625 |
| H | 5.143913 | 7.585315  | -1.666197 |
| H | 5.353754 | 2.961248  | 0.347852  |
| H | 5.411859 | 2.558351  | -1.392101 |
| H | 3.883610 | 2.395519  | -0.483086 |
| H | 5.245258 | 5.535964  | -6.343972 |

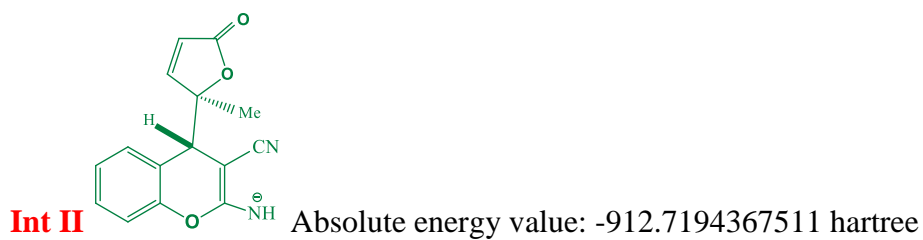

Number of Imaginary Frequency: 0

|   |           |           |           |
|---|-----------|-----------|-----------|
| C | 0.732958  | 1.777922  | 1.439184  |
| C | 0.704616  | 0.309584  | 1.165838  |
| O | 0.372527  | -0.274401 | 2.463101  |
| C | 0.152021  | 0.727080  | 3.386133  |
| C | 0.381928  | 2.018282  | 2.715700  |
| C | 2.050707  | -0.240435 | 0.716607  |
| O | -0.162808 | 0.487894  | 4.540508  |
| C | -0.486397 | -0.100008 | 0.160523  |
| C | -0.439560 | 0.726687  | -1.098832 |
| C | 0.203157  | 0.194874  | -2.229110 |
| O | 0.745385  | -1.062008 | -2.224228 |
| C | 0.234380  | -2.056840 | -1.307162 |
| C | -0.504798 | -1.557859 | -0.200493 |
| C | -1.010541 | 2.002779  | -1.200017 |
| C | -0.910940 | 2.754714  | -2.374465 |
| C | -0.227857 | 2.224051  | -3.476211 |
| C | 0.322194  | 0.943096  | -3.409384 |
| N | 0.512429  | -3.286622 | -1.597153 |

|   |           |           |           |
|---|-----------|-----------|-----------|
| C | -1.203630 | -2.453299 | 0.614909  |
| N | -1.830766 | -3.171115 | 1.307565  |
| H | 0.964637  | -3.324571 | -2.517831 |
| H | -1.397018 | 0.158049  | 0.723834  |
| H | 0.993388  | 2.504444  | 0.671496  |
| H | -0.138088 | 2.802161  | -4.398584 |
| H | 0.833147  | 0.496353  | -4.264226 |
| H | -1.536088 | 2.410725  | -0.332415 |
| H | 0.282403  | 2.971217  | 3.230084  |
| H | 2.827241  | -0.001541 | 1.456429  |
| H | 2.332702  | 0.198275  | -0.250910 |
| H | 1.976033  | -1.329981 | 0.601034  |
| H | -1.363522 | 3.746592  | -2.429904 |
